# Supplementary material for: Genotyping-by-sequencing enables linkage mapping in three octoploid cultivated strawberry families
Source: PubMed Central journal article supplement (PMC5581533; doi:10.7717/peerj.3731), 2017-08-30

# Fvb 1

## Holiday\_1

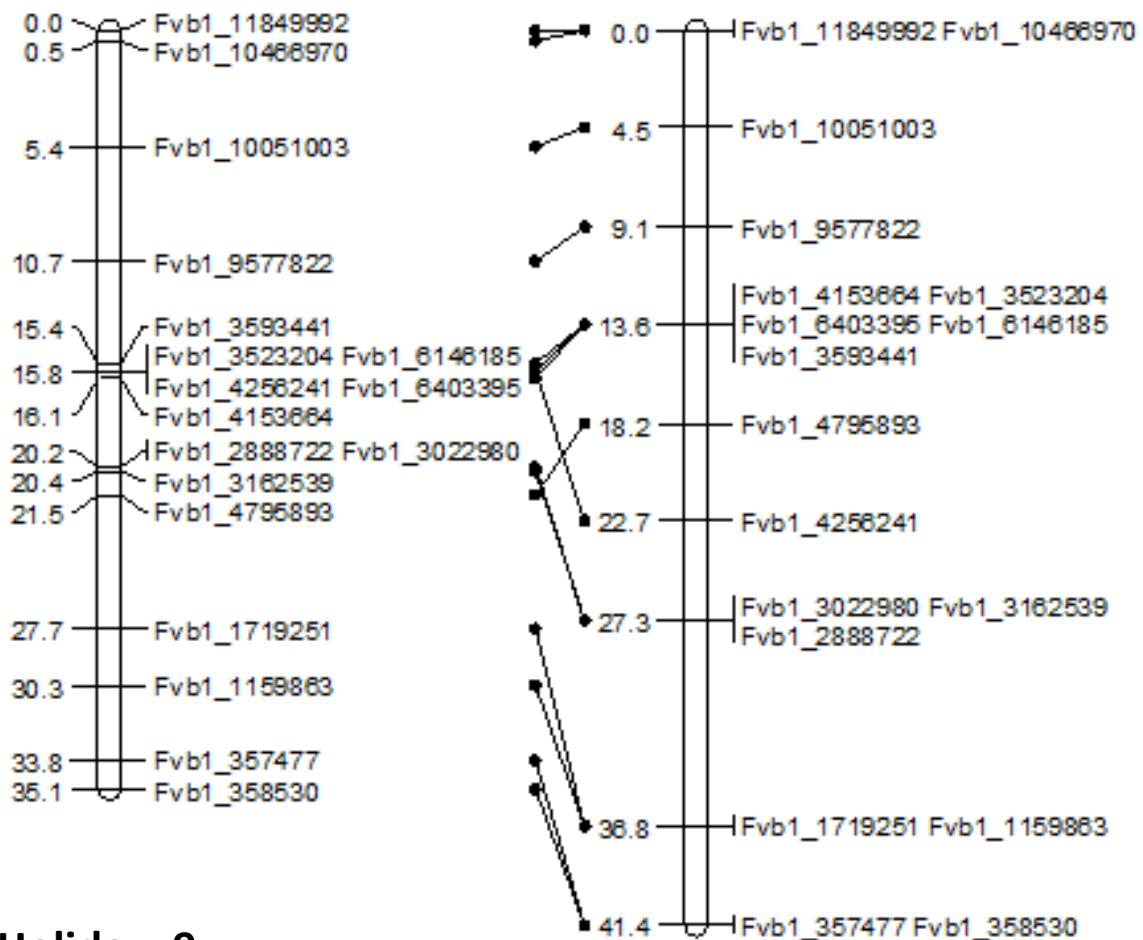

## Holiday\_9

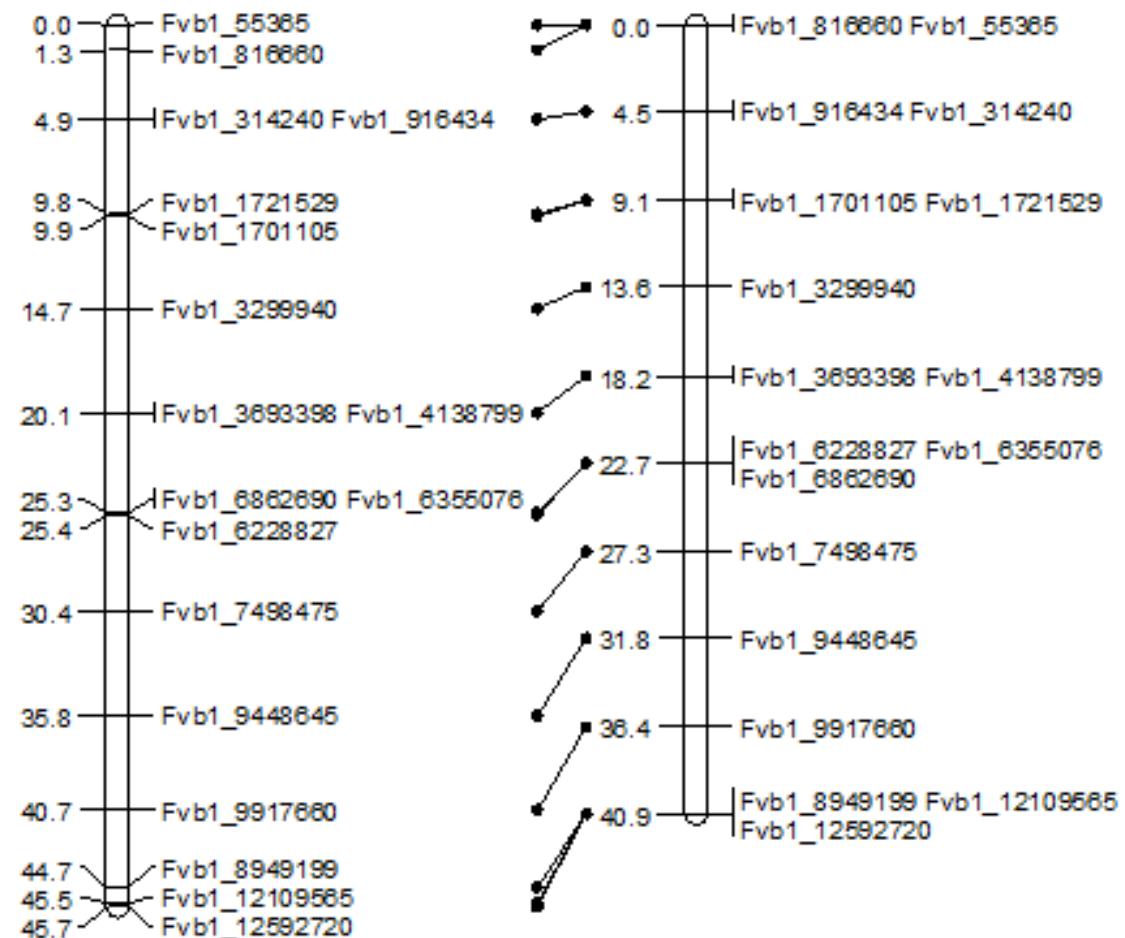

# Fvb 1

## Holiday\_25

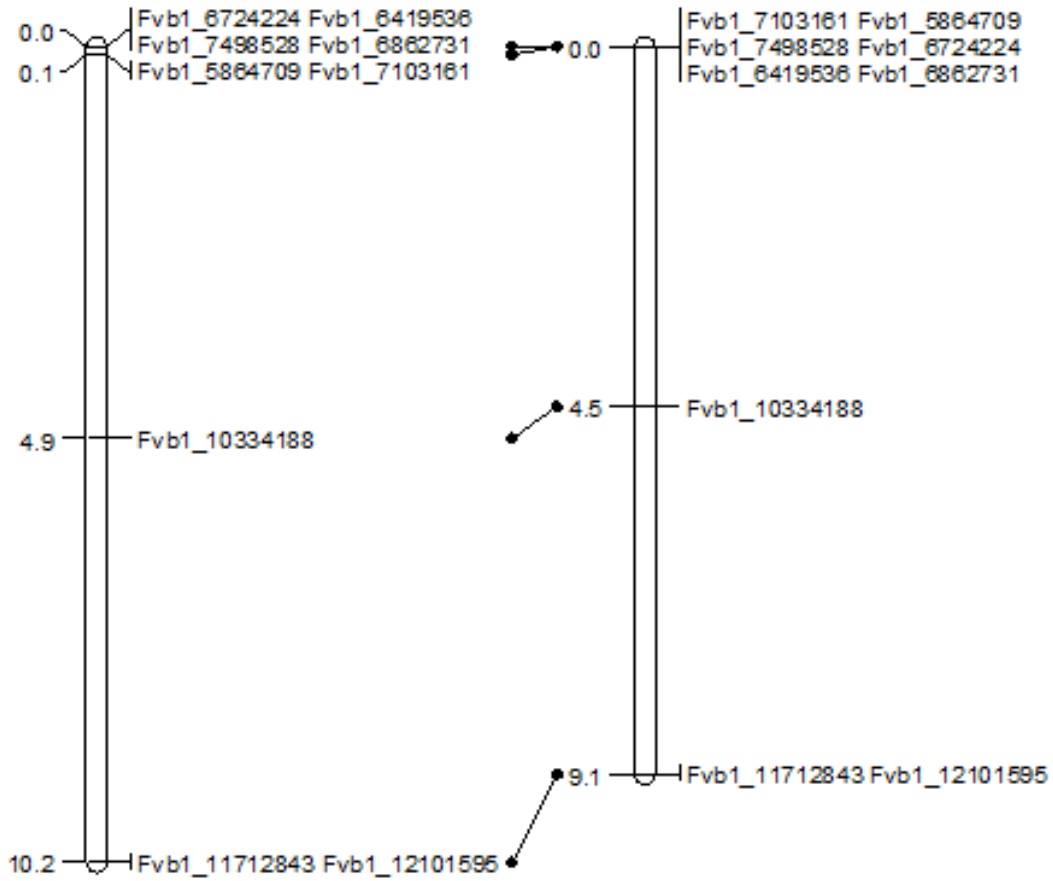

## Holiday\_33

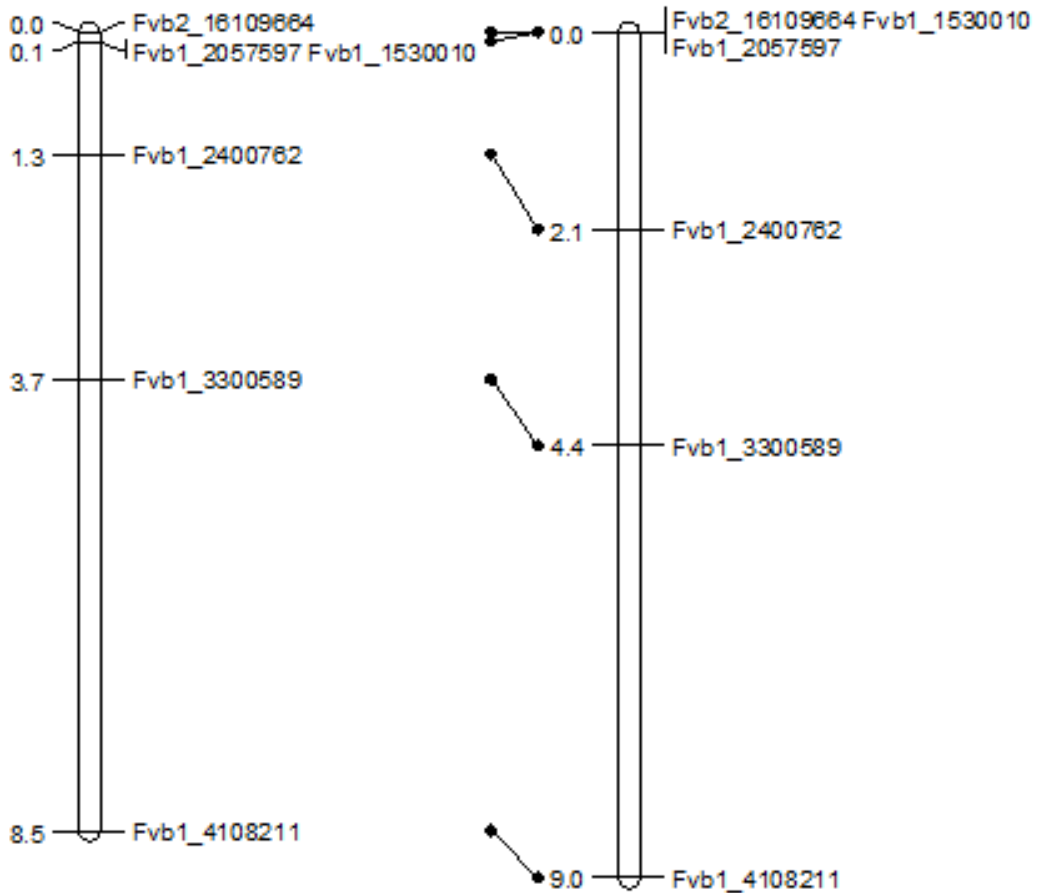

# Fvb 1

## Korona\_13

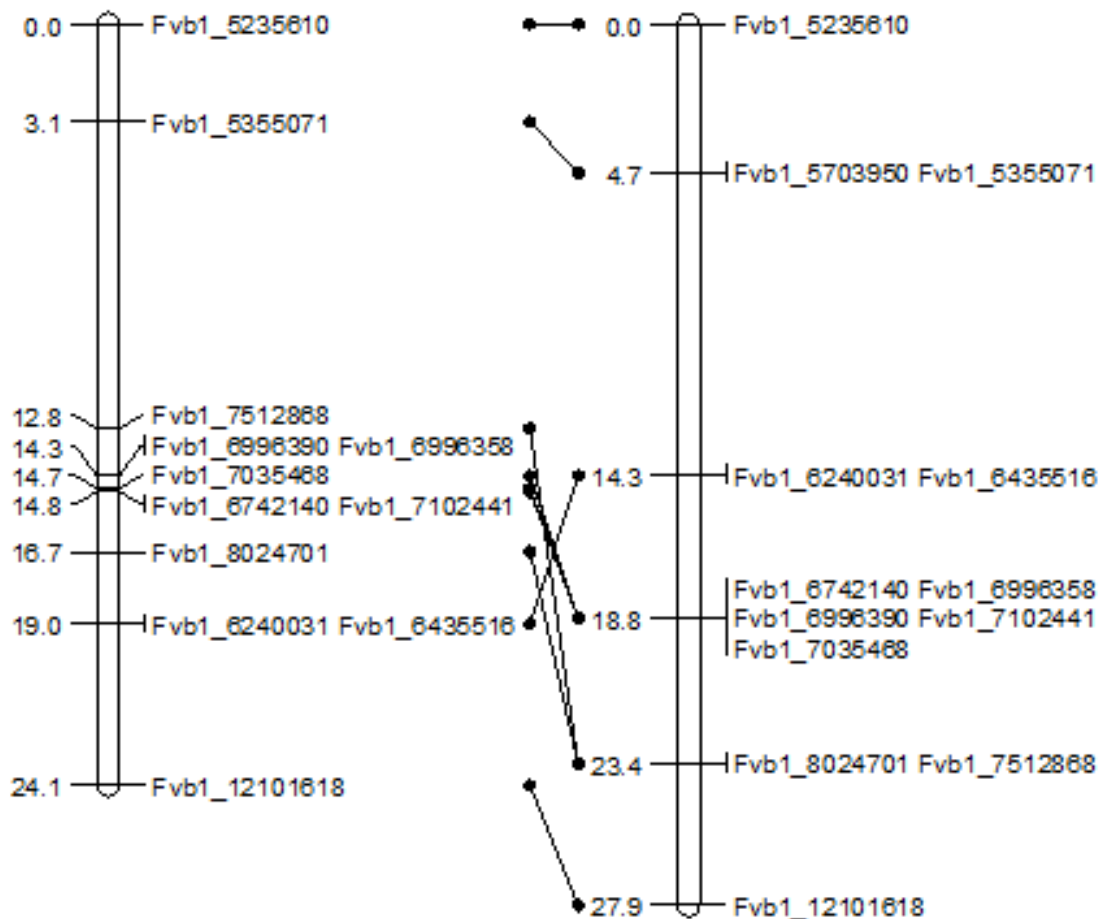

## Korona\_15

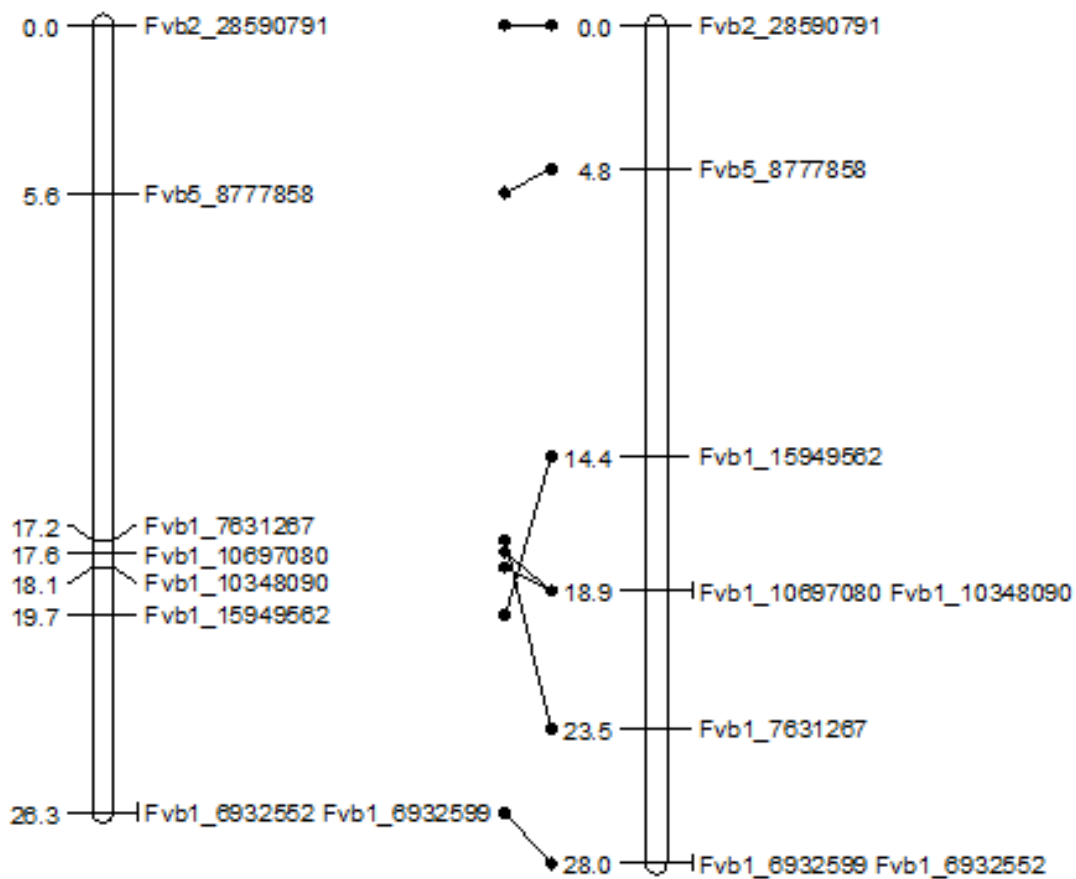

# Fvb 1

## Korona\_16

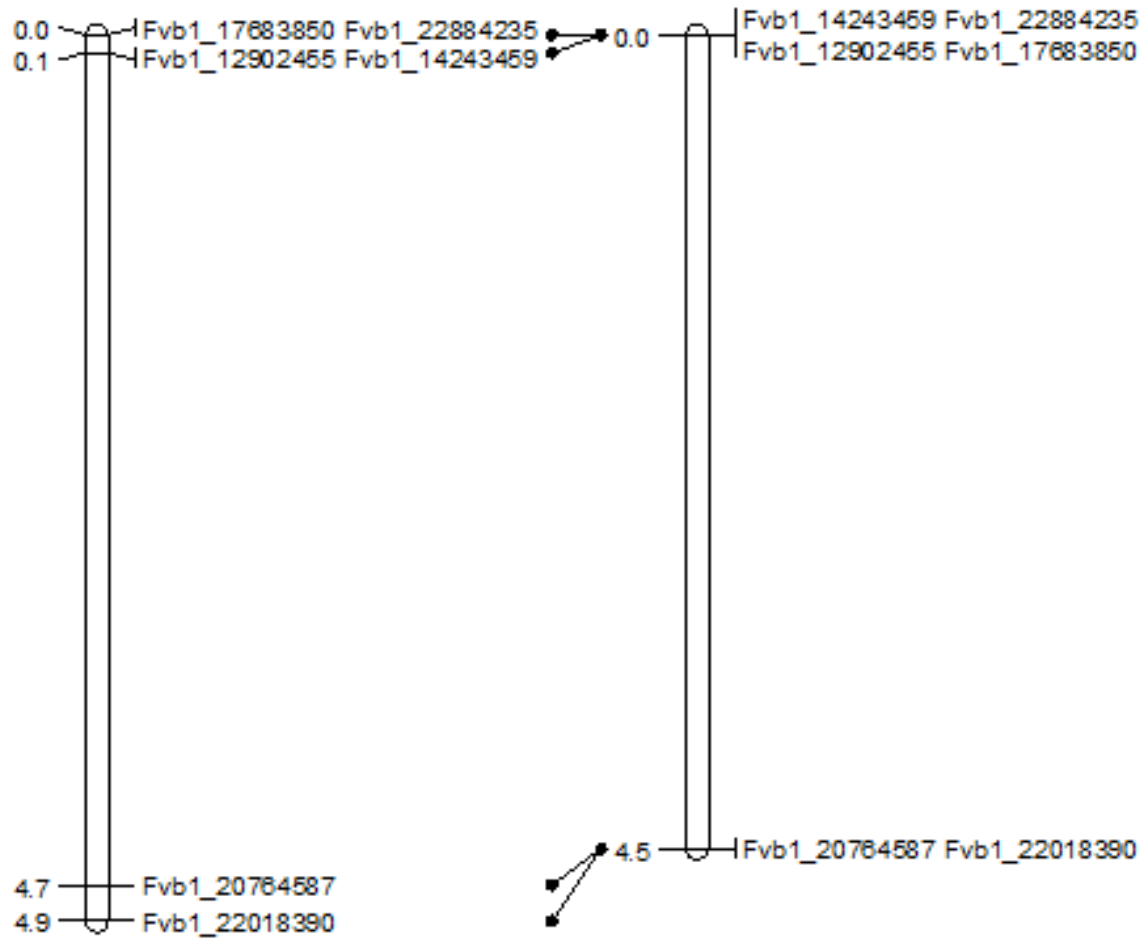

## Korona\_32

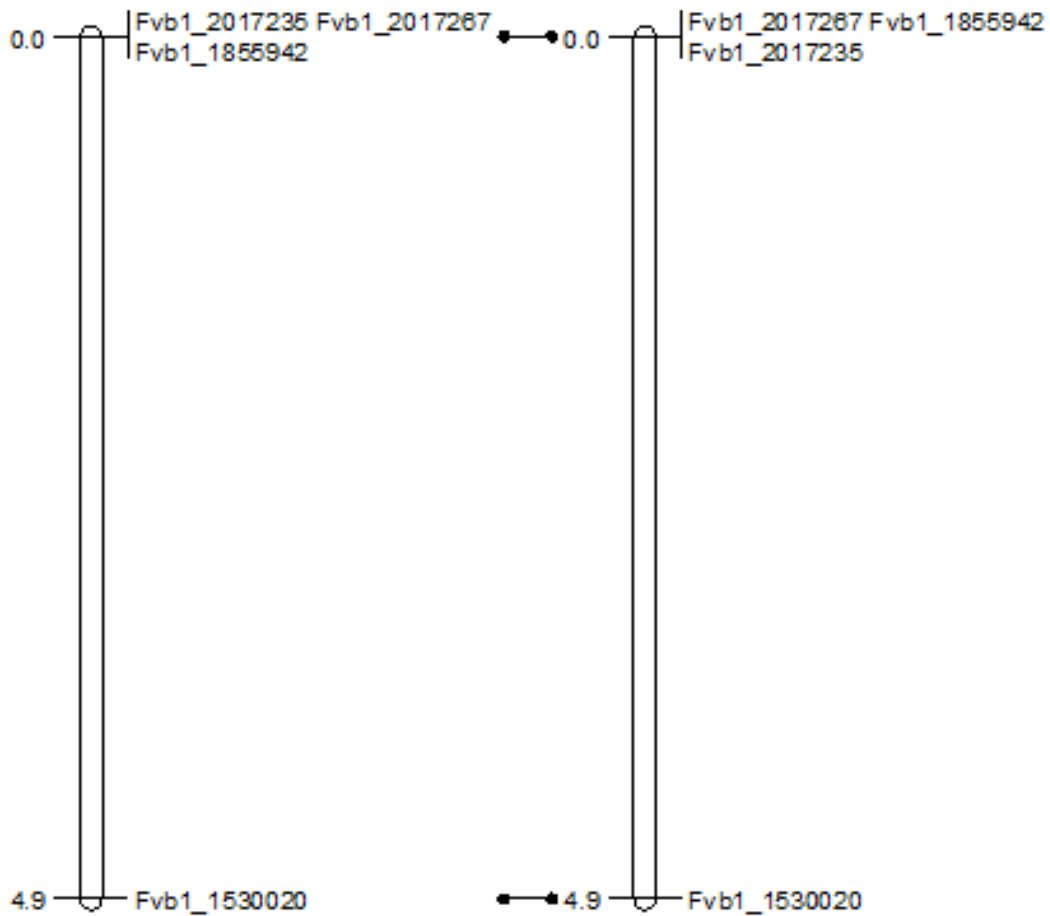

# Fvb 2

## Holiday\_30

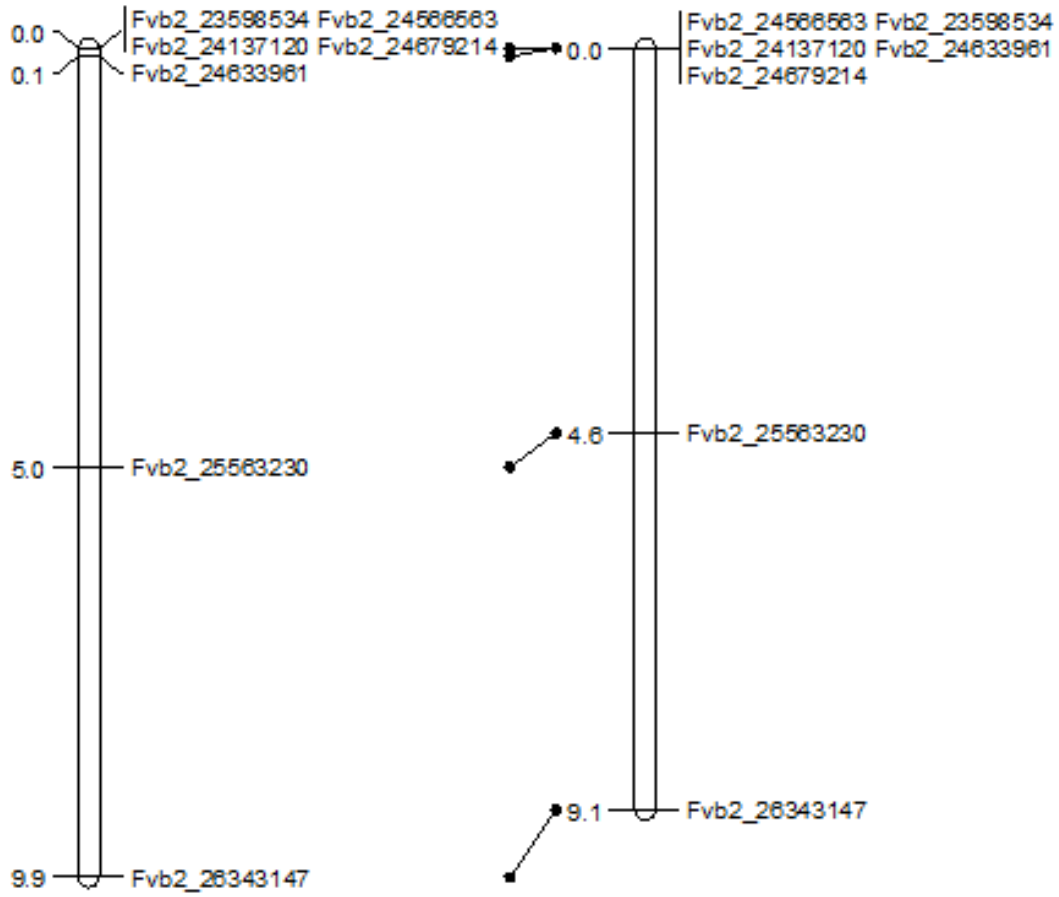

## Holiday\_31

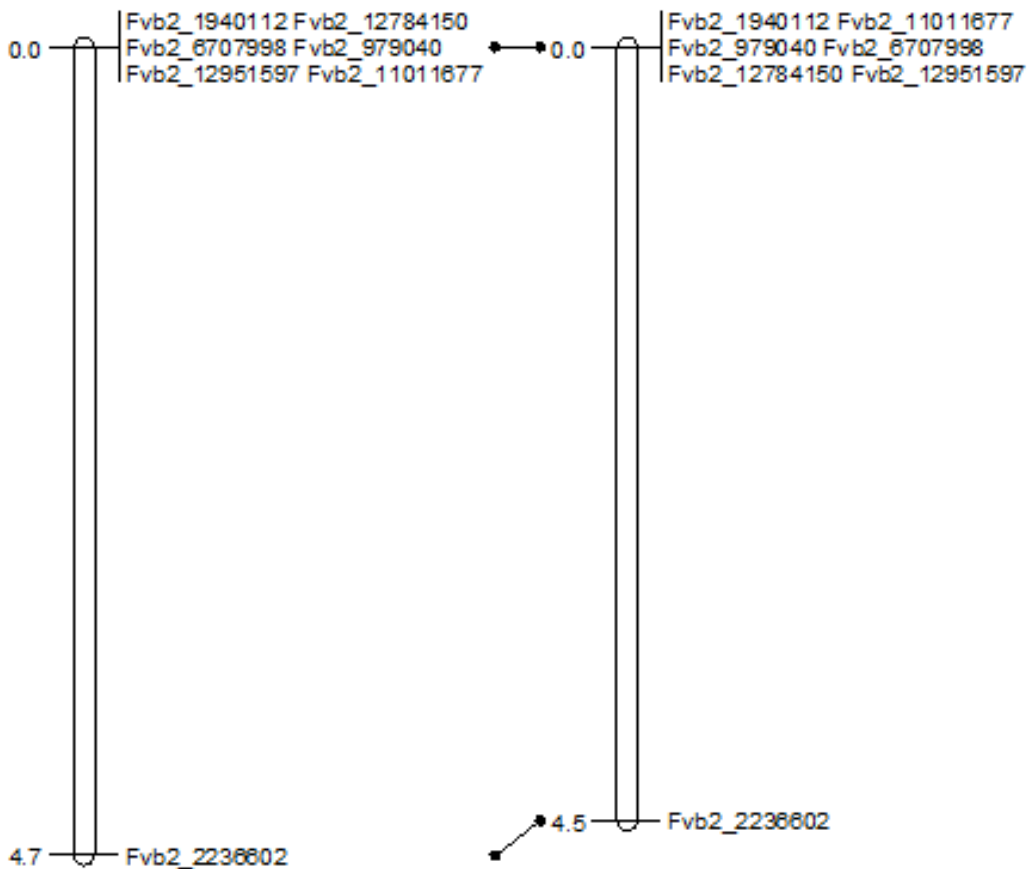

# Fvb 2

## Holiday\_34

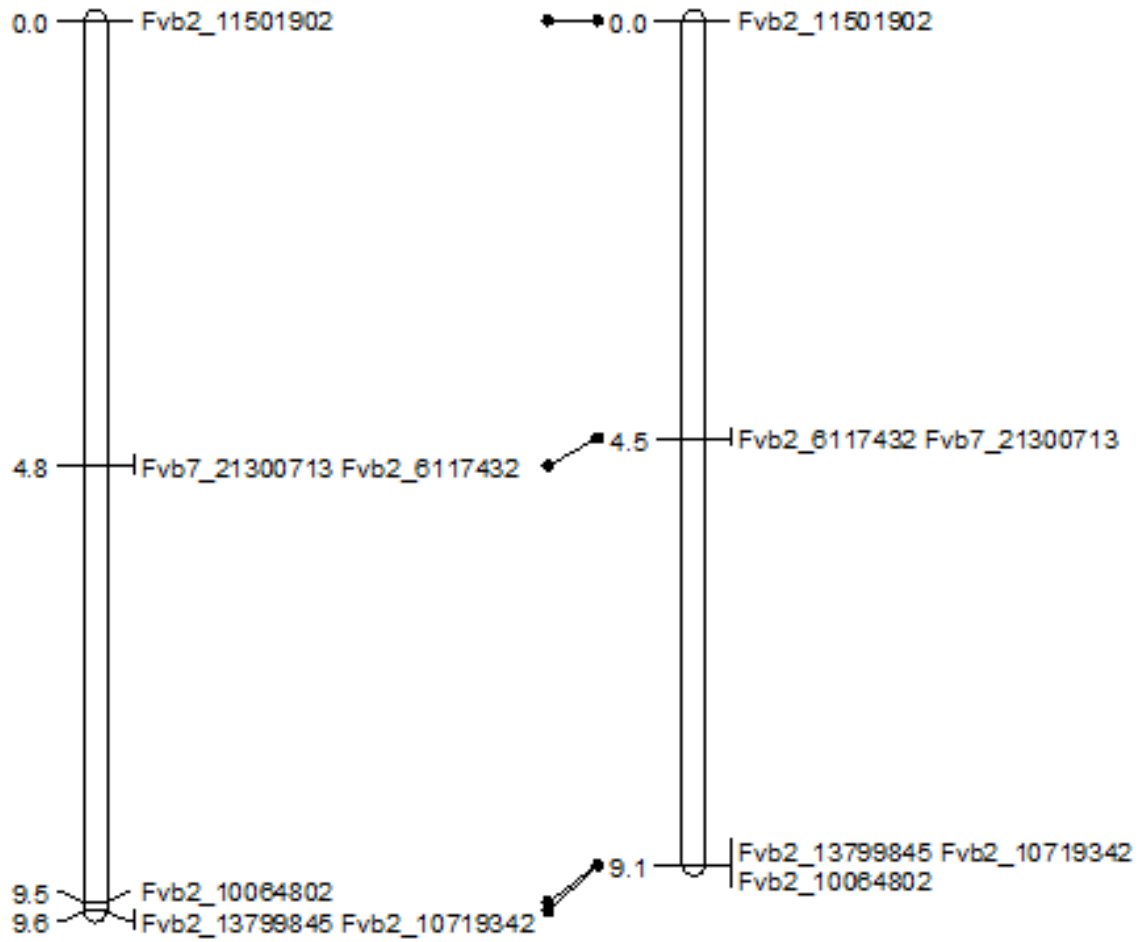

## Holiday\_35

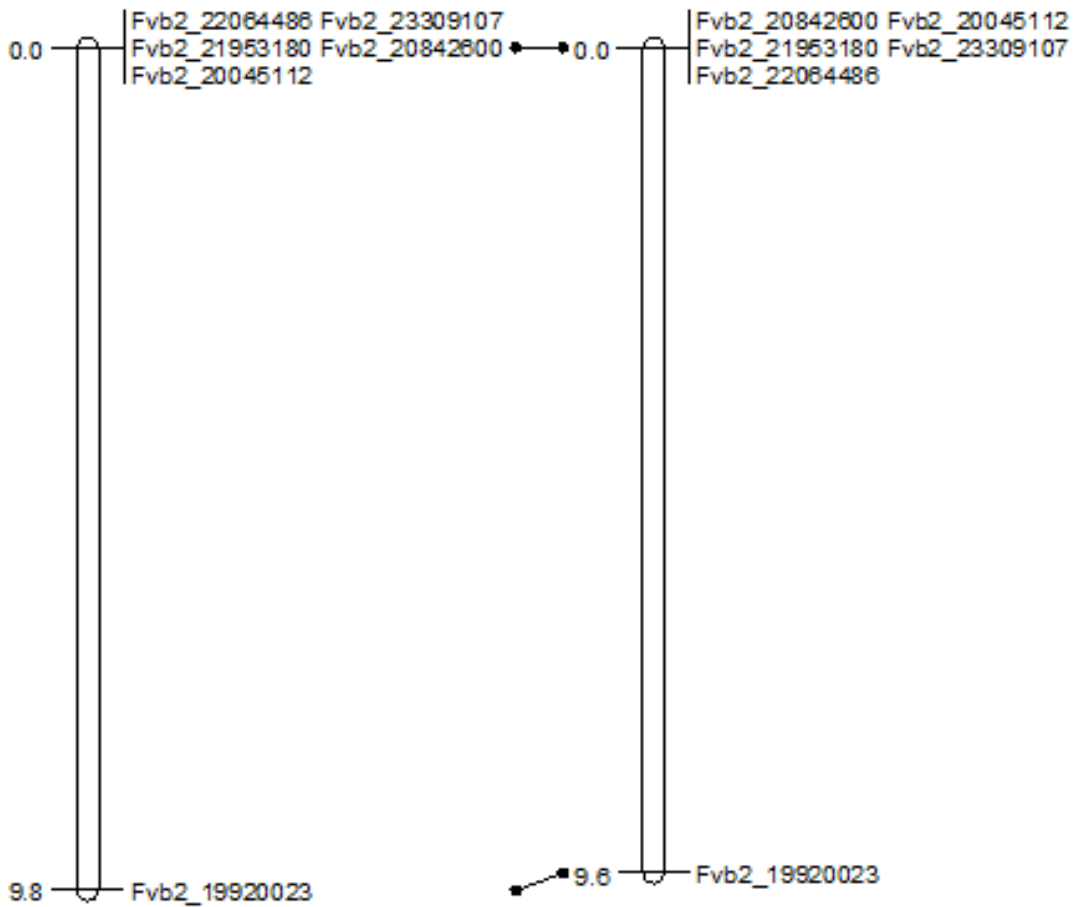

# Fvb 2

## Korona\_2

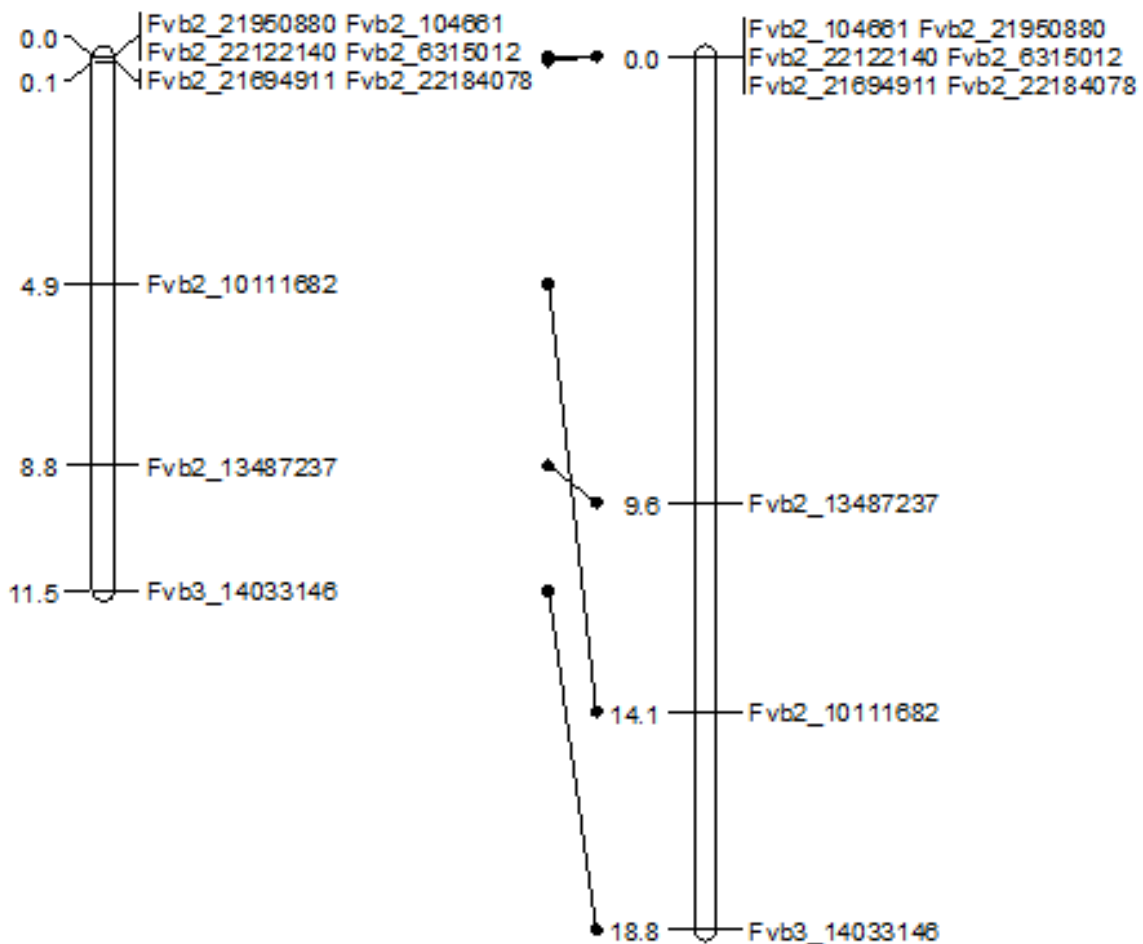

## Korona\_11

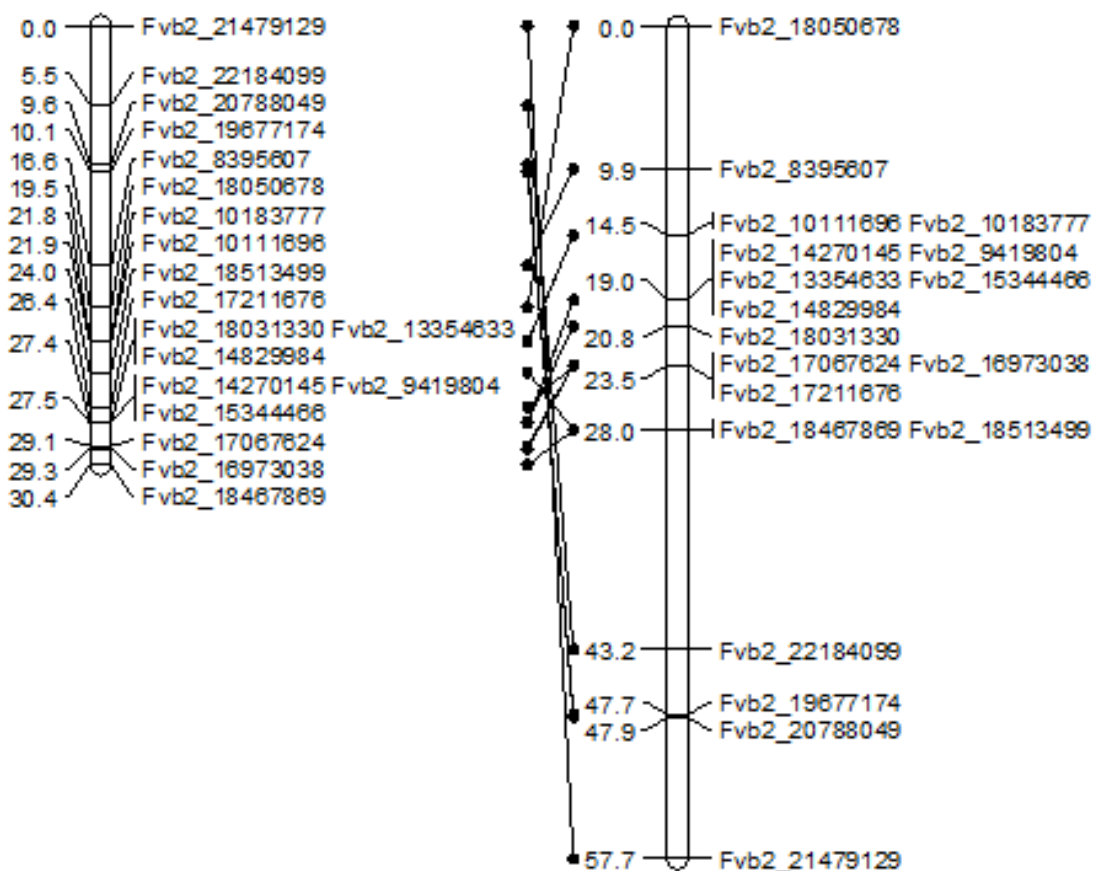

# Fvb 2

## Korona\_26

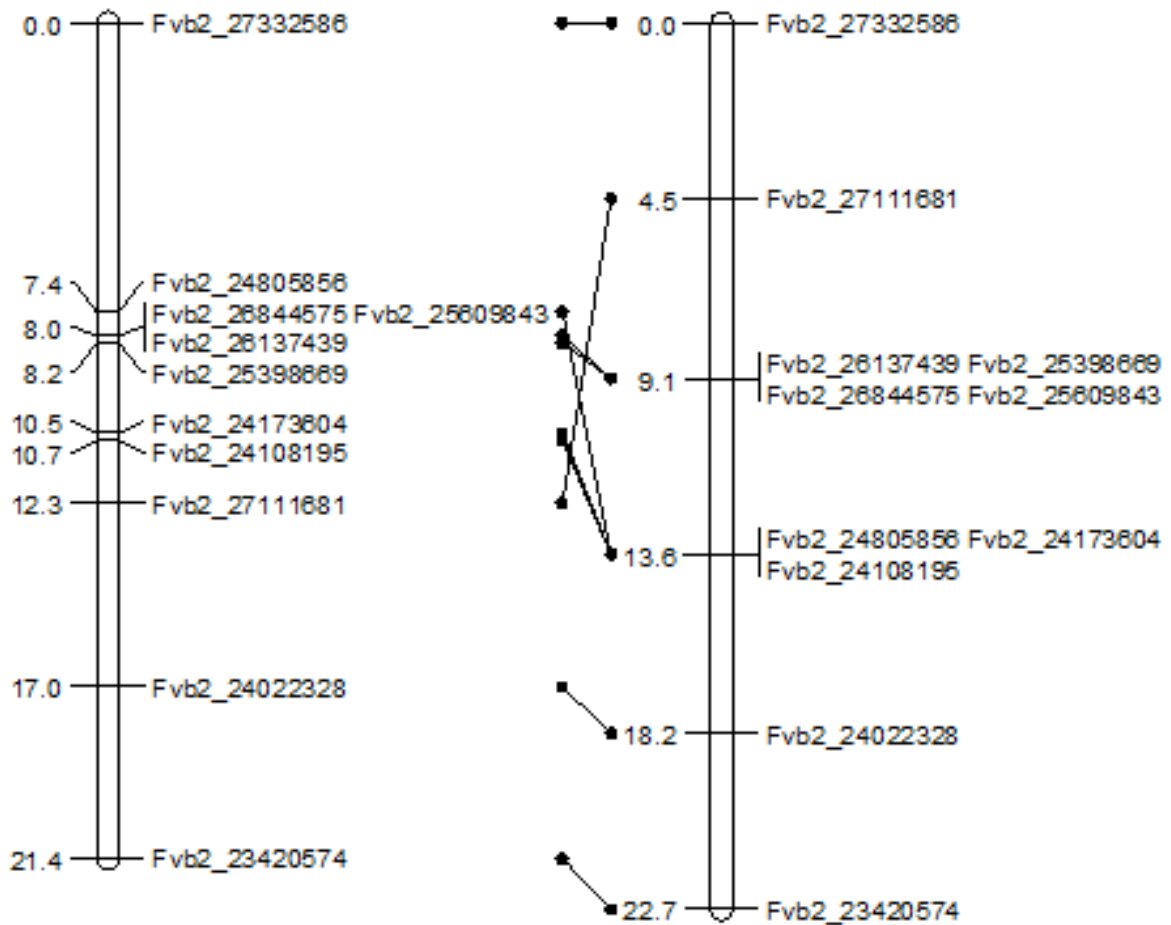

## Korona\_40

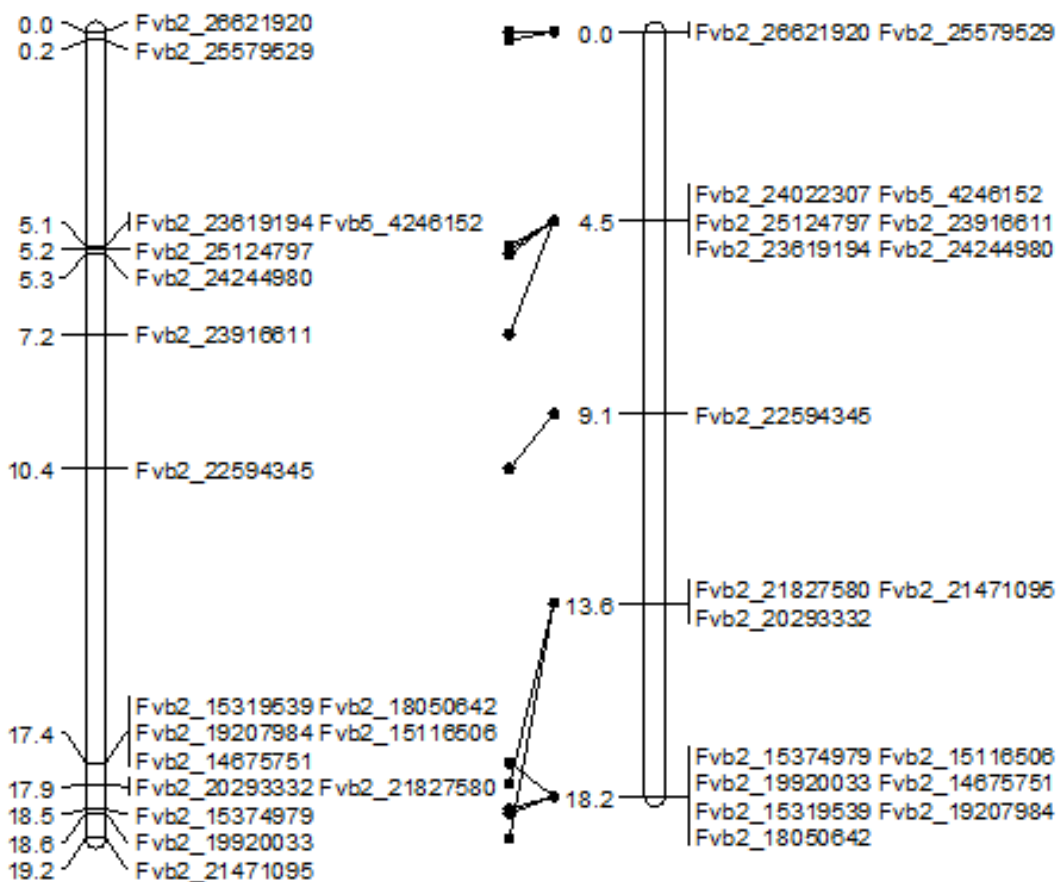



# Fvb 2

## Korona\_49

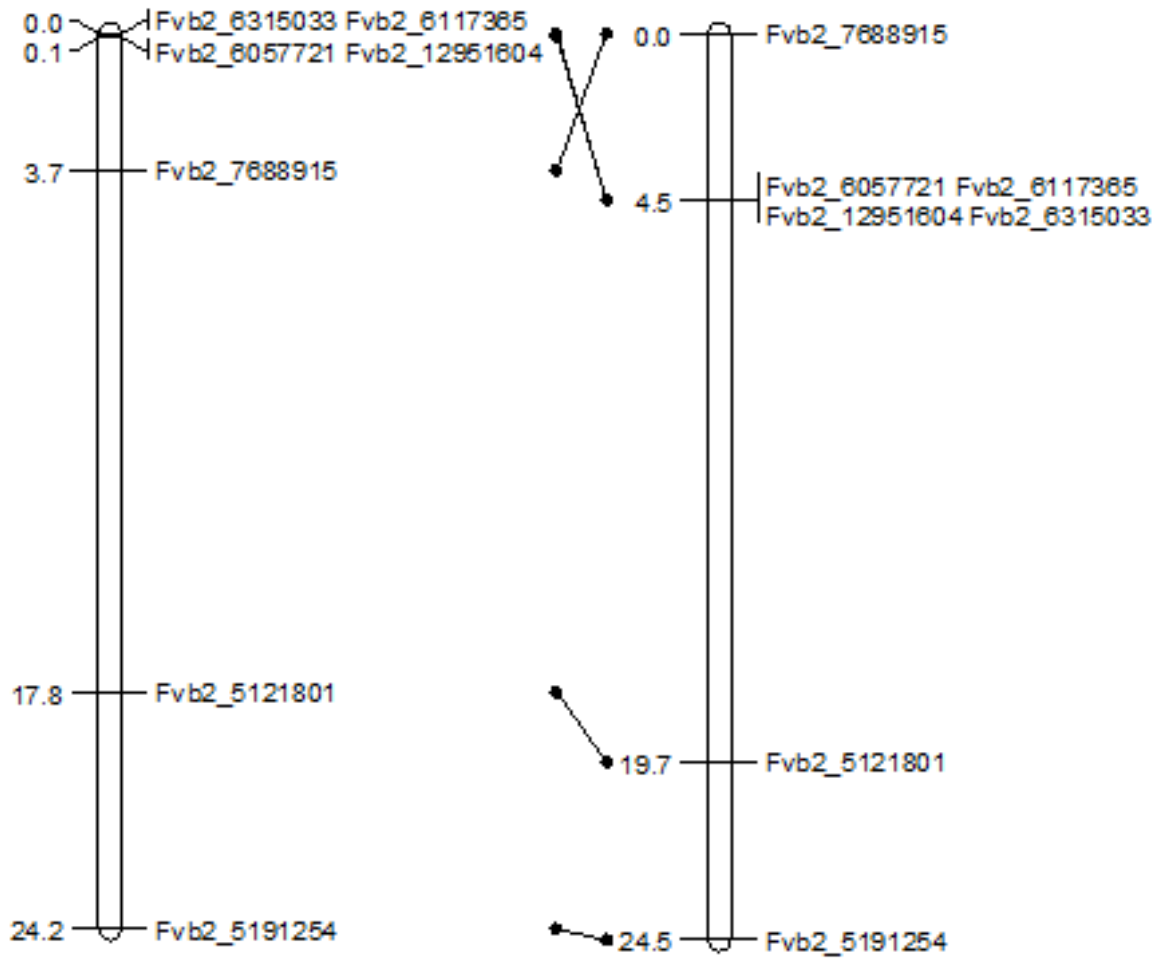

# Fvb 3

## Holiday\_8

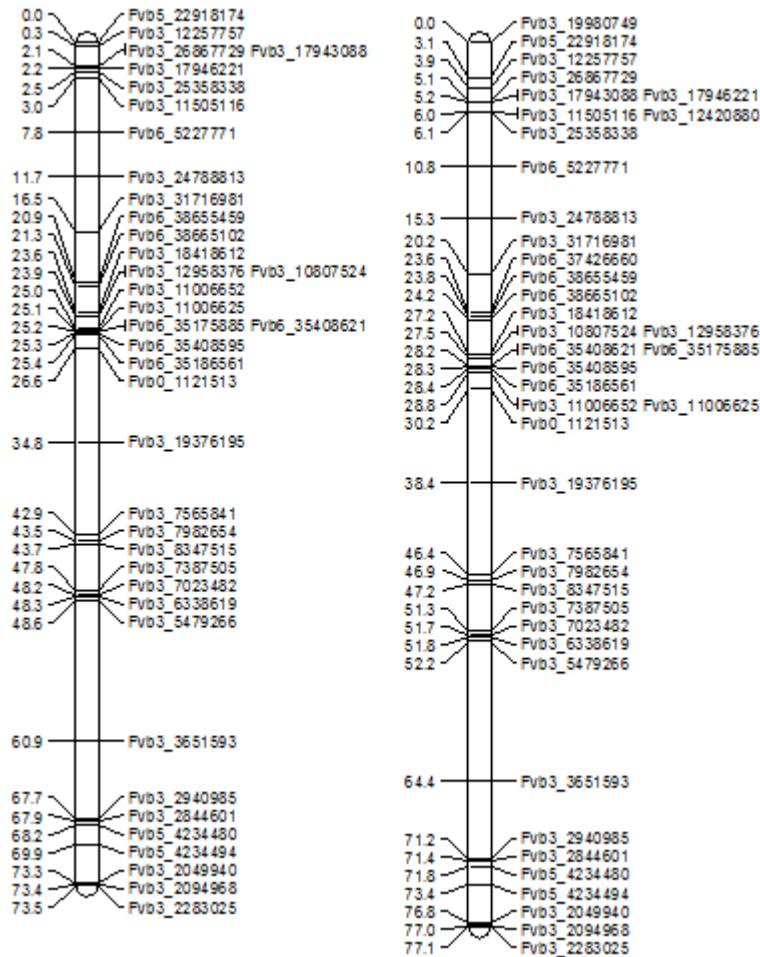

## Holiday\_11

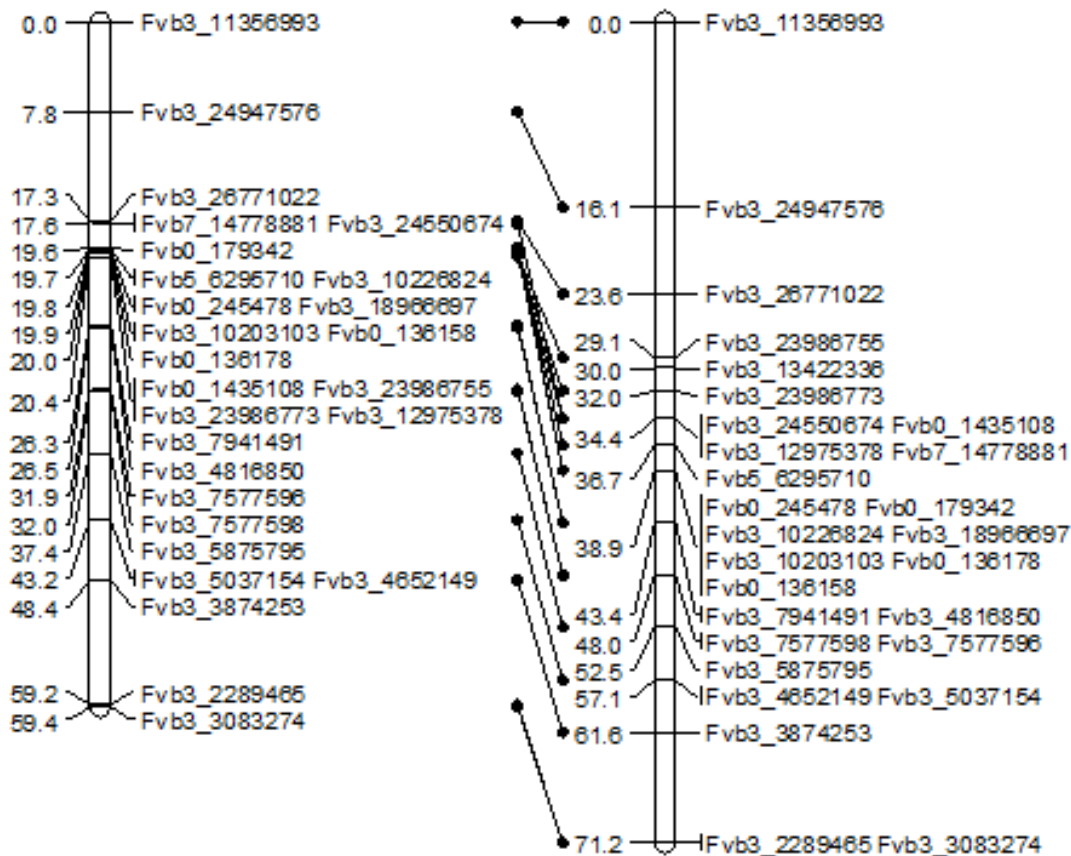

# Fvb 3

## Holiday\_17

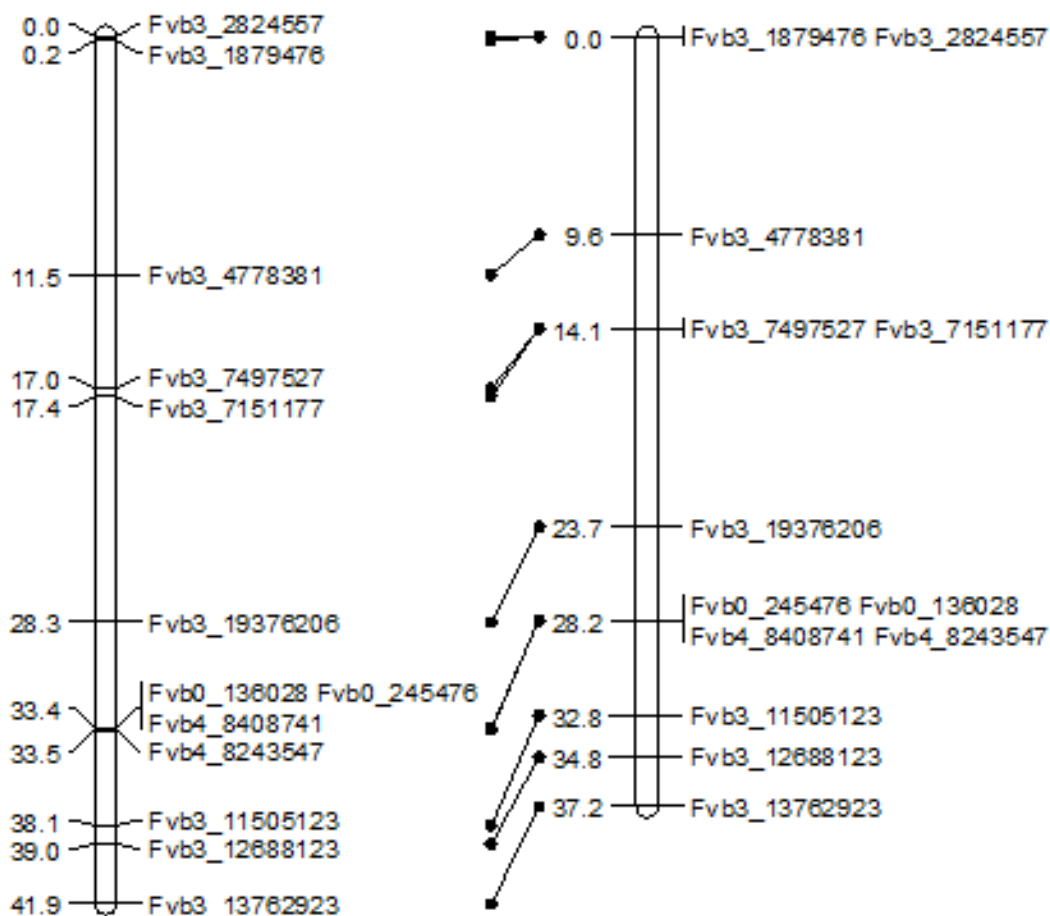

## Holiday\_22

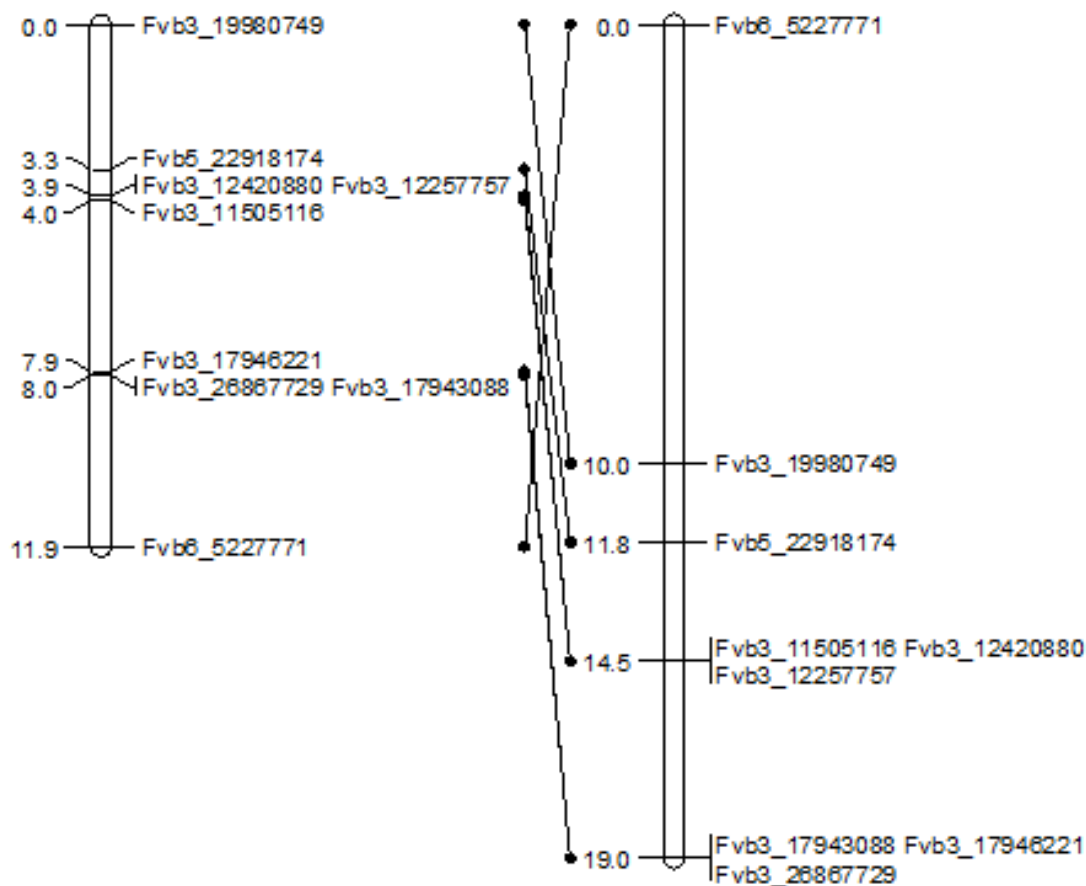

# Fvb 3

## Holiday\_29

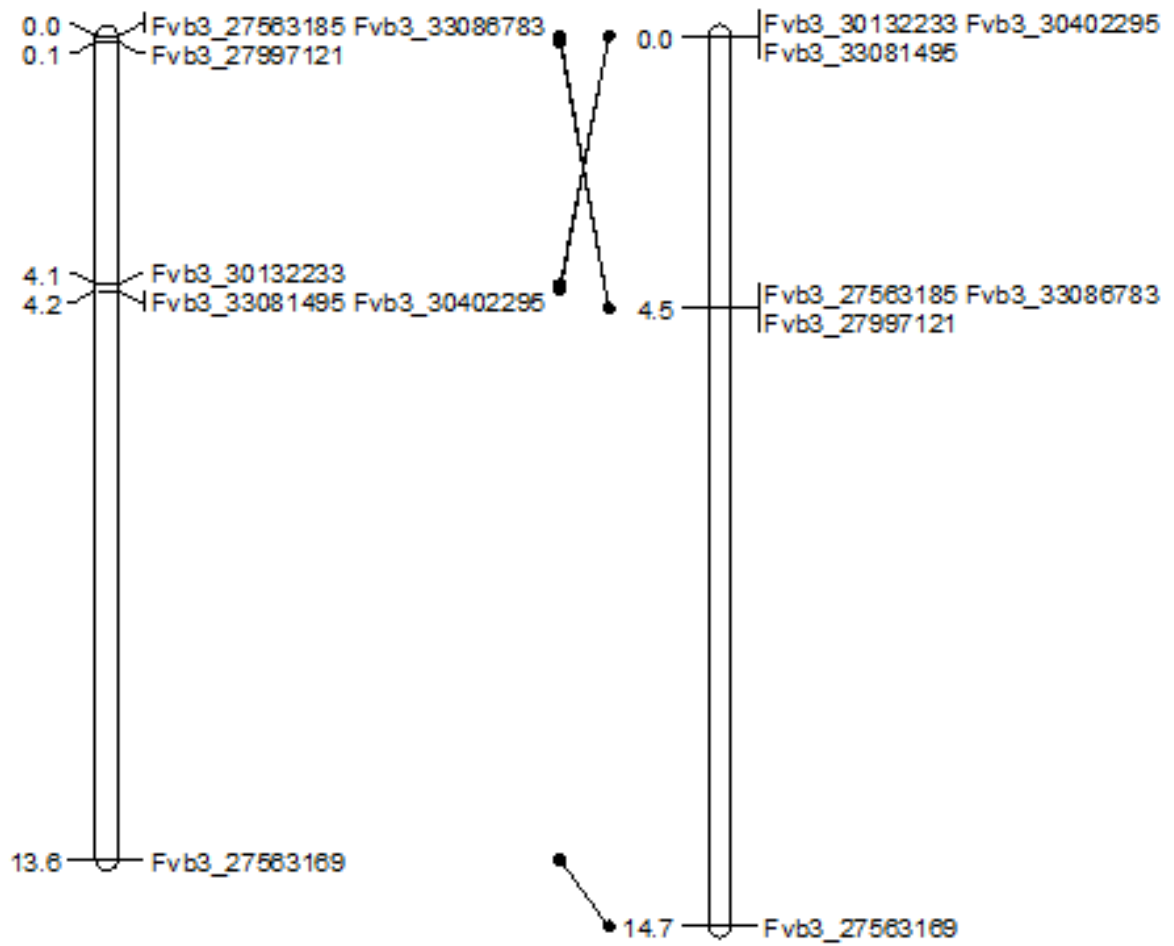

# Fvb 3

## Korona\_4

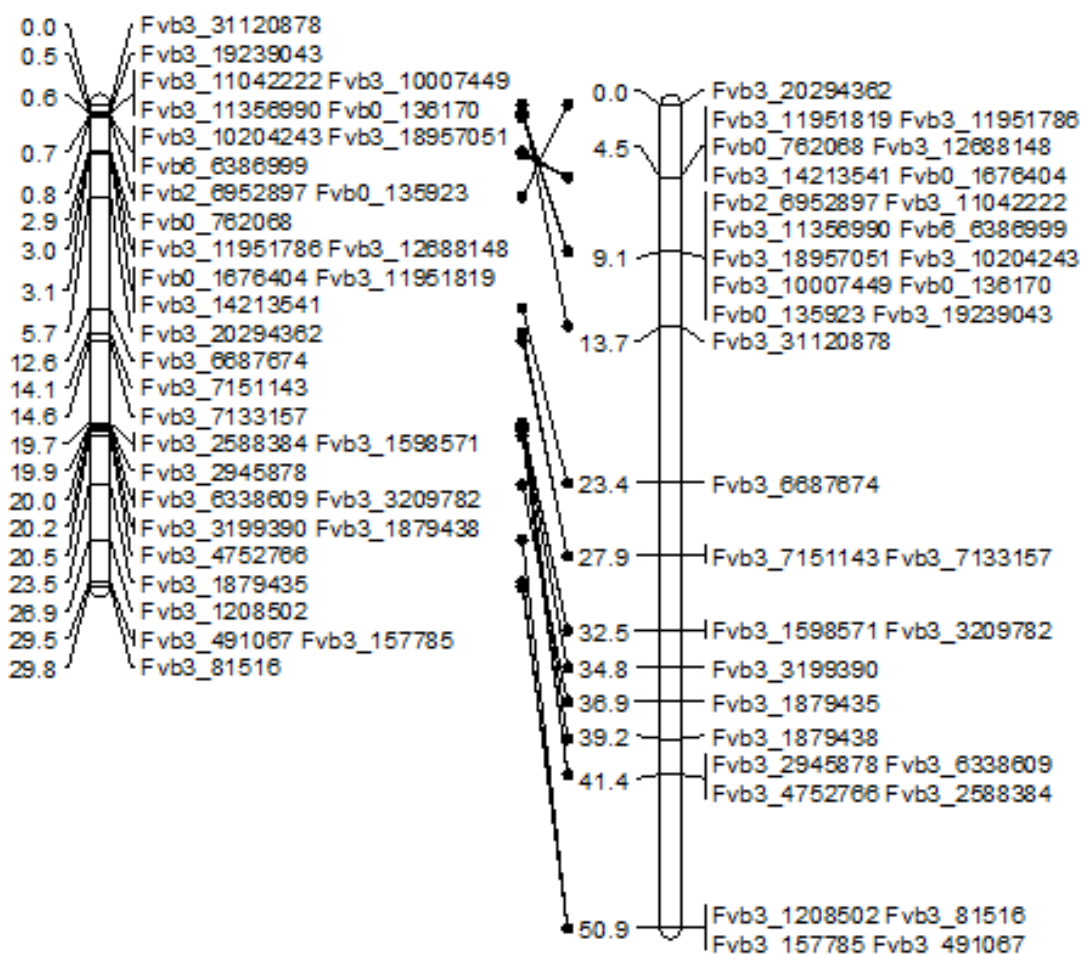

## Korona\_21

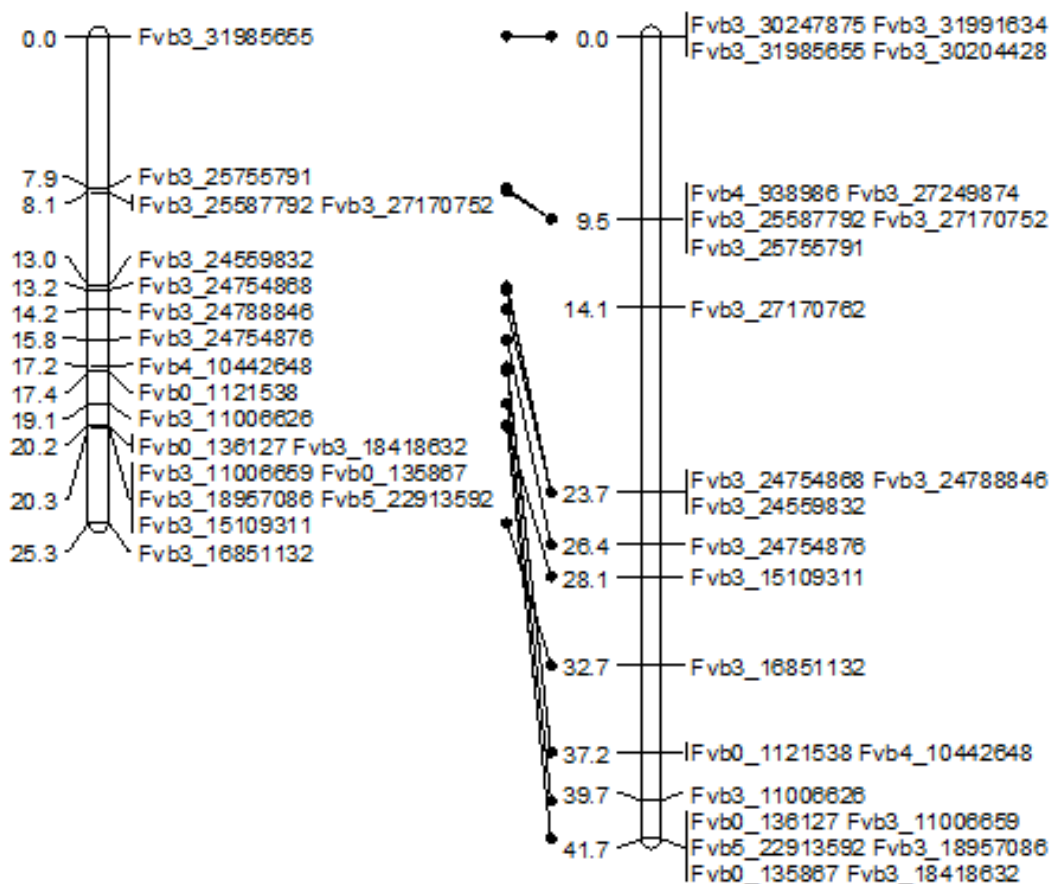

# Fvb 3

## Korona\_22

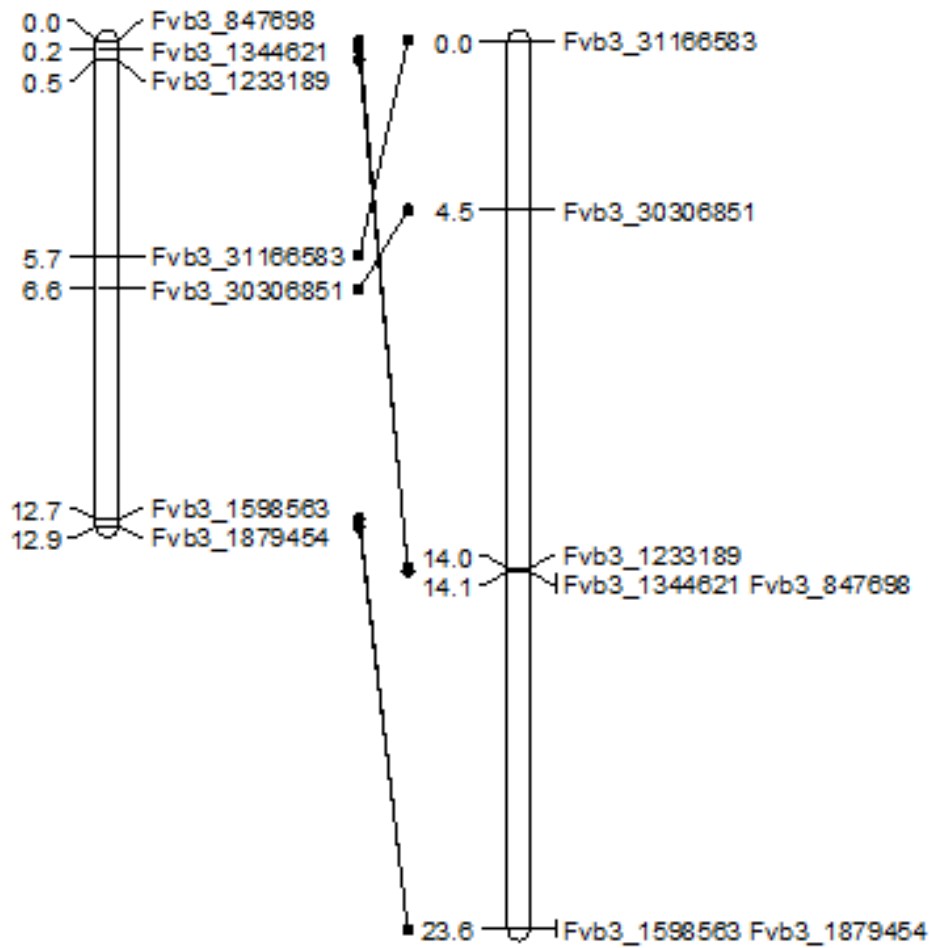

## Korona\_31

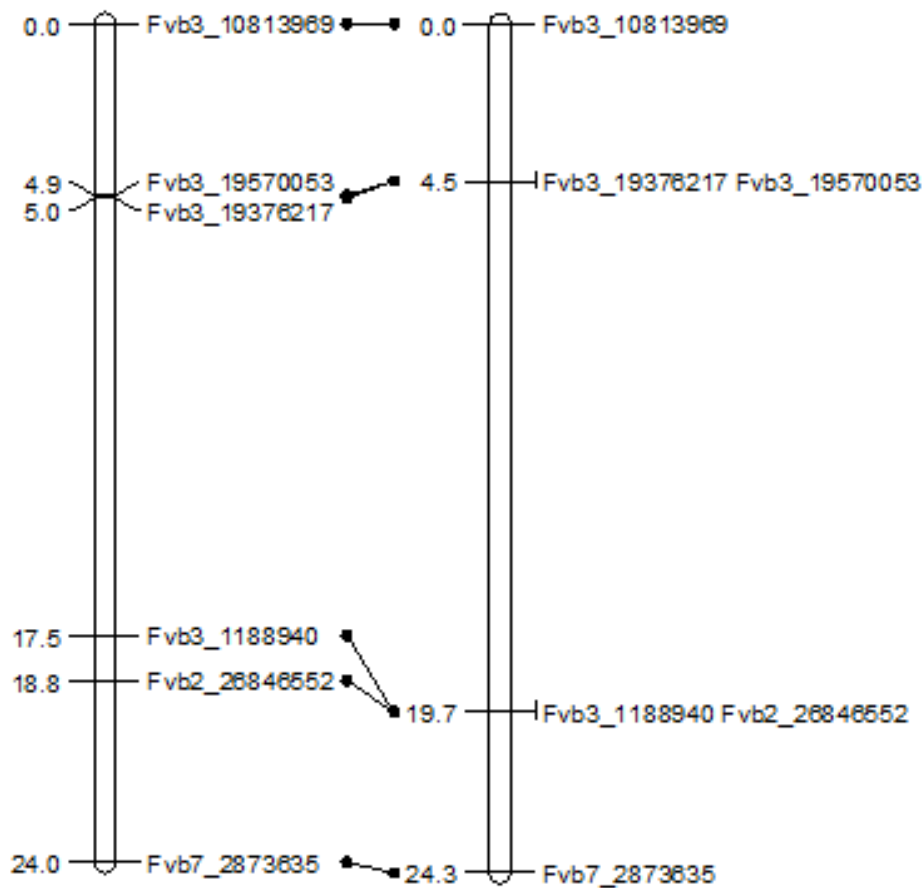

# Fvb 3

## Korona\_34

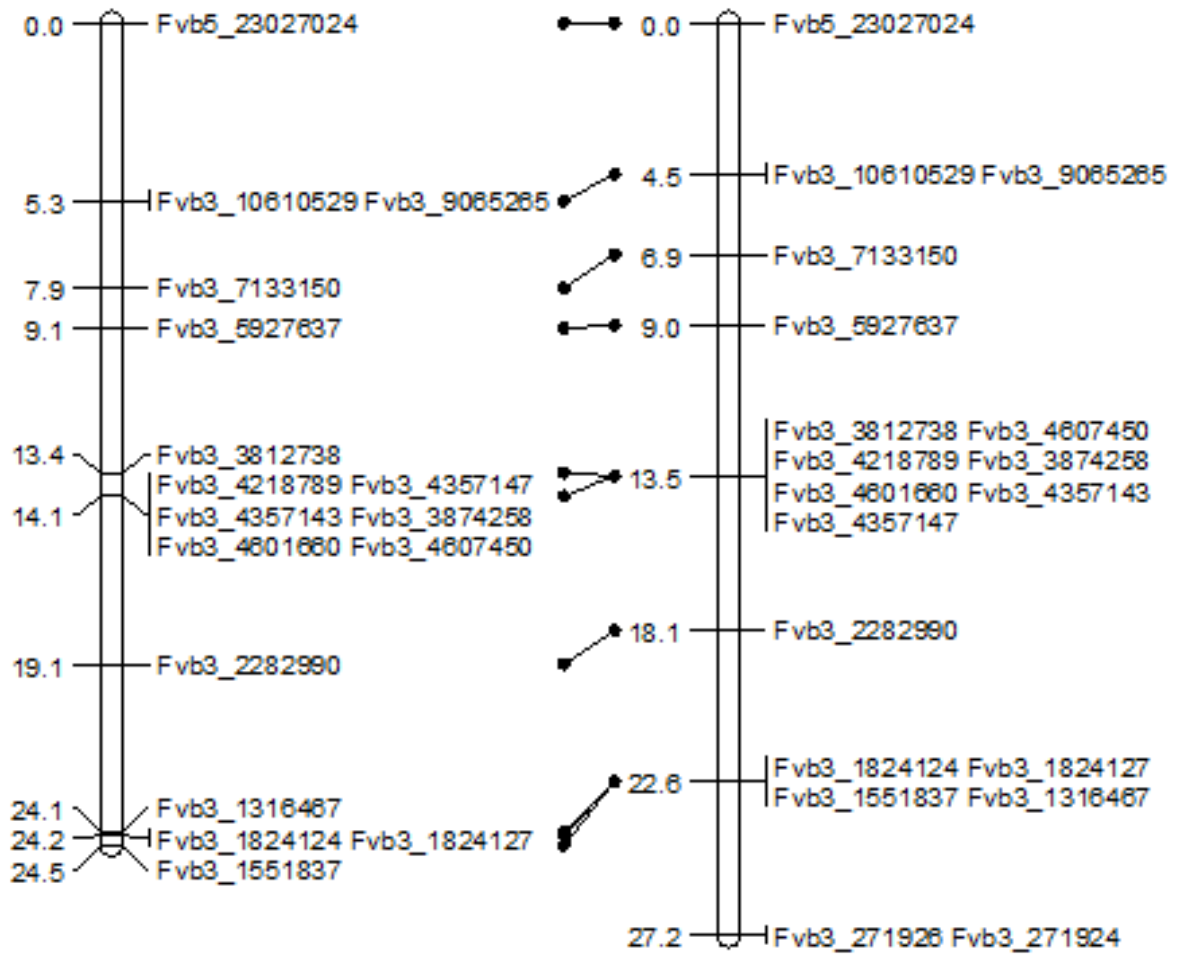

# Fvb 4

## Holiday\_13

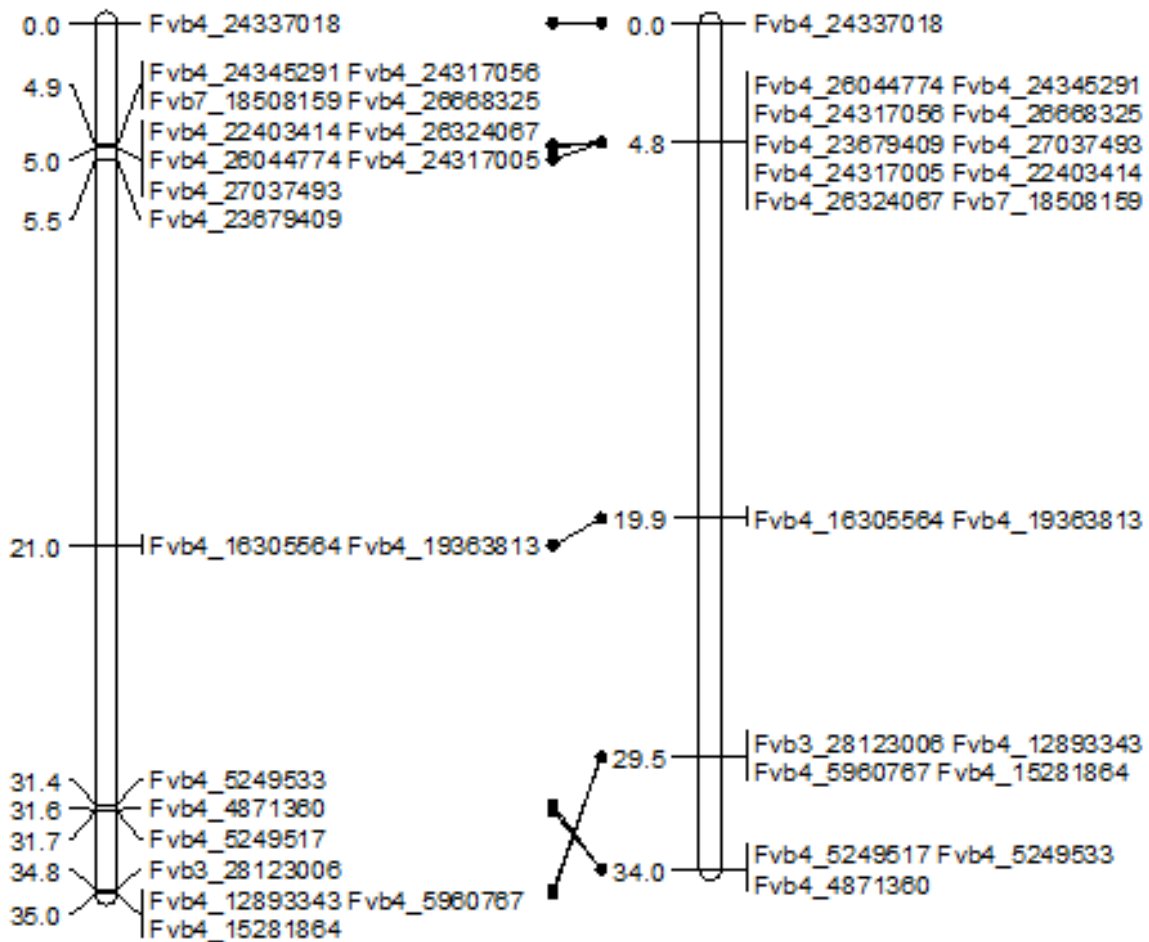

## Holiday\_27

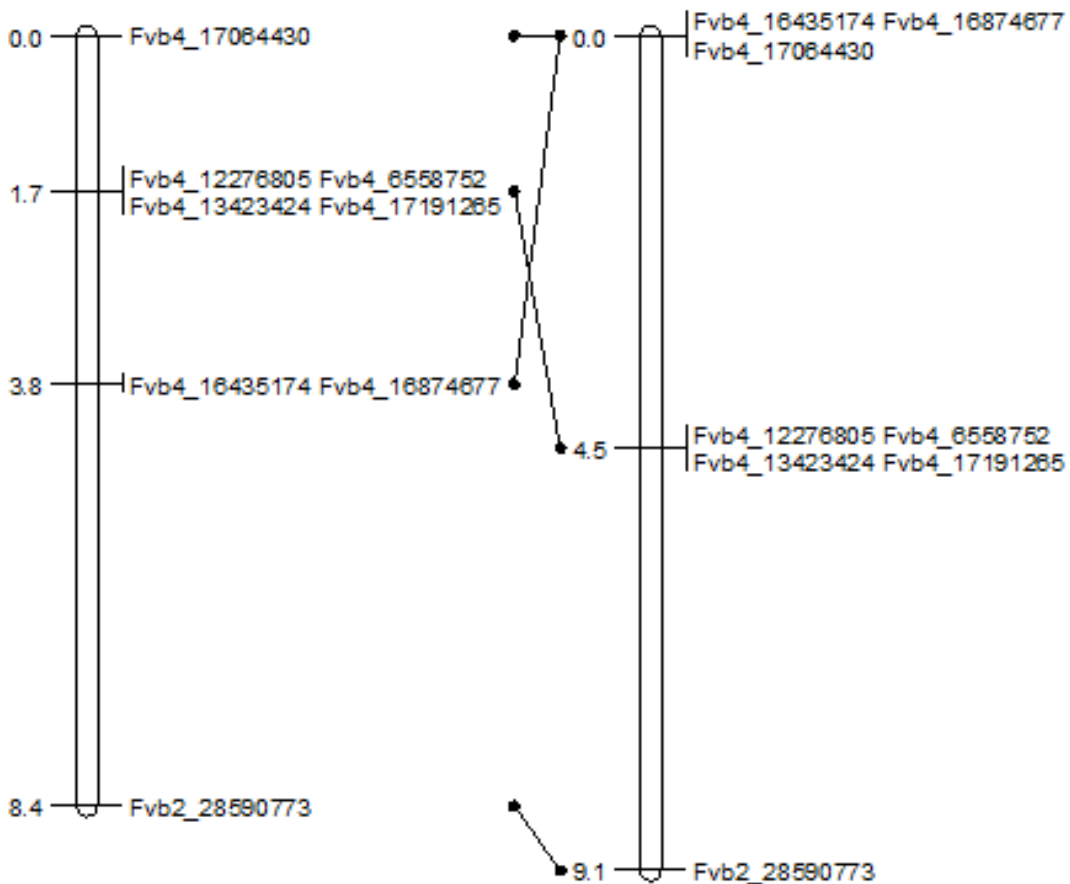



# Fvb 4

## Holiday\_28

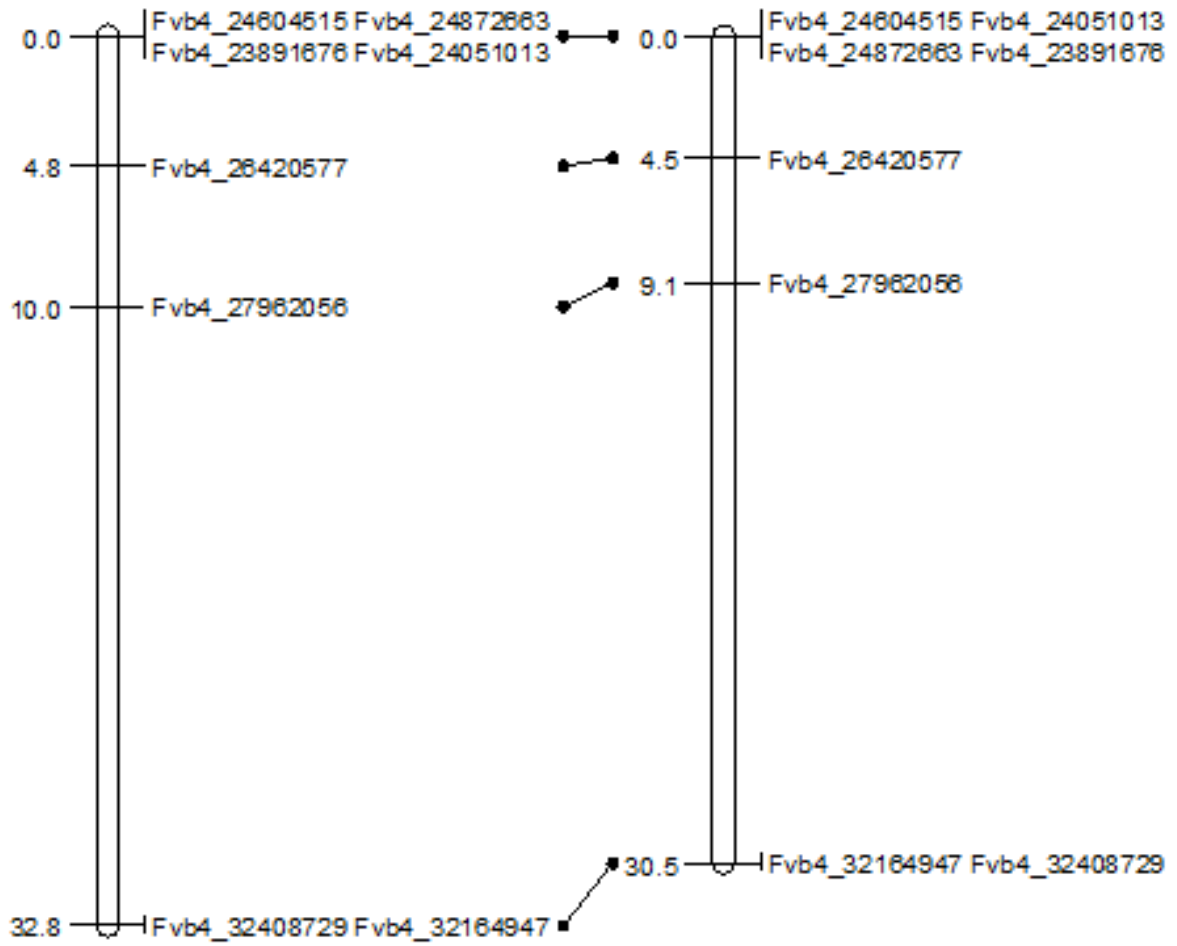

## Holiday\_36

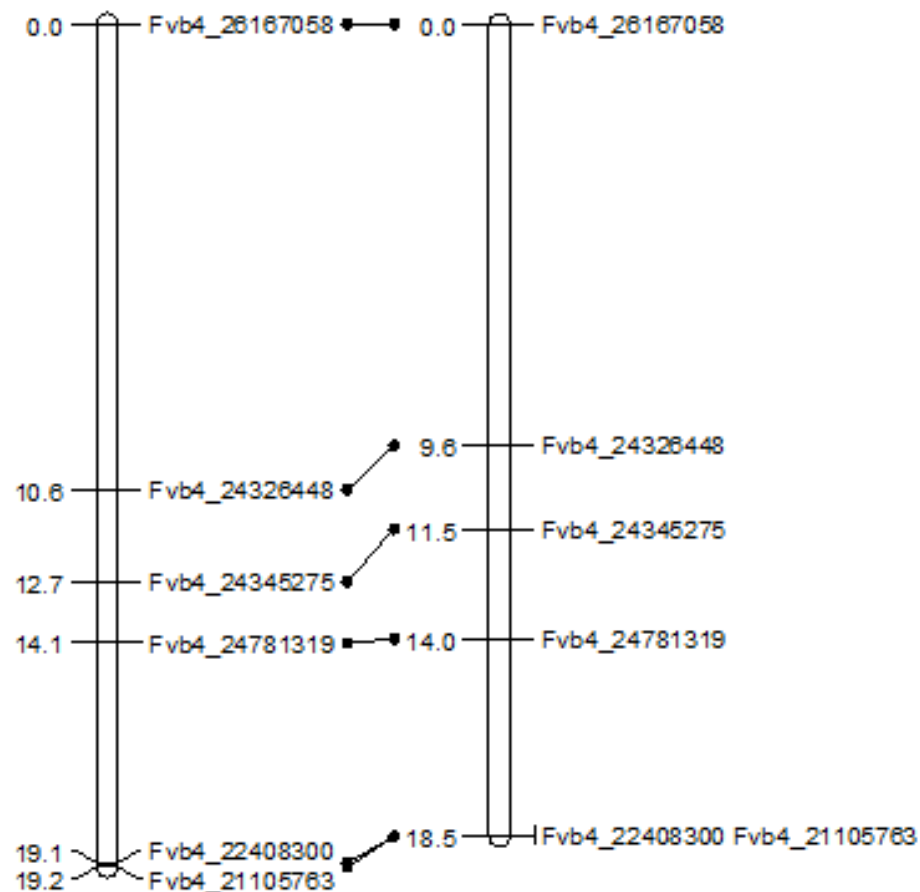

# Fvb 4

## Korona\_12

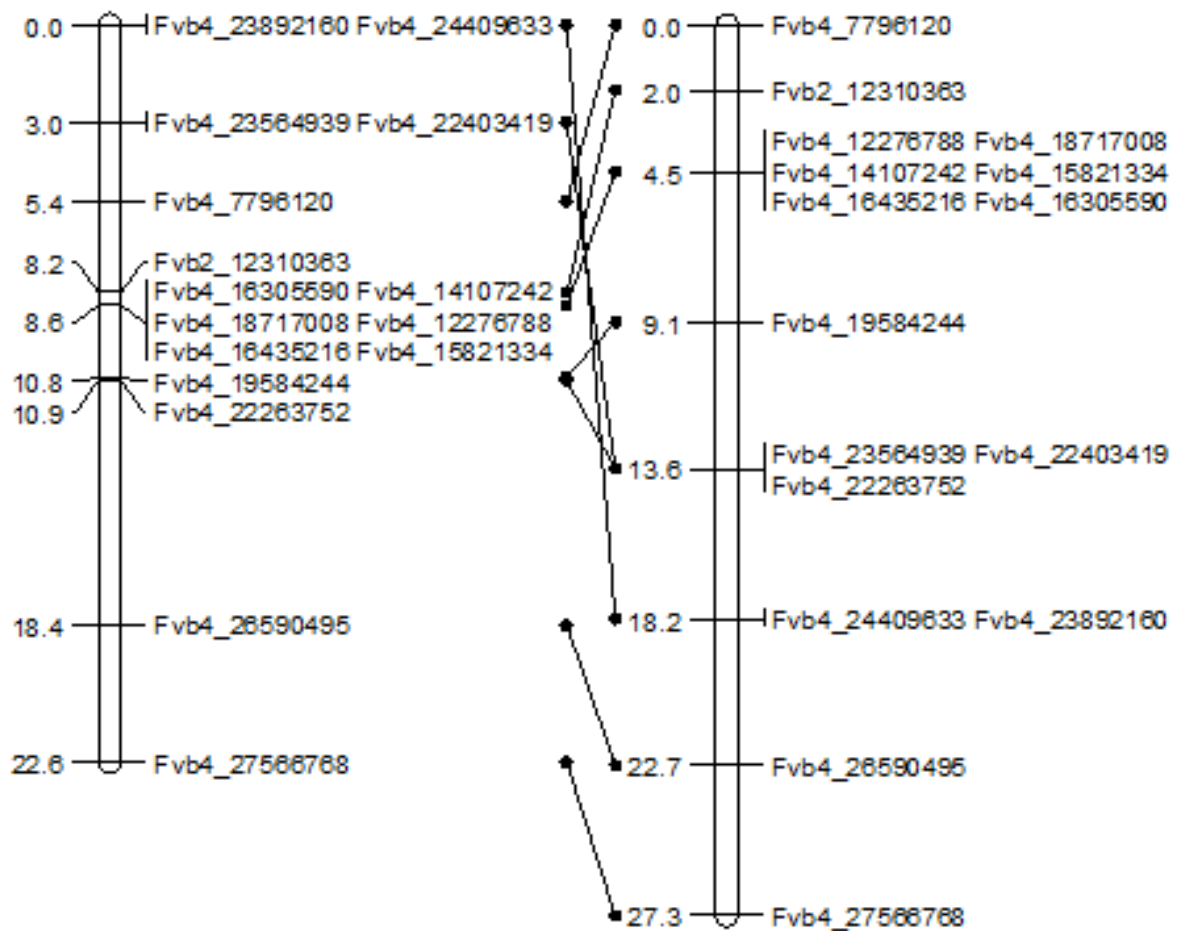

## Korona\_39

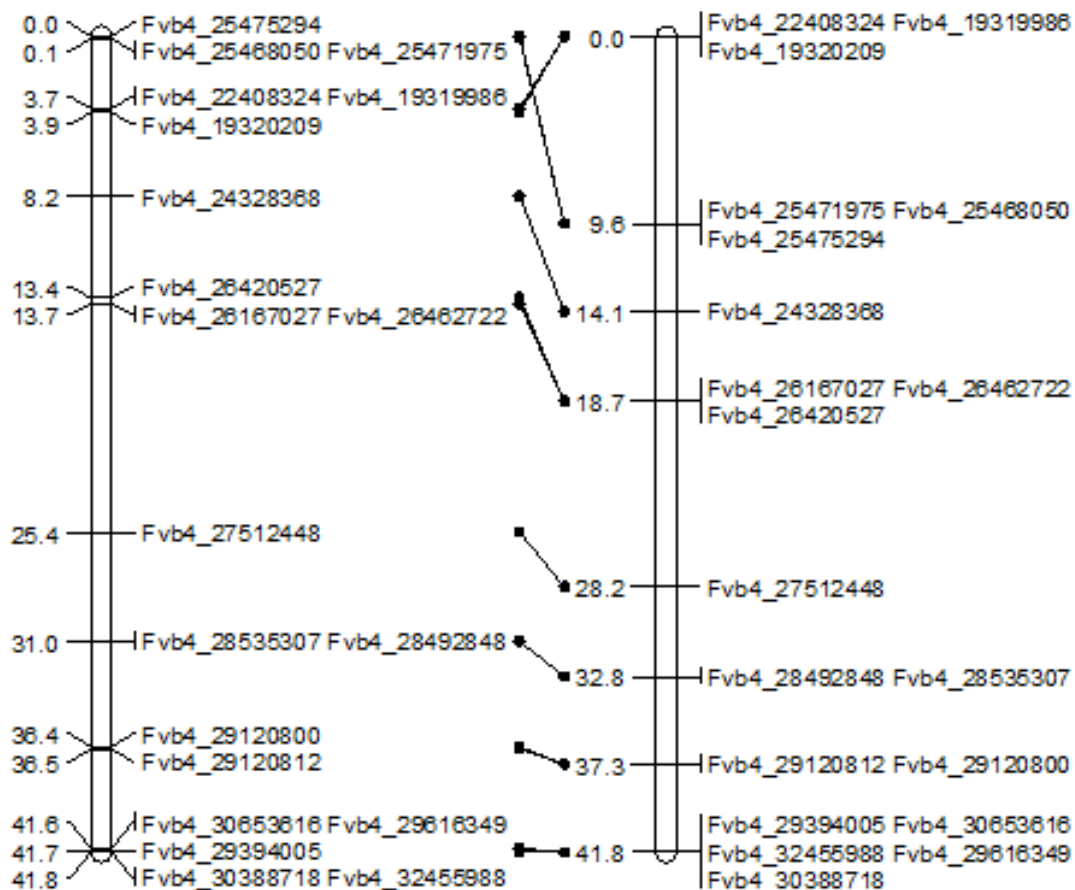

# Fvb 4

## Korona\_43

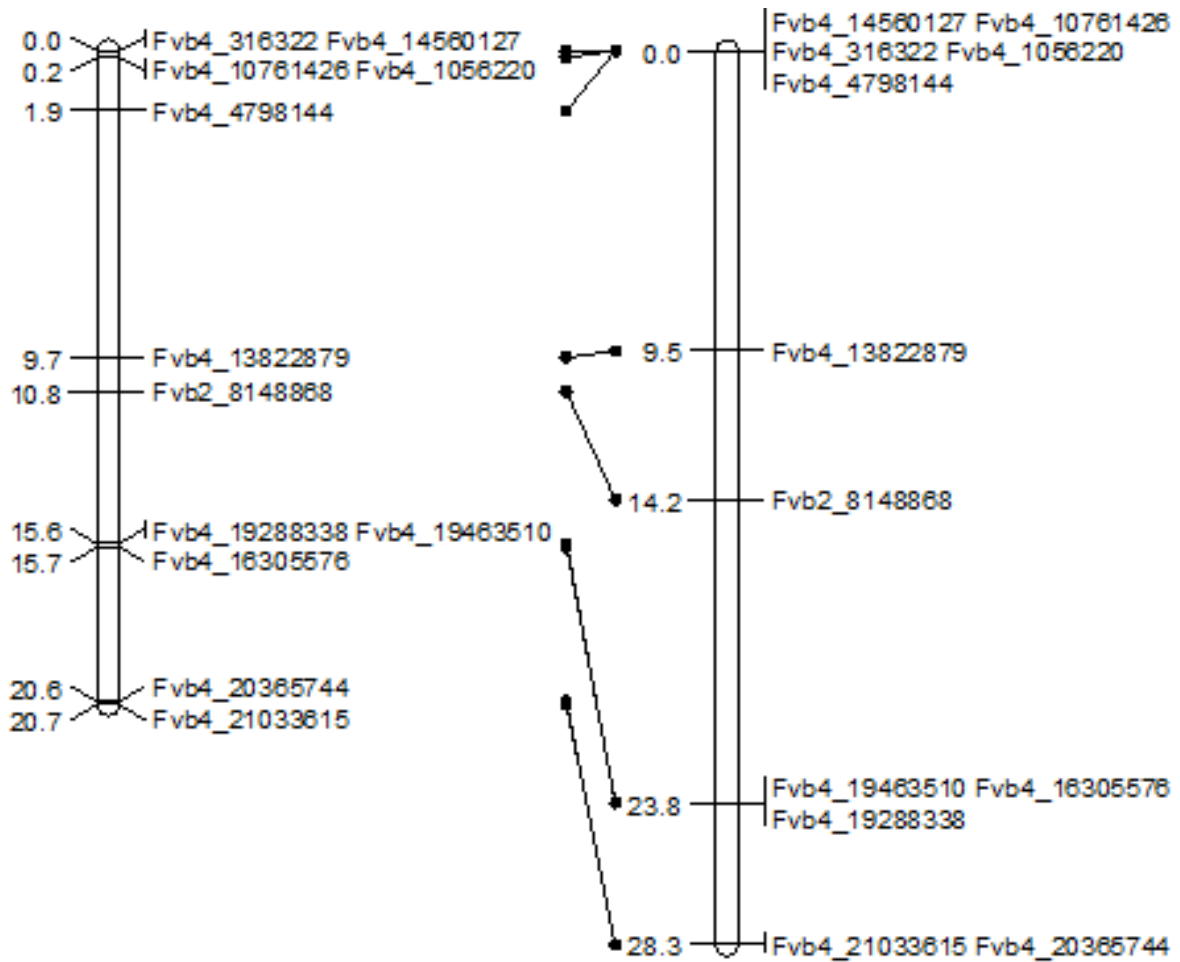

## Korona\_48

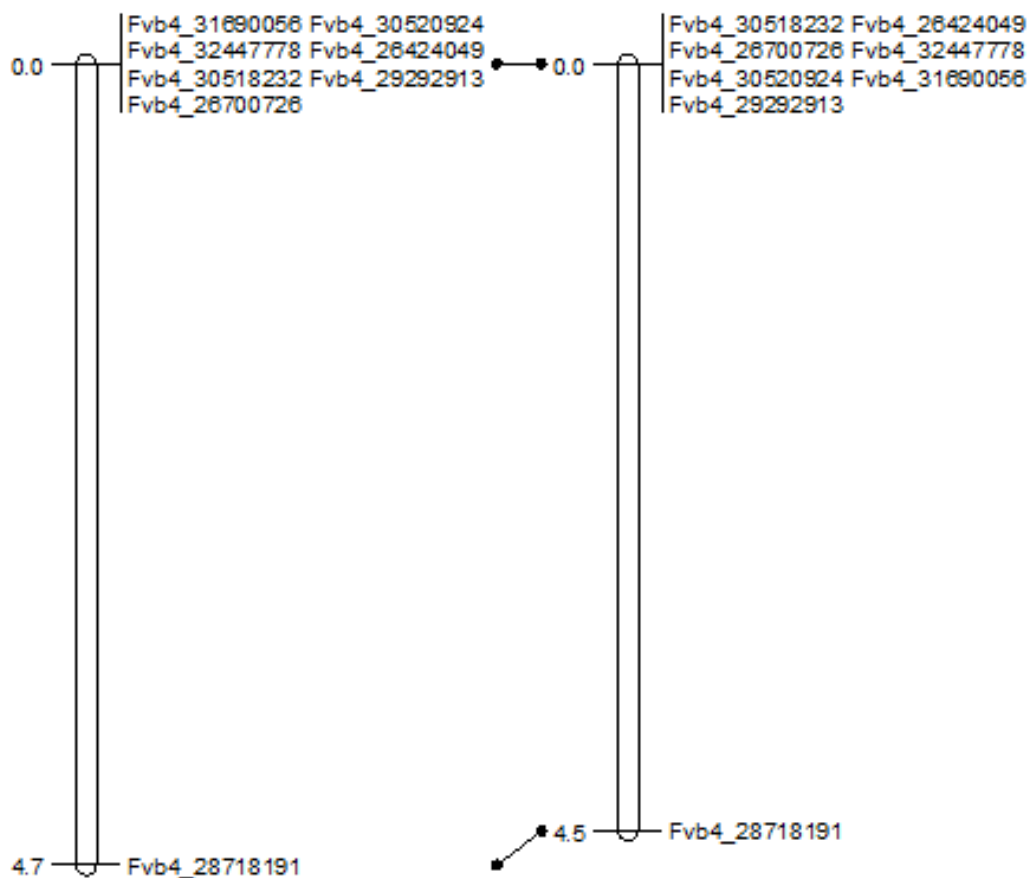

# Fvb 5

## Holiday\_12

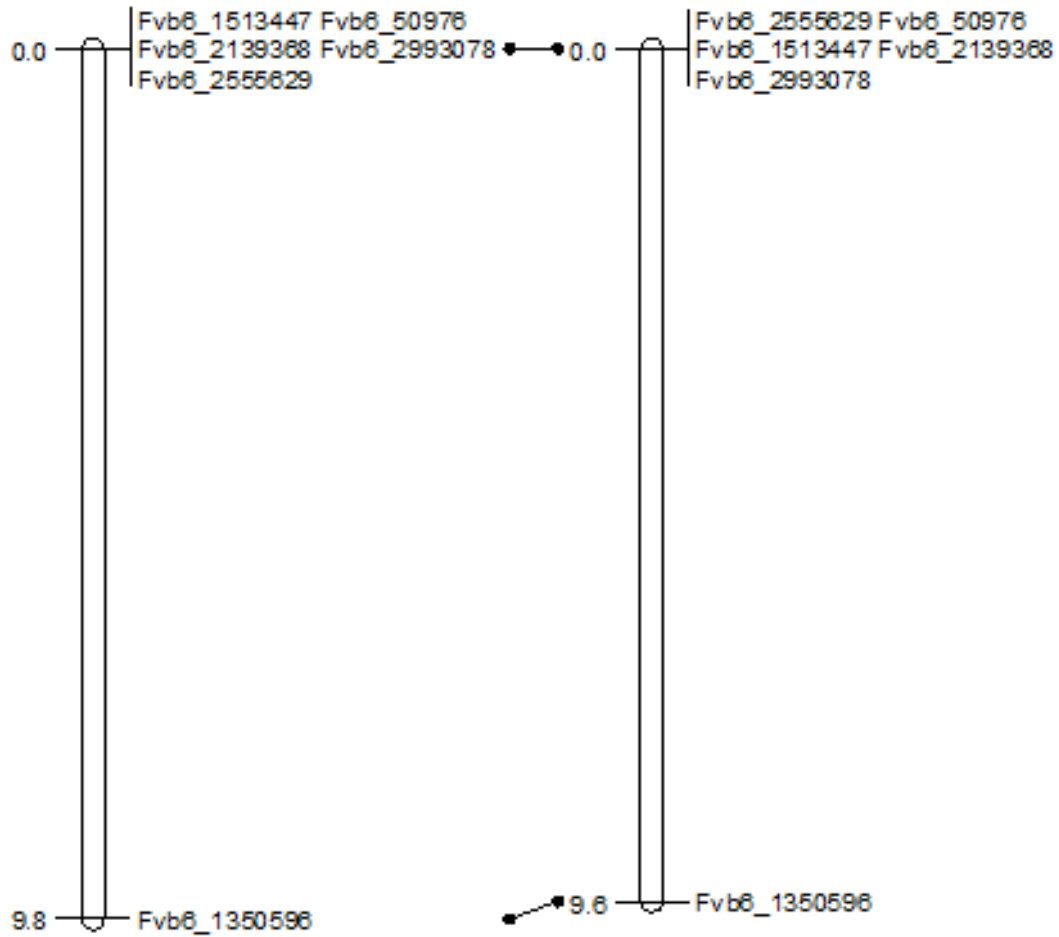

## Holiday\_16

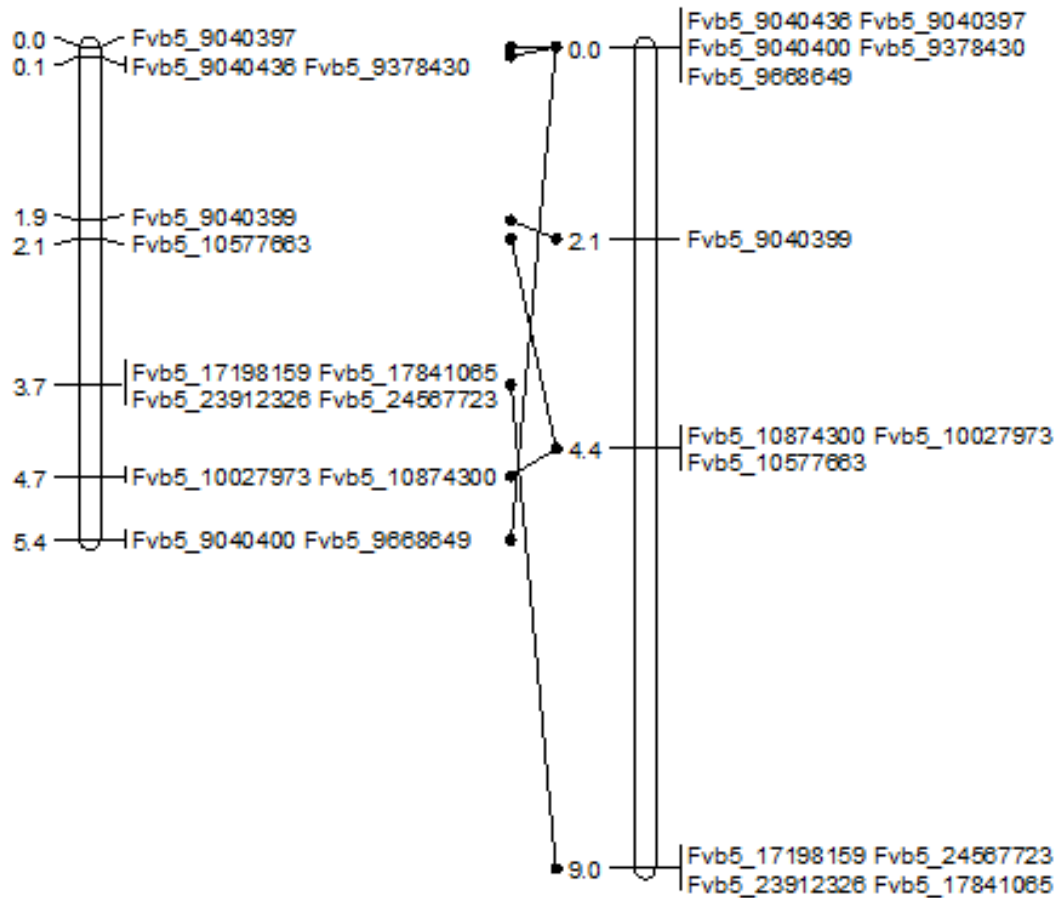

# Fvb 5

## Holiday\_19

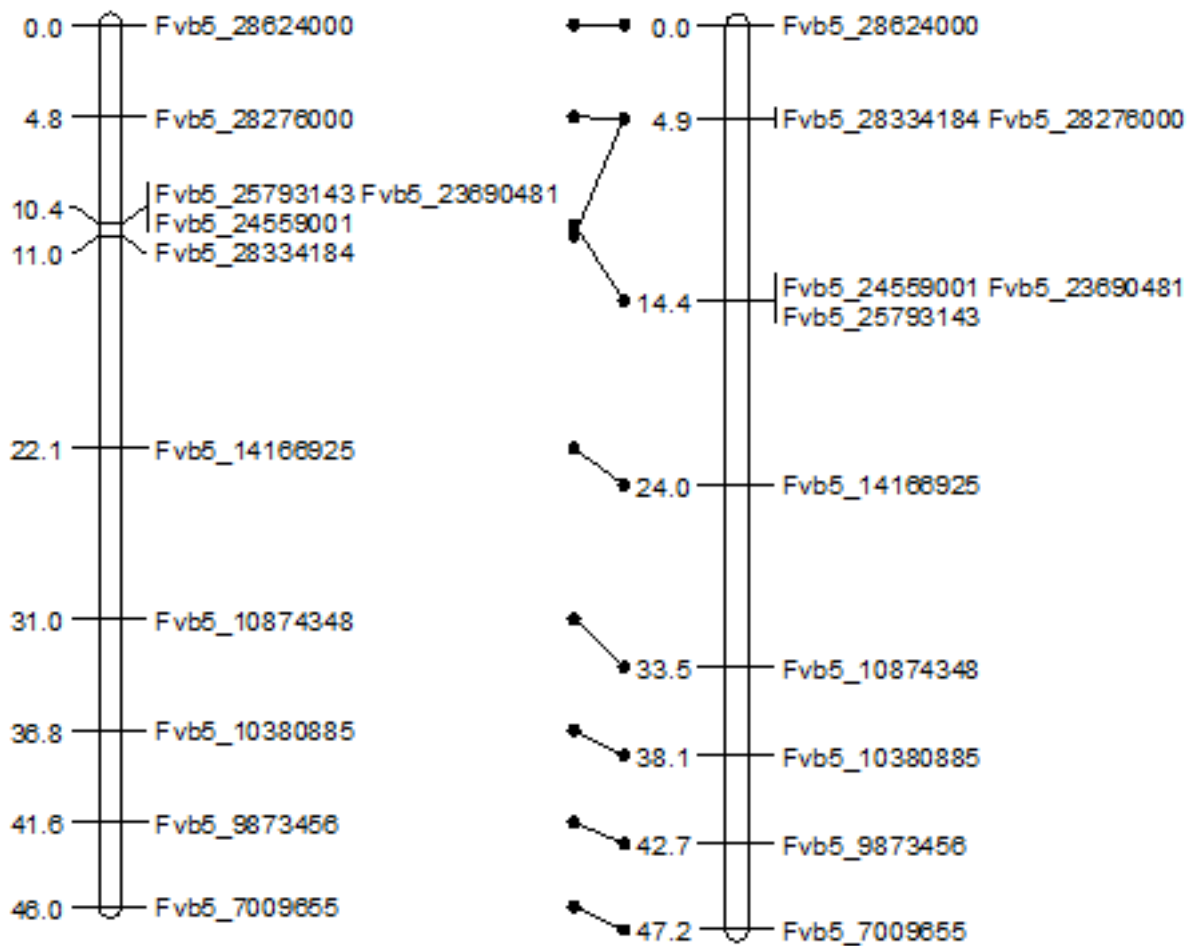

## Holiday\_23

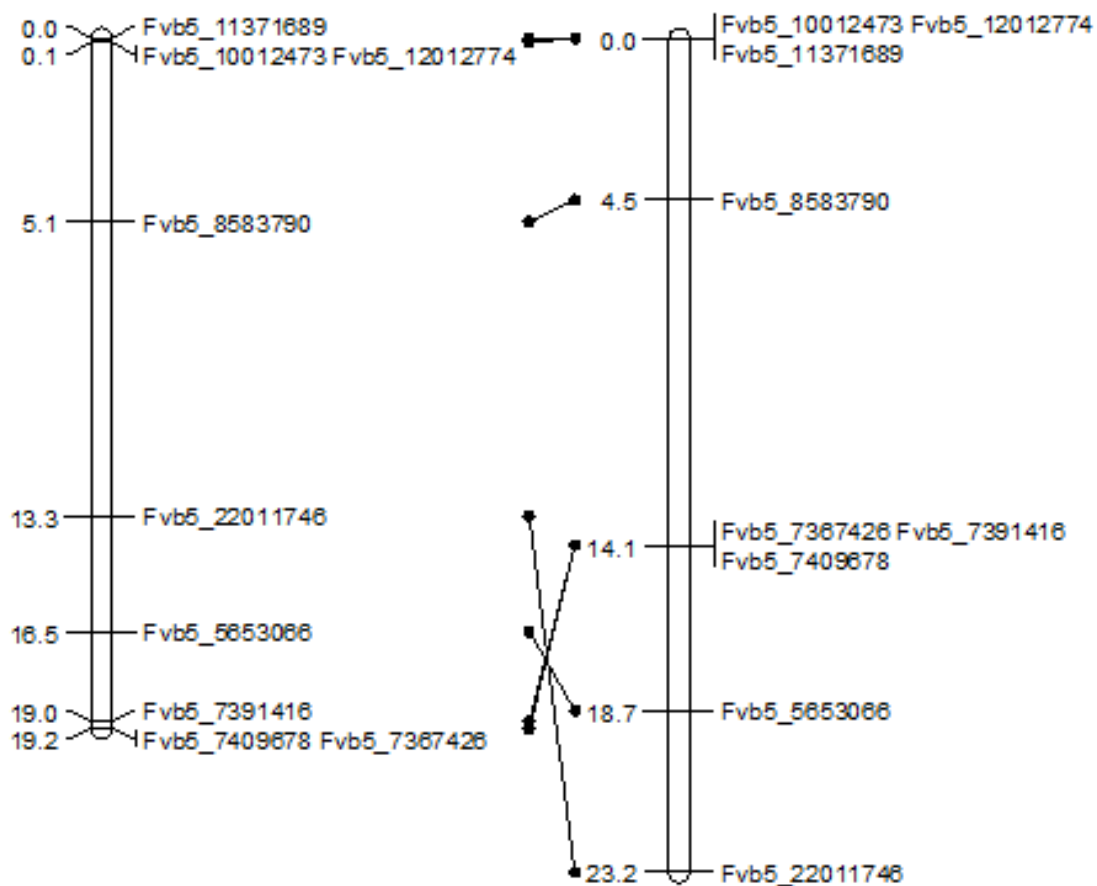

# Fvb 5

## Korona\_1

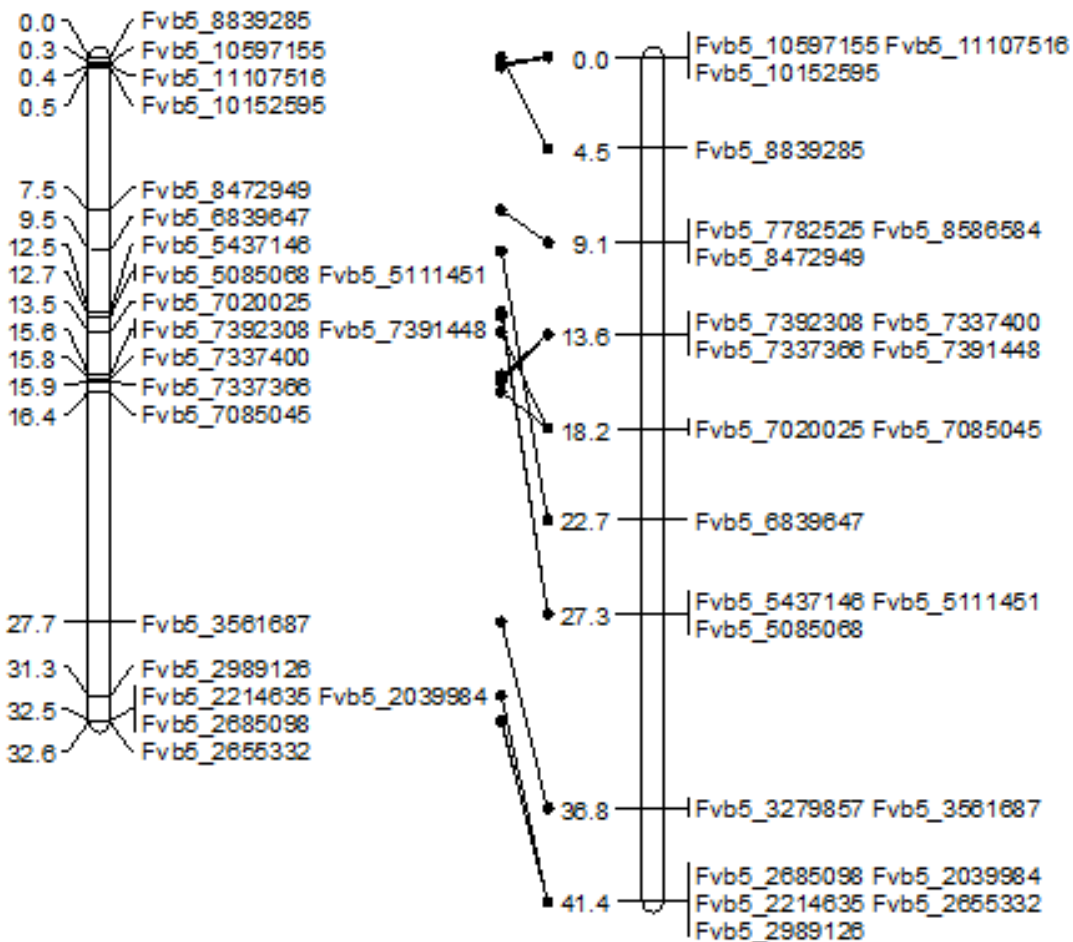

## Korona\_5

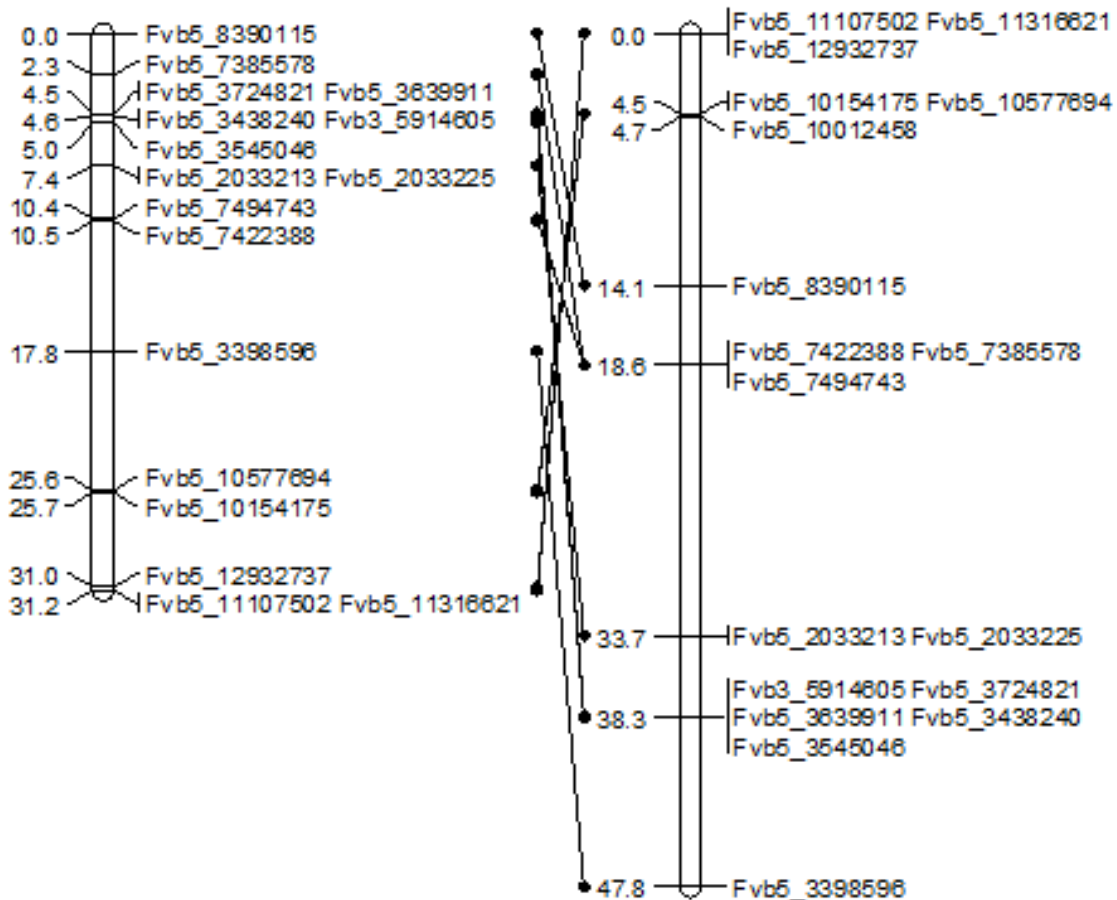

# Fvb 5

## Korona\_9

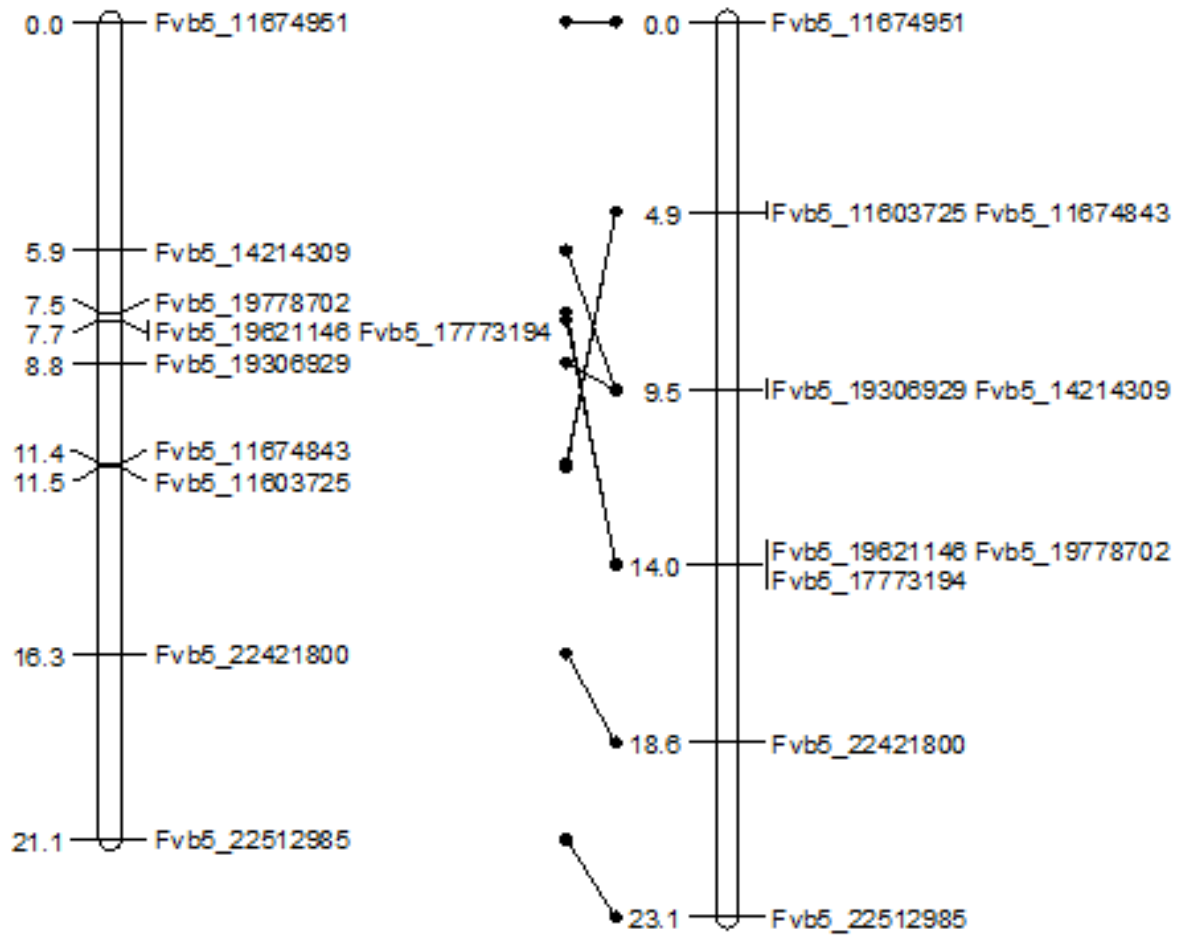

## Korona\_44

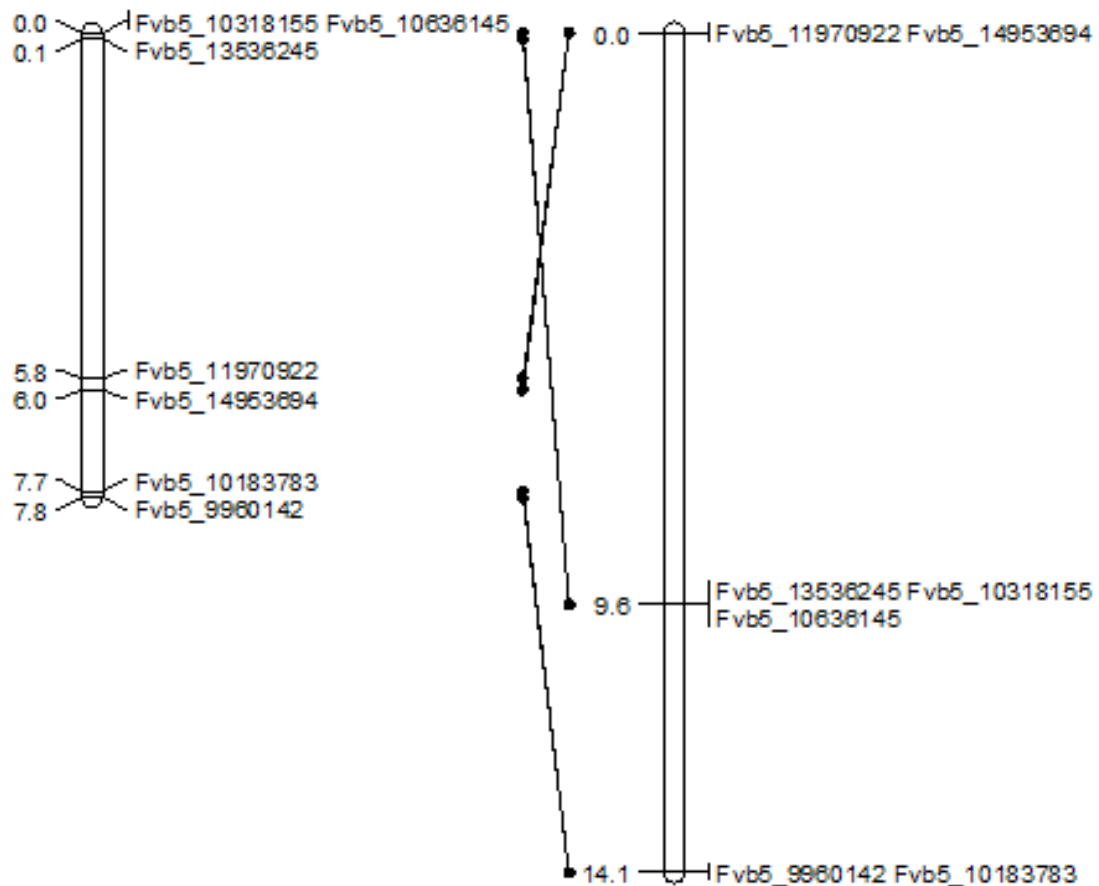

# Fvb 5

## Korona\_47

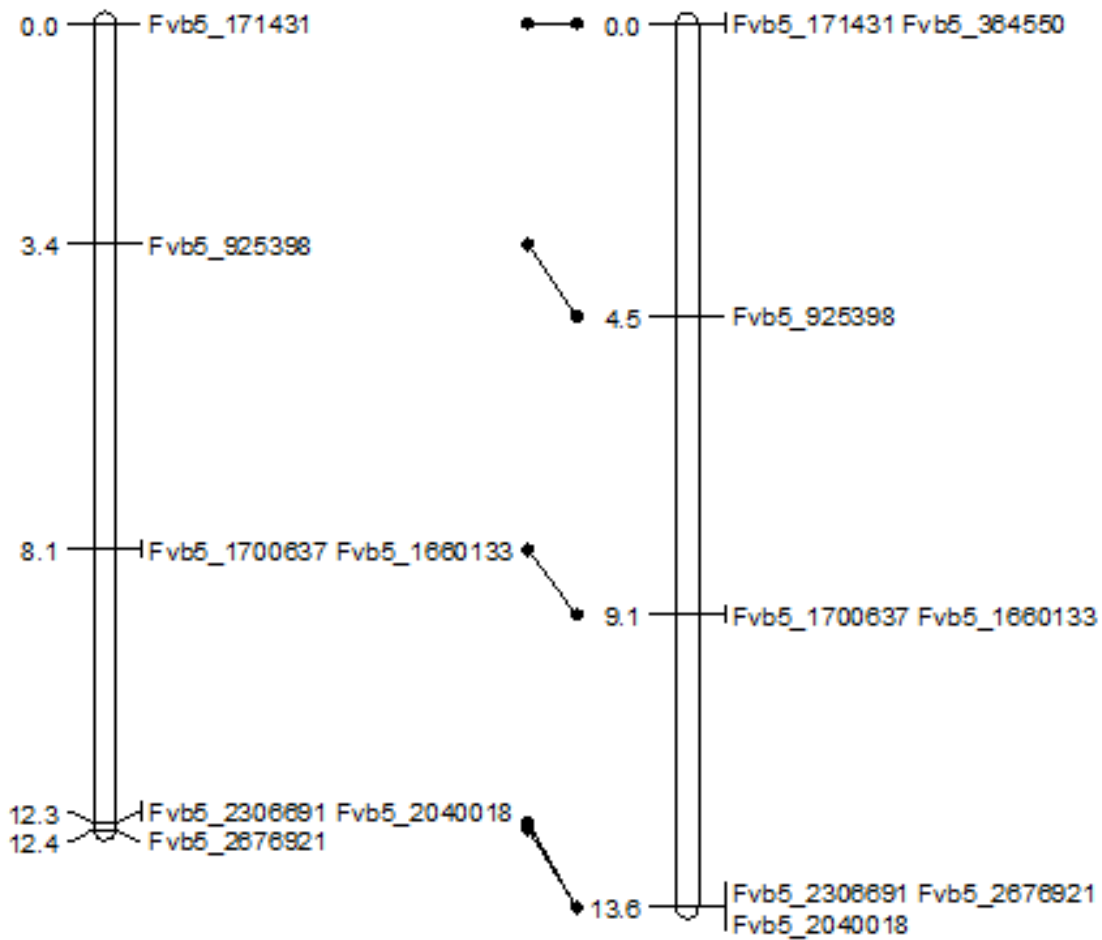

## Korona\_55

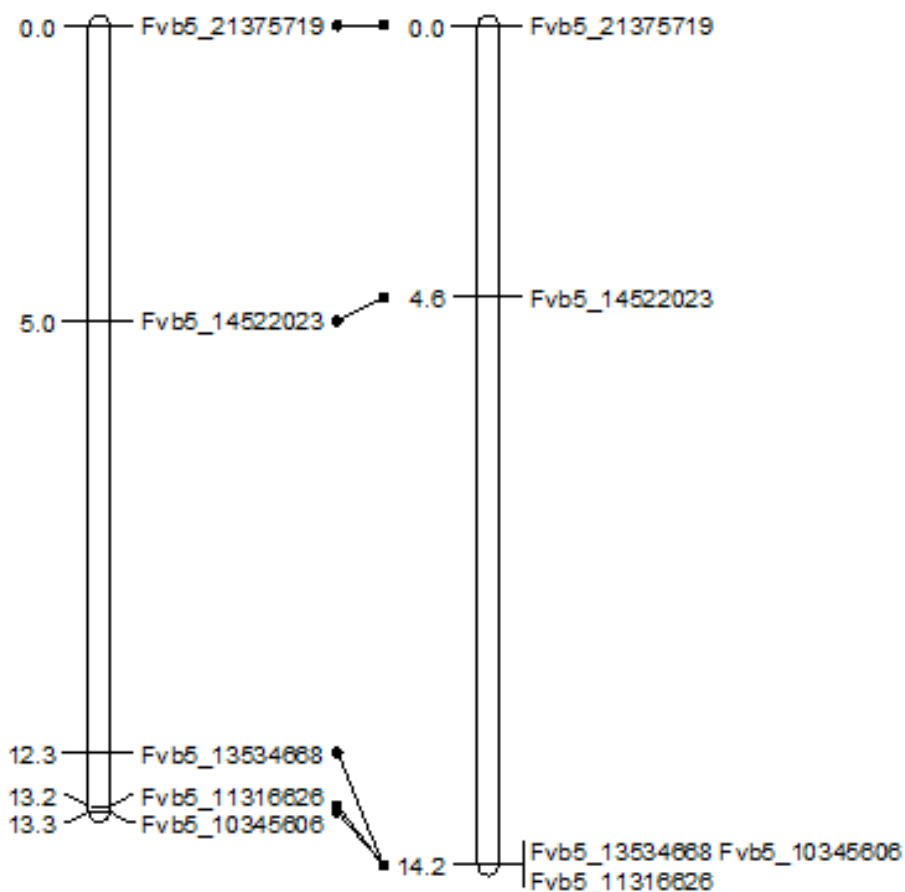



# Fvb 6

## Holiday\_2

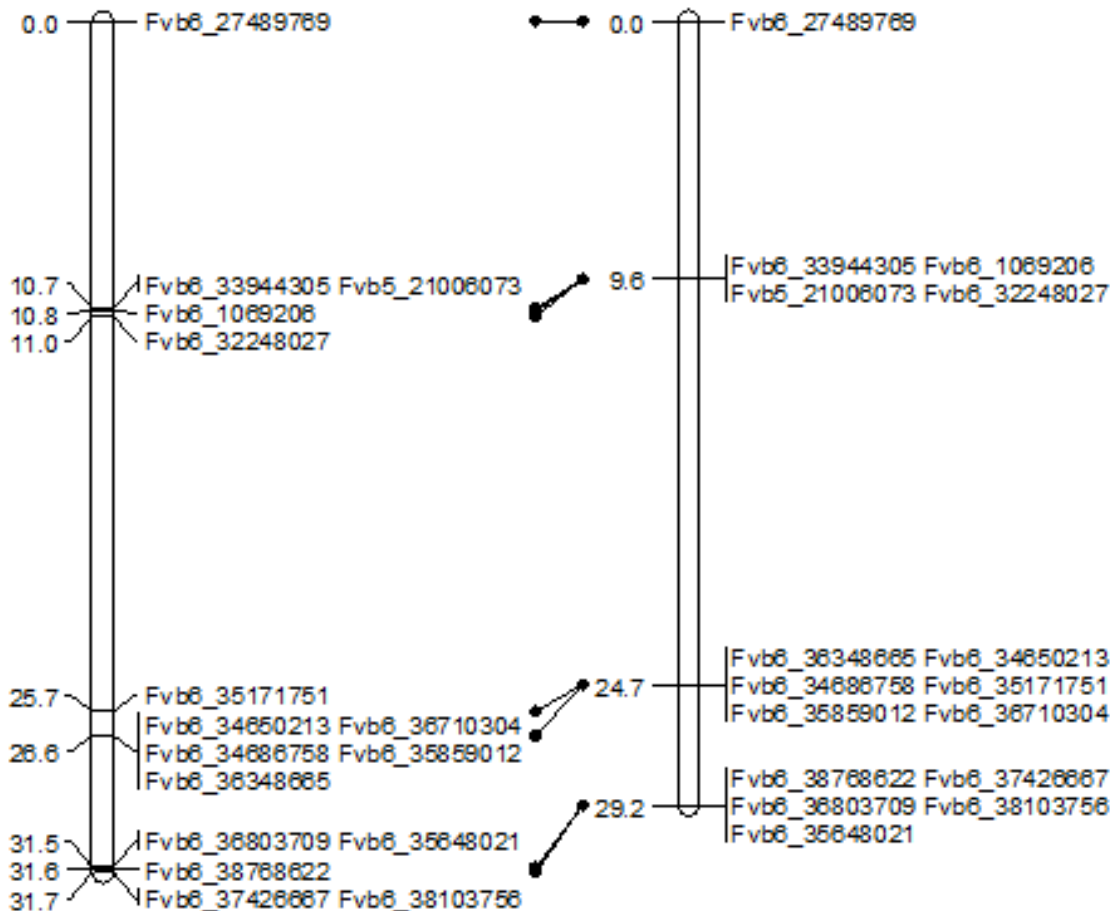

## Holiday\_3

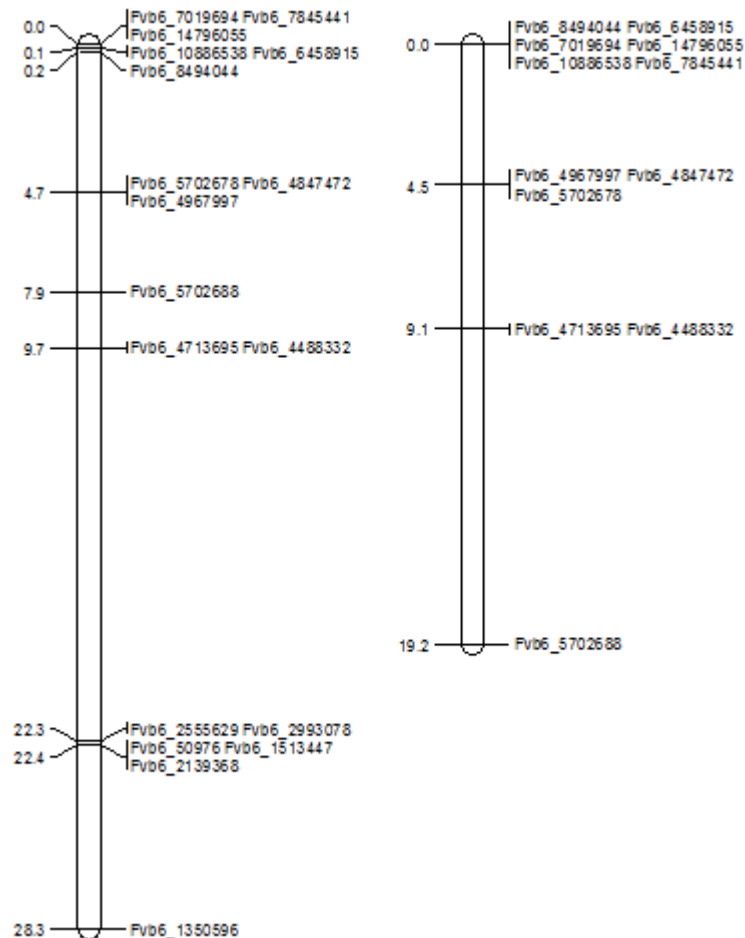

# Fvb 6

## Holiday\_5

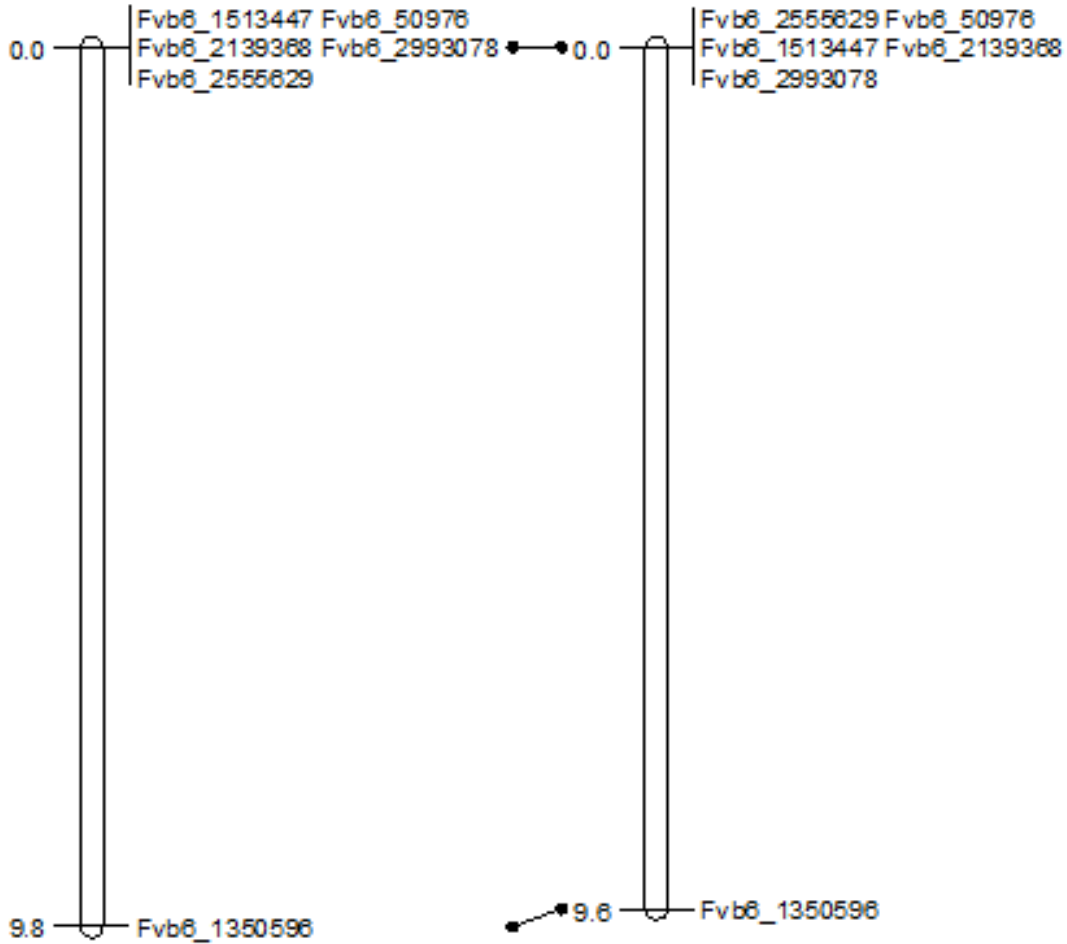

## Holiday\_8

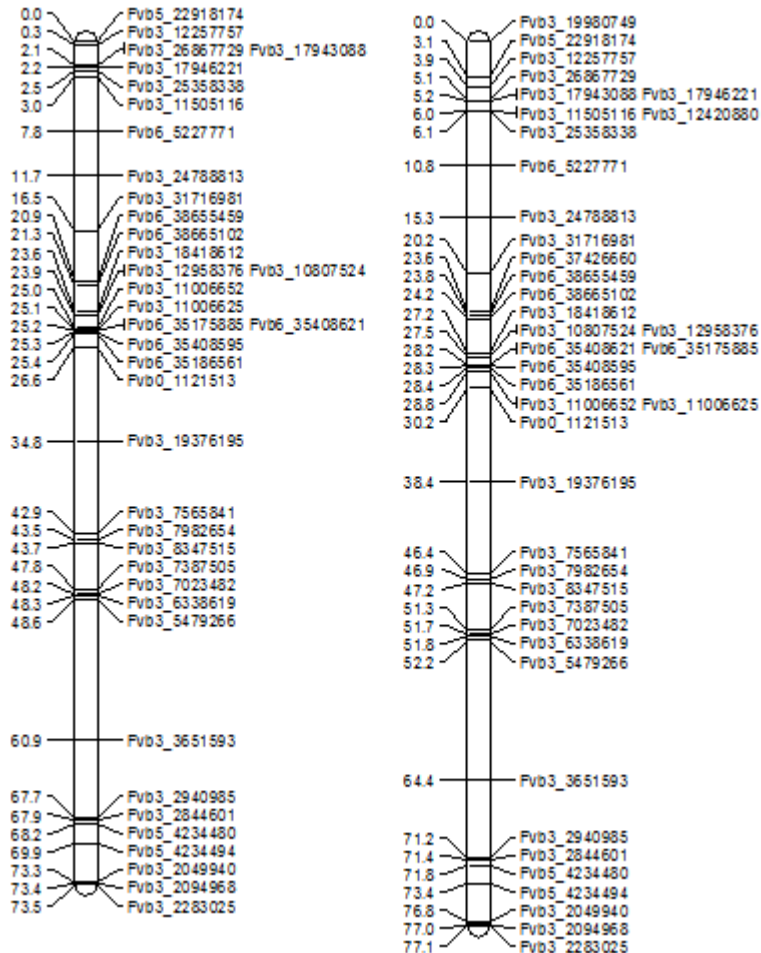

# Fvb 6

## Holiday\_14

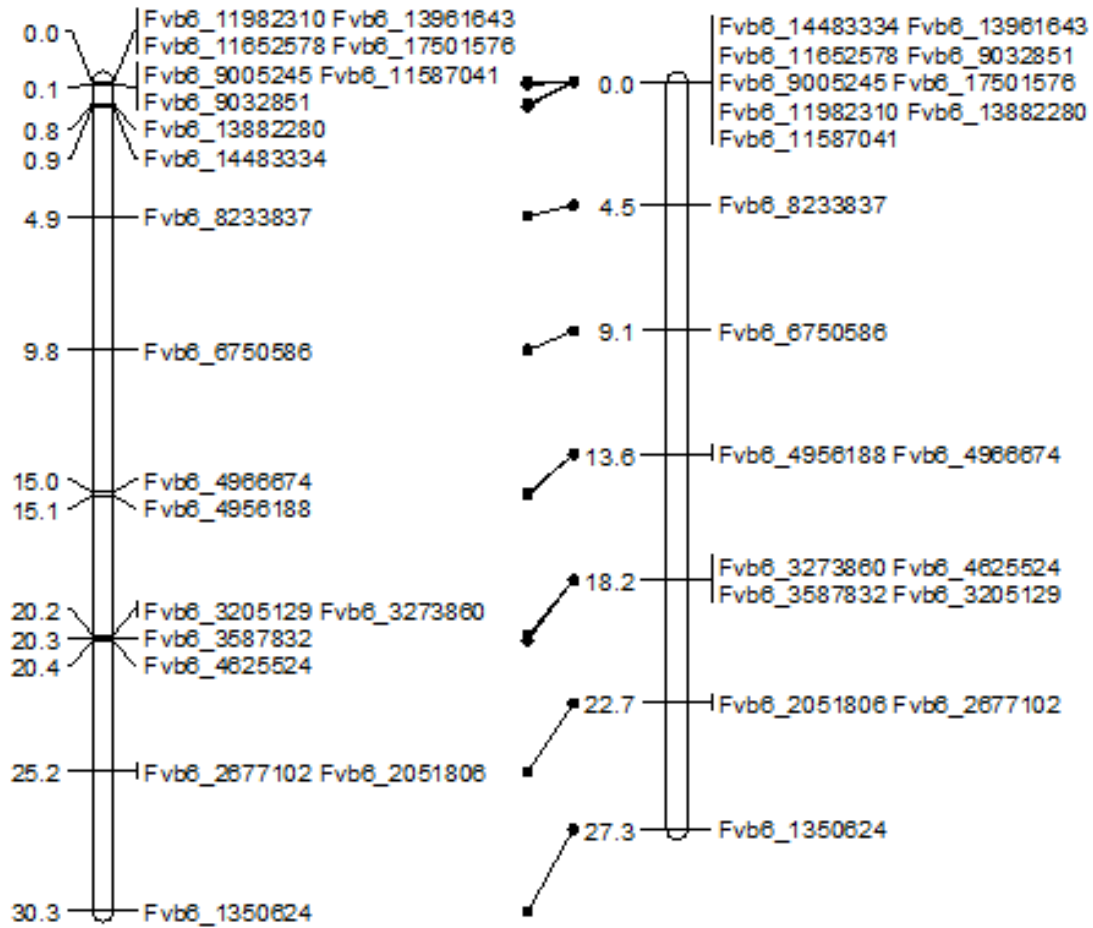

## Holiday\_21

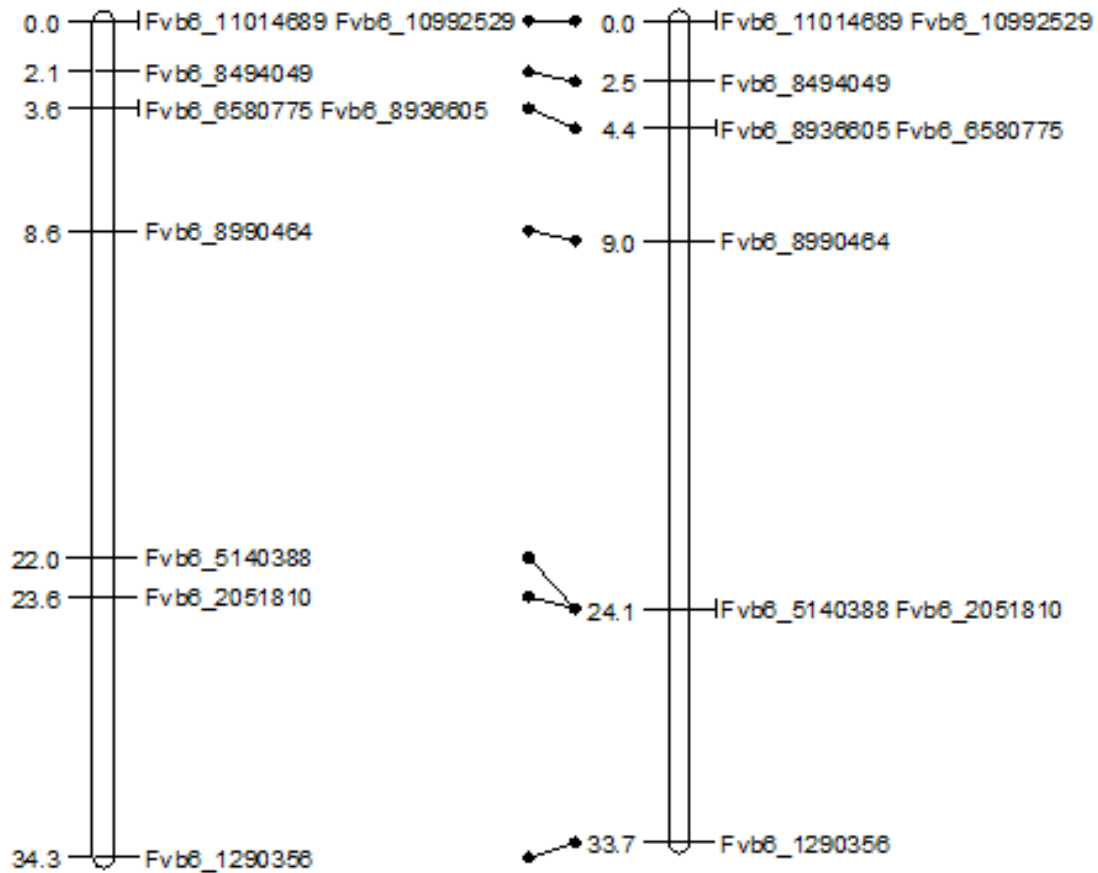

# Fvb 6

## Korona\_20

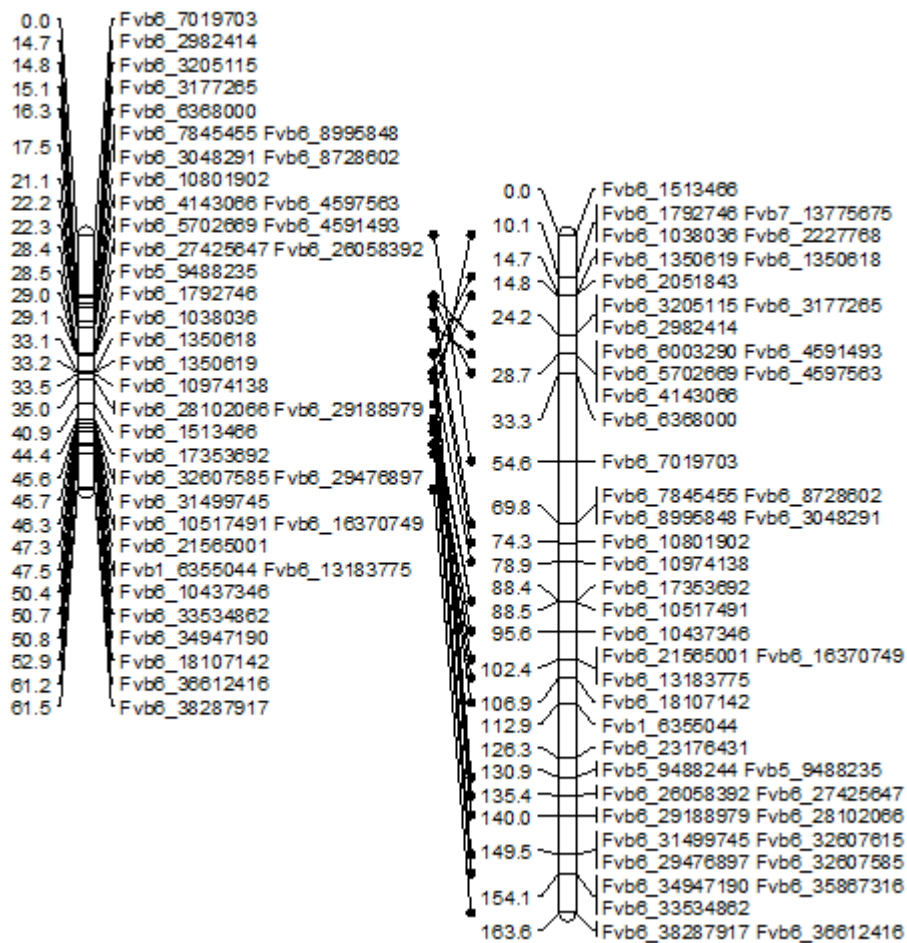

## Korona\_28

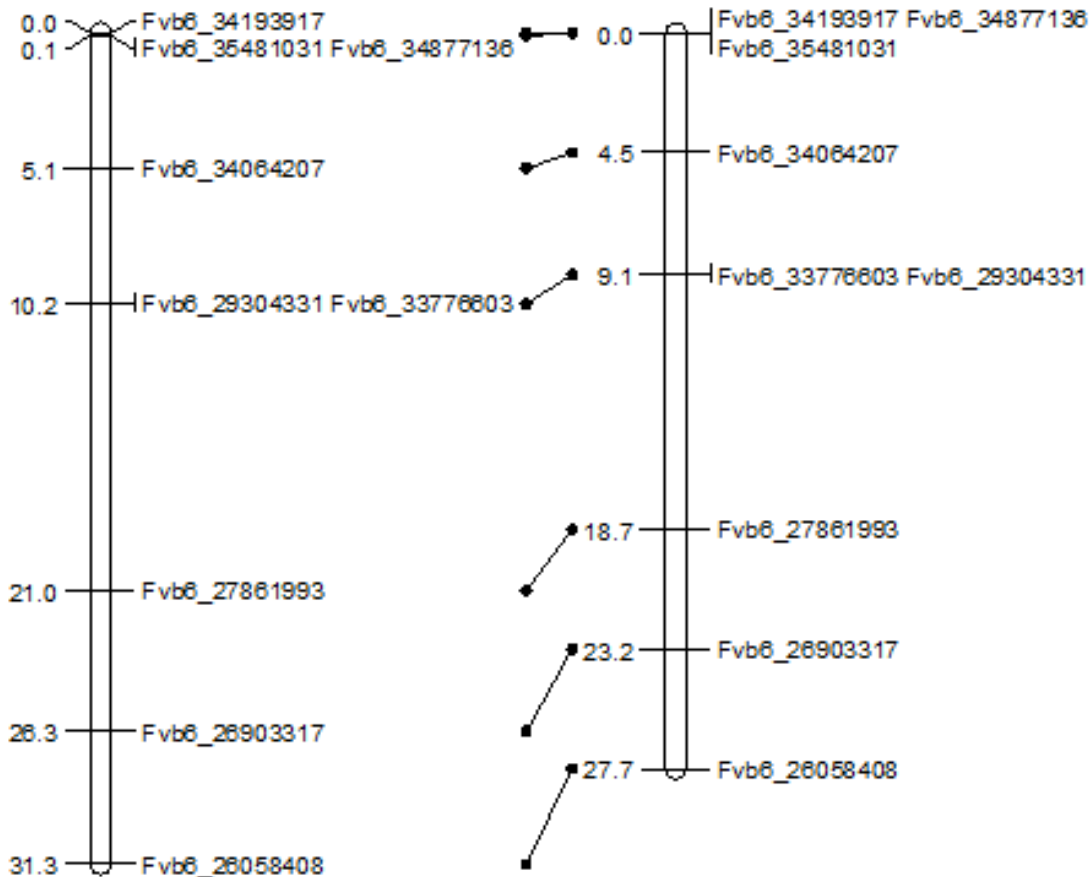

# Fvb 6

## Korona\_38

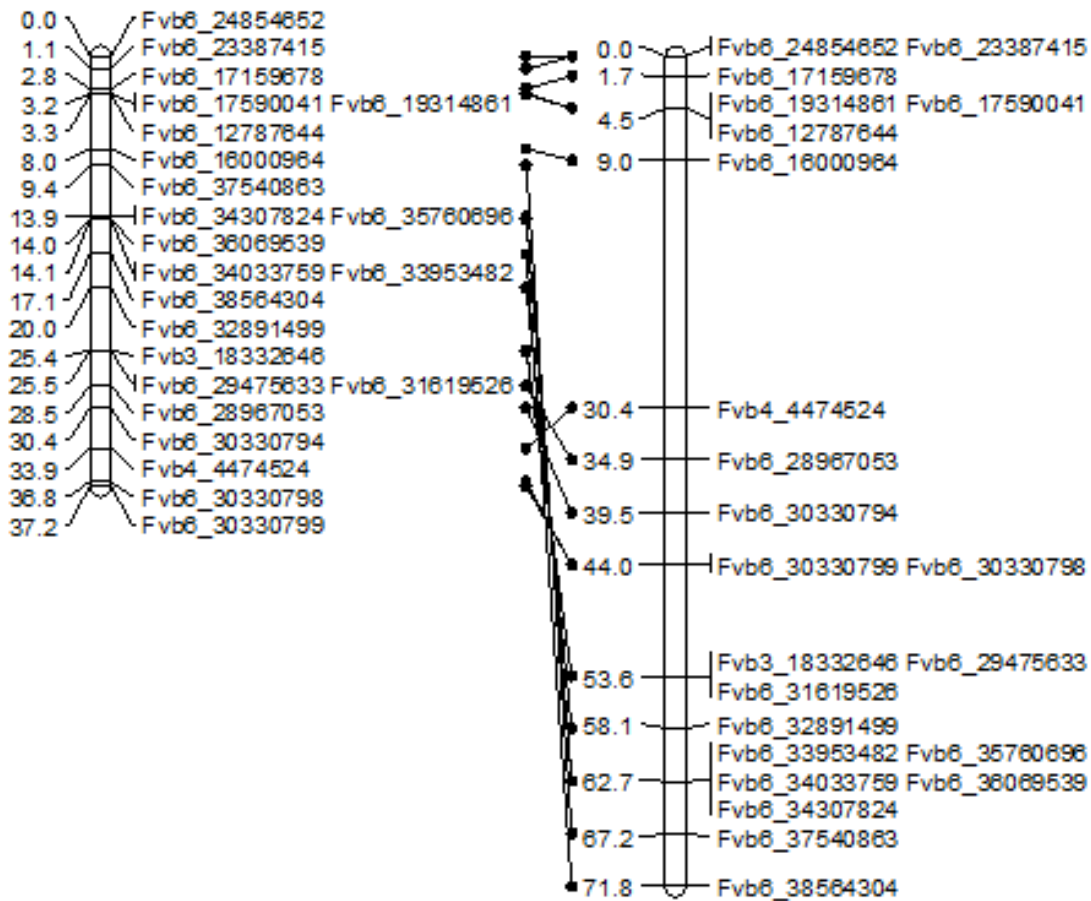

## Korona\_42

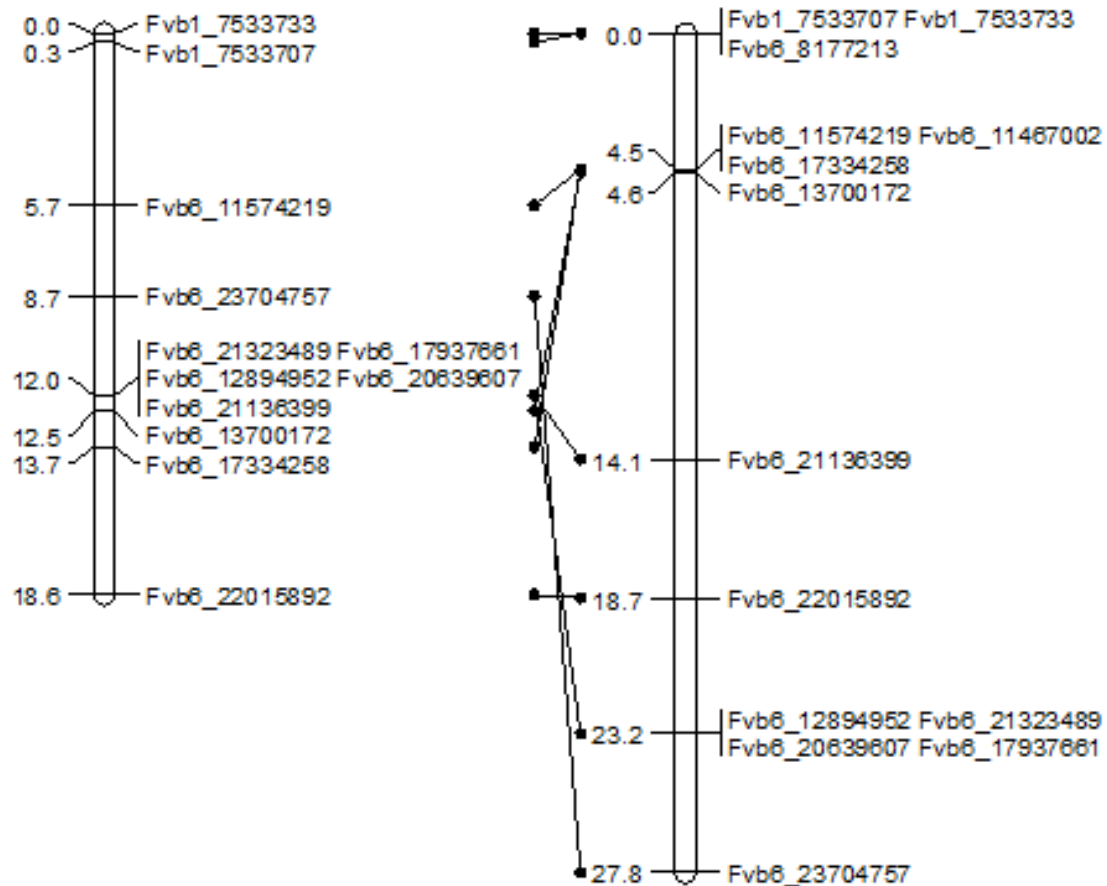

# Fvb 7

## Holiday\_18

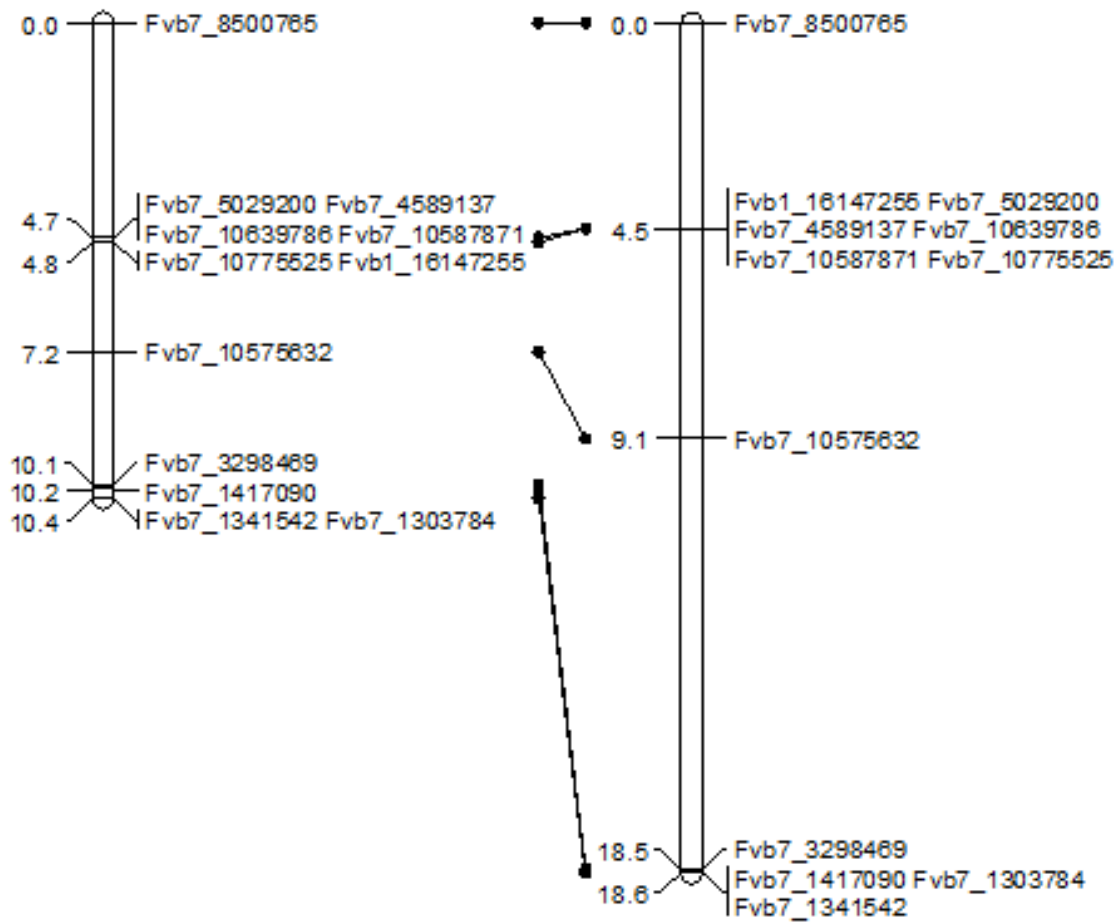

## Holiday\_26

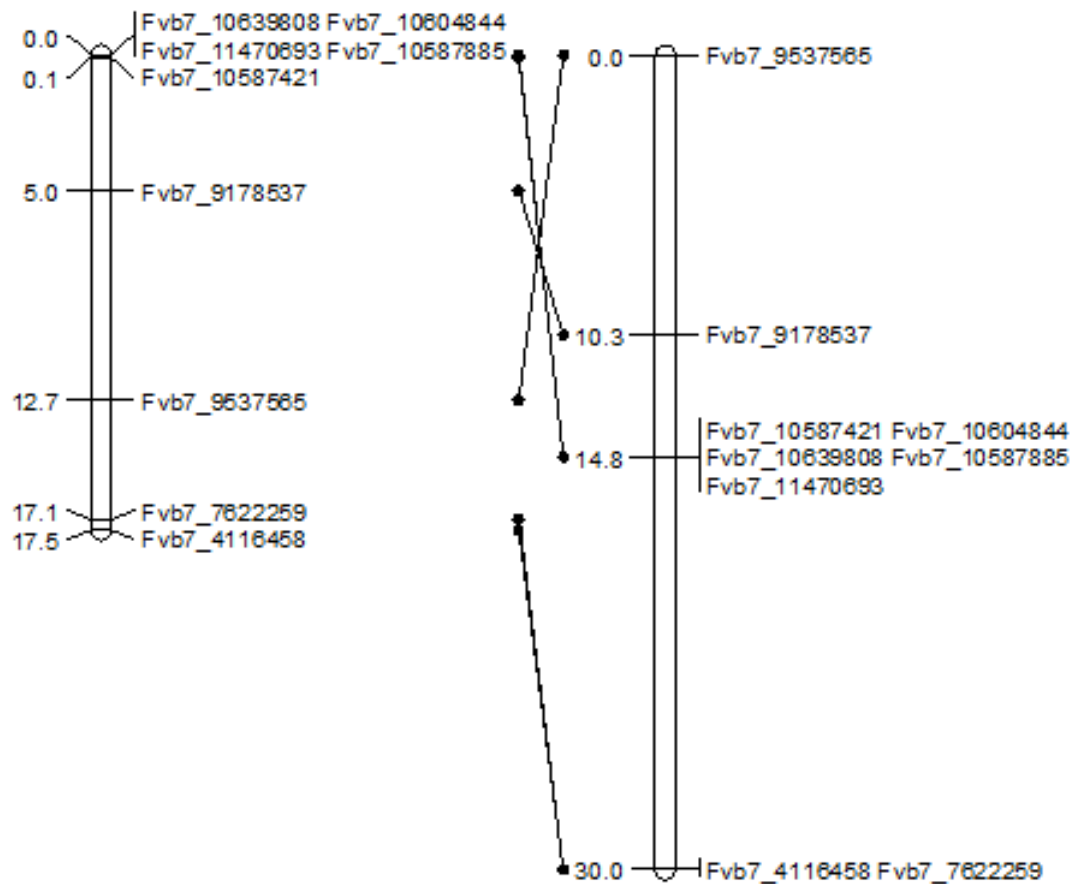

# Fvb 7

## Korona\_7

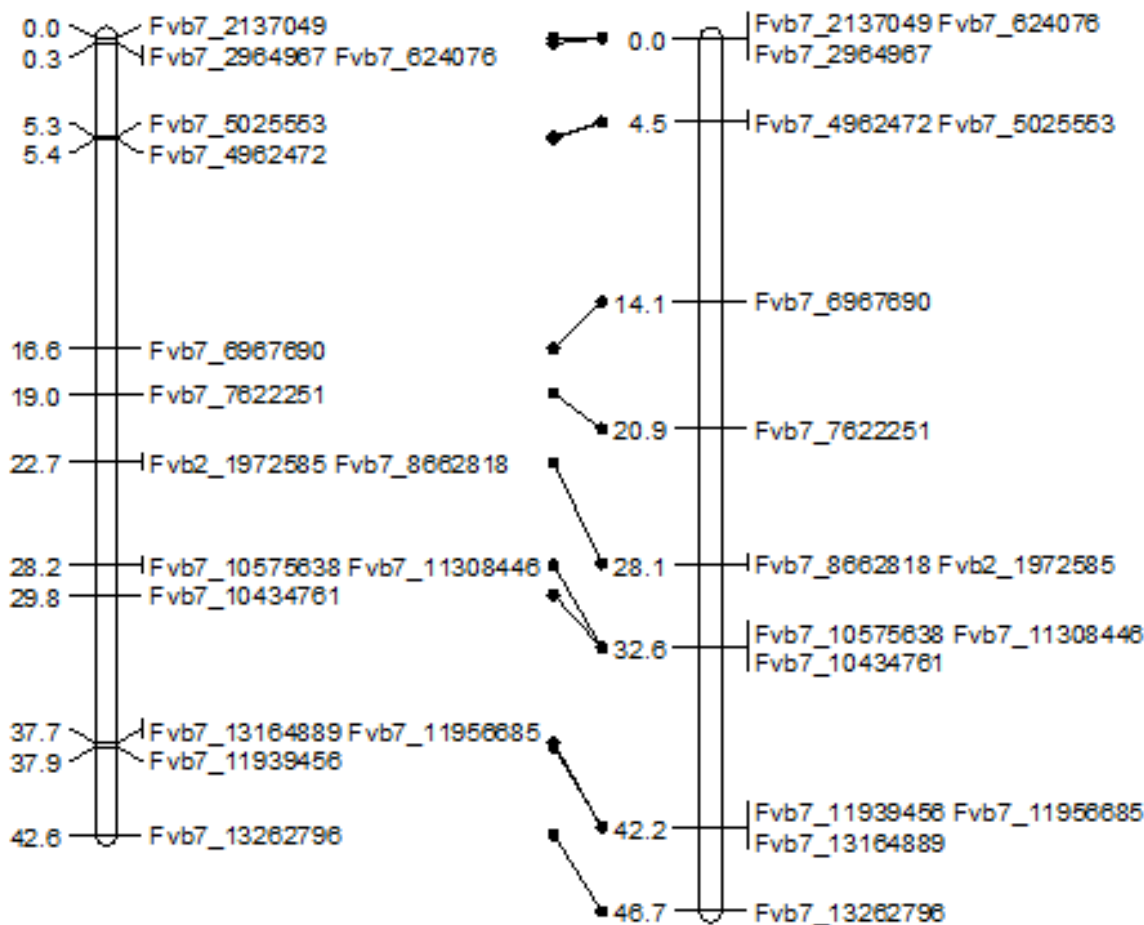

## Korona\_50

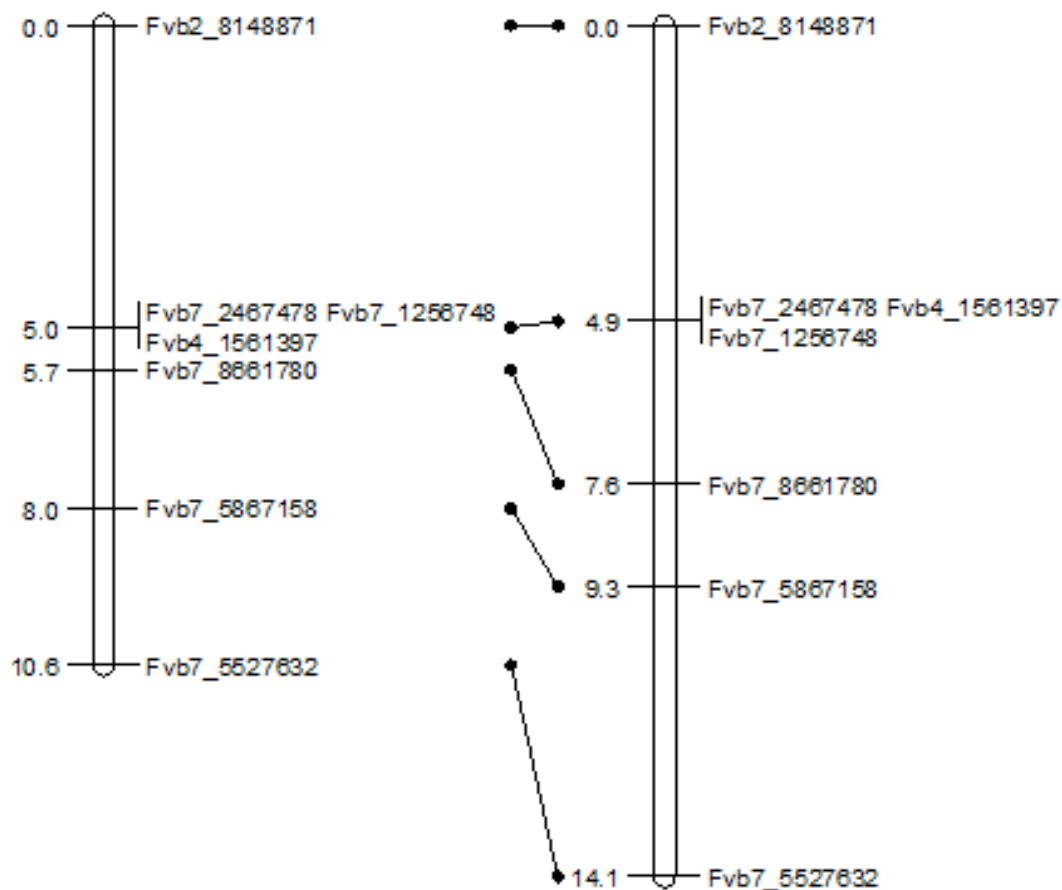

# Fvb 7

## Korona\_53

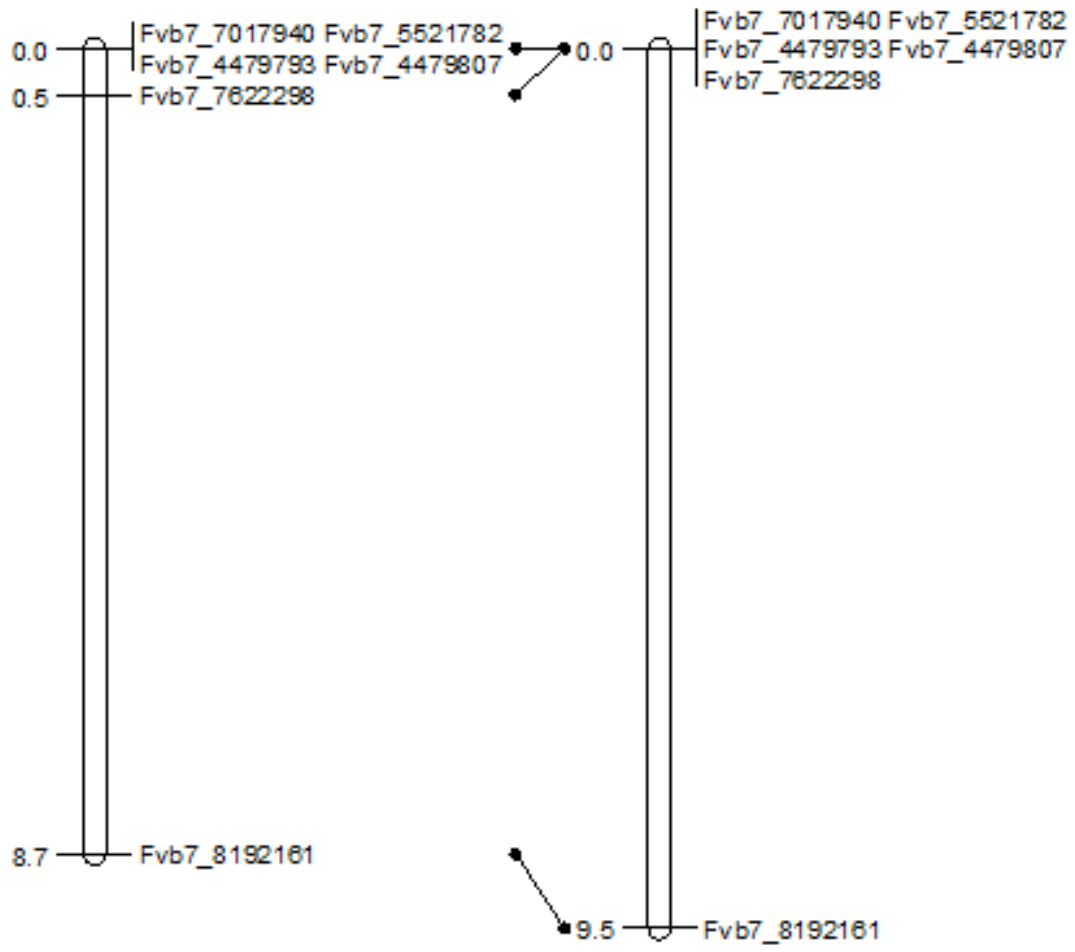

Supplement: peerj-05-3731-s002.pdf [file peerj-05-3731-s002.pdf]
