# Supplementary material for: Genotyping-by-sequencing enables linkage mapping in three octoploid cultivated strawberry families
Source: PubMed Central journal article supplement (PMC5581533; doi:10.7717/peerj.3731), 2017-08-30

# Fvb 1

## Tribute\_6

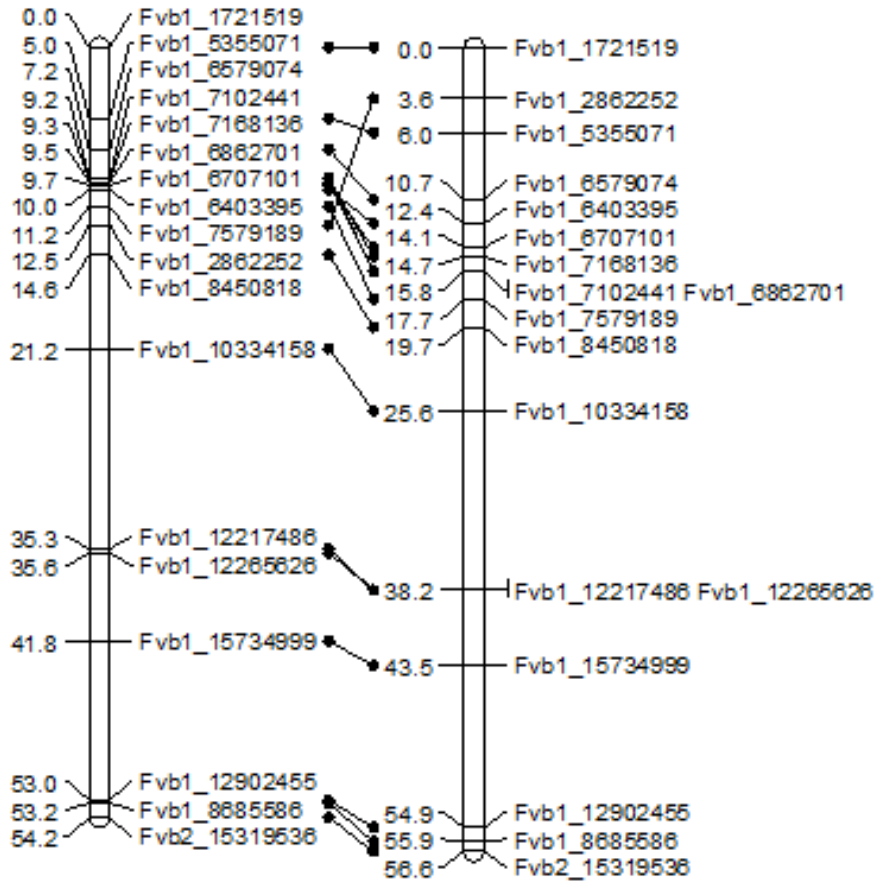

## Tribute\_8

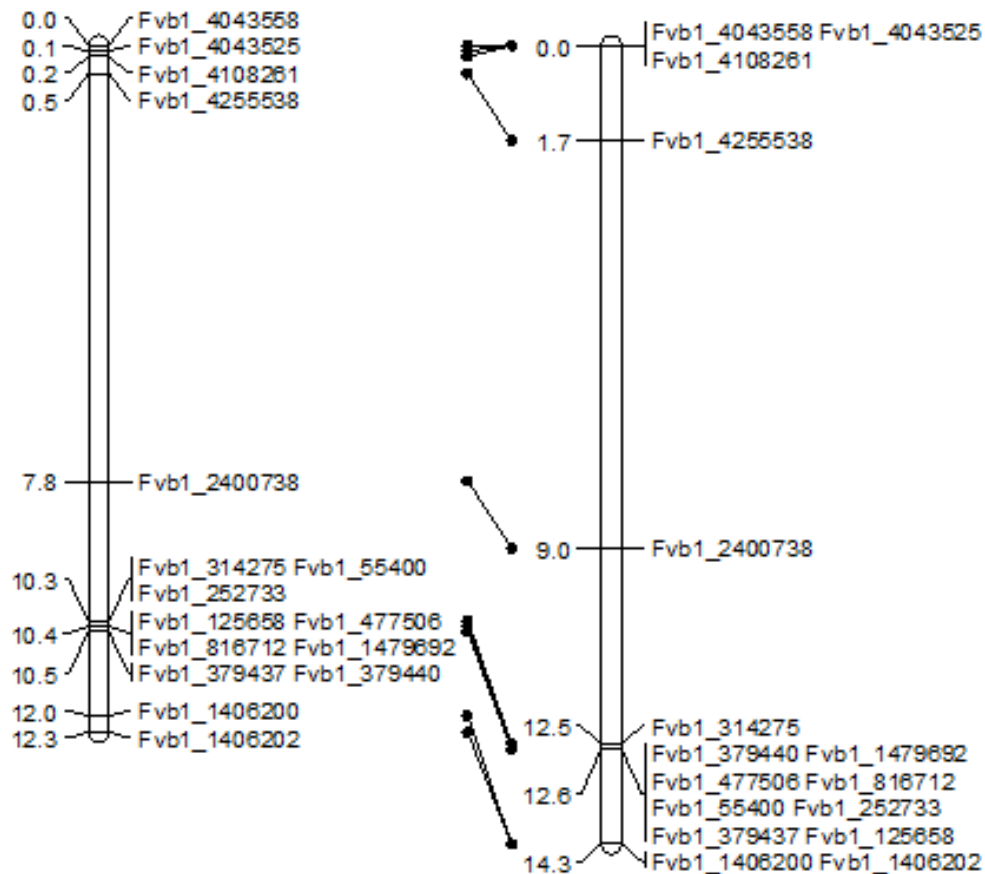

# Fvb 1

## Tribute\_17

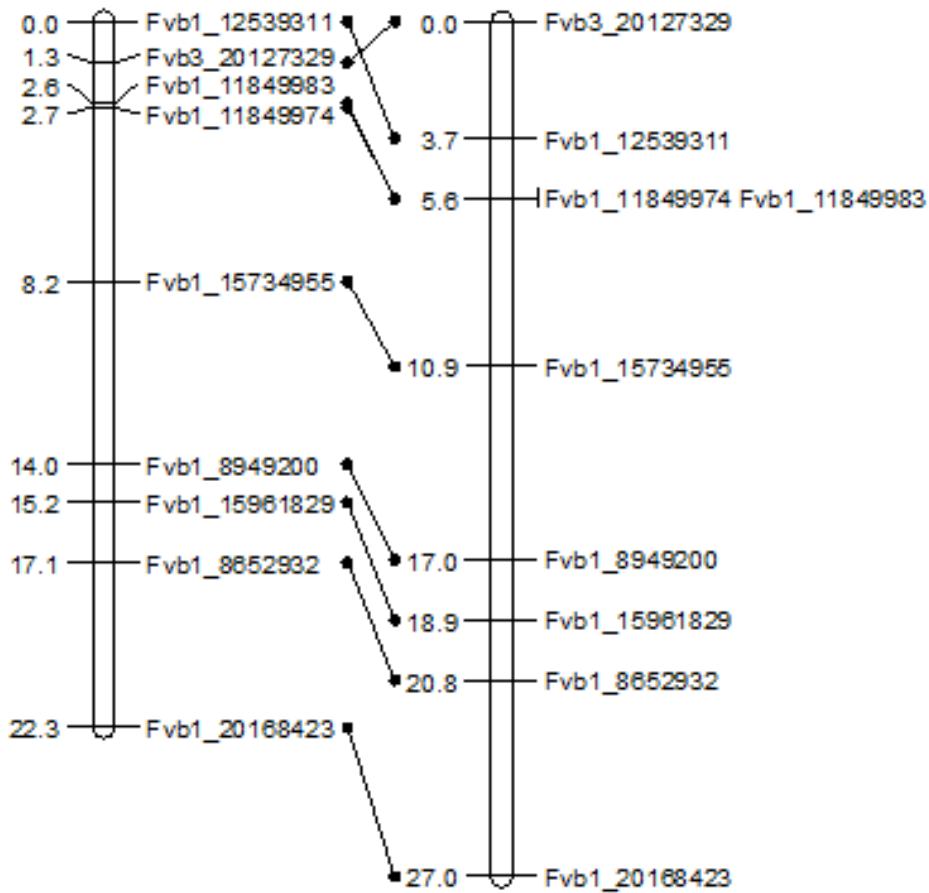

## Tribute\_19

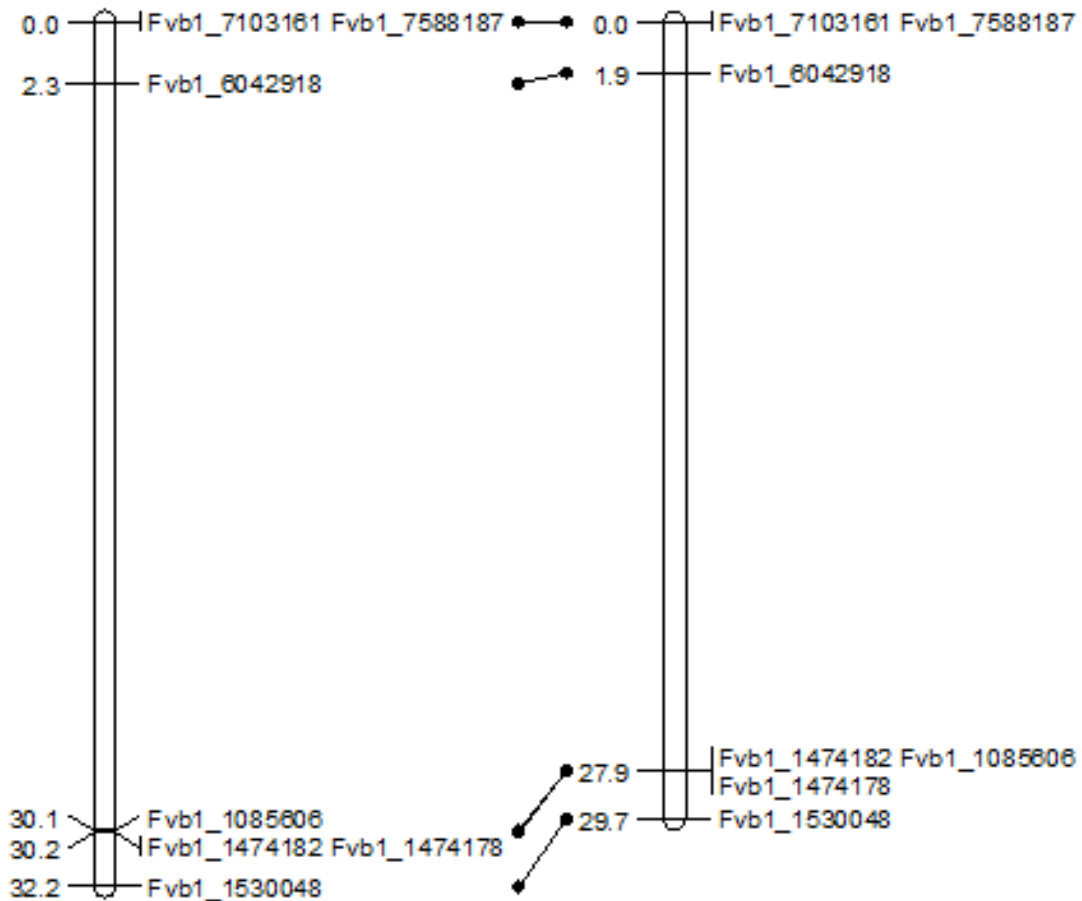

# Fvb 1

## Honeoye\_15

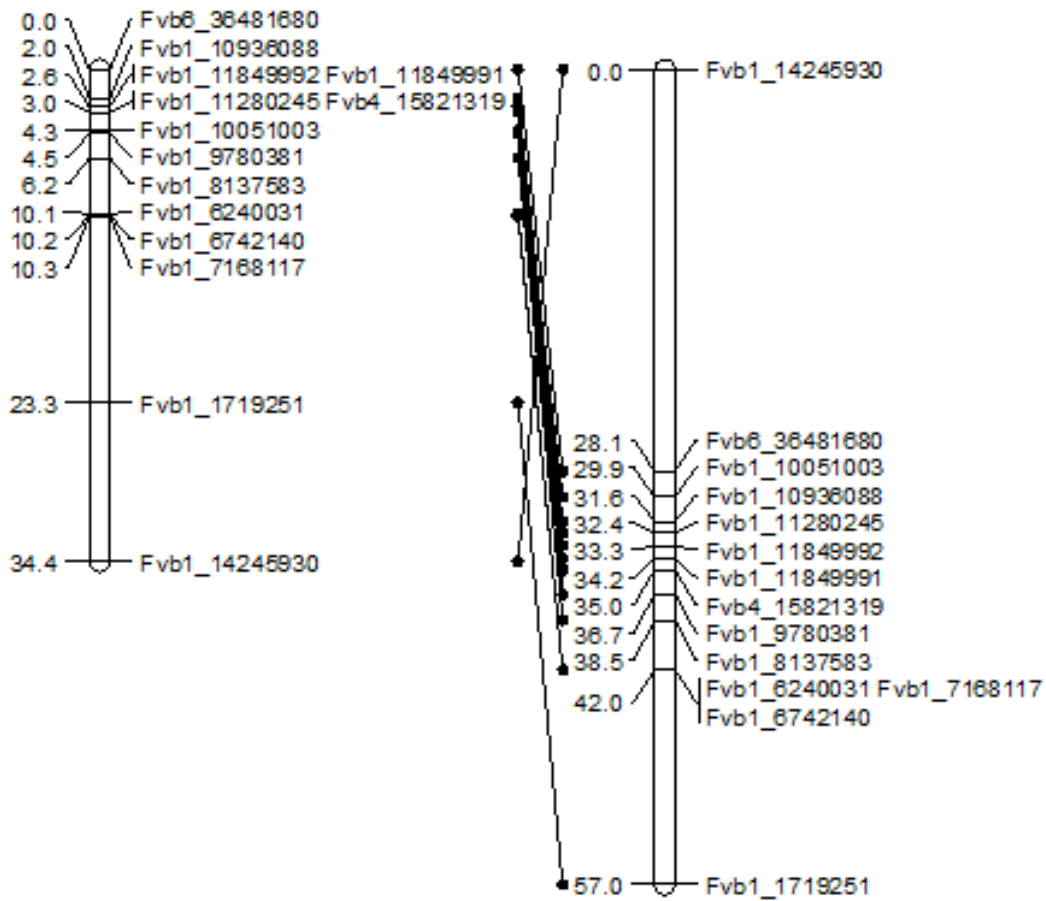

## Honeoye\_21

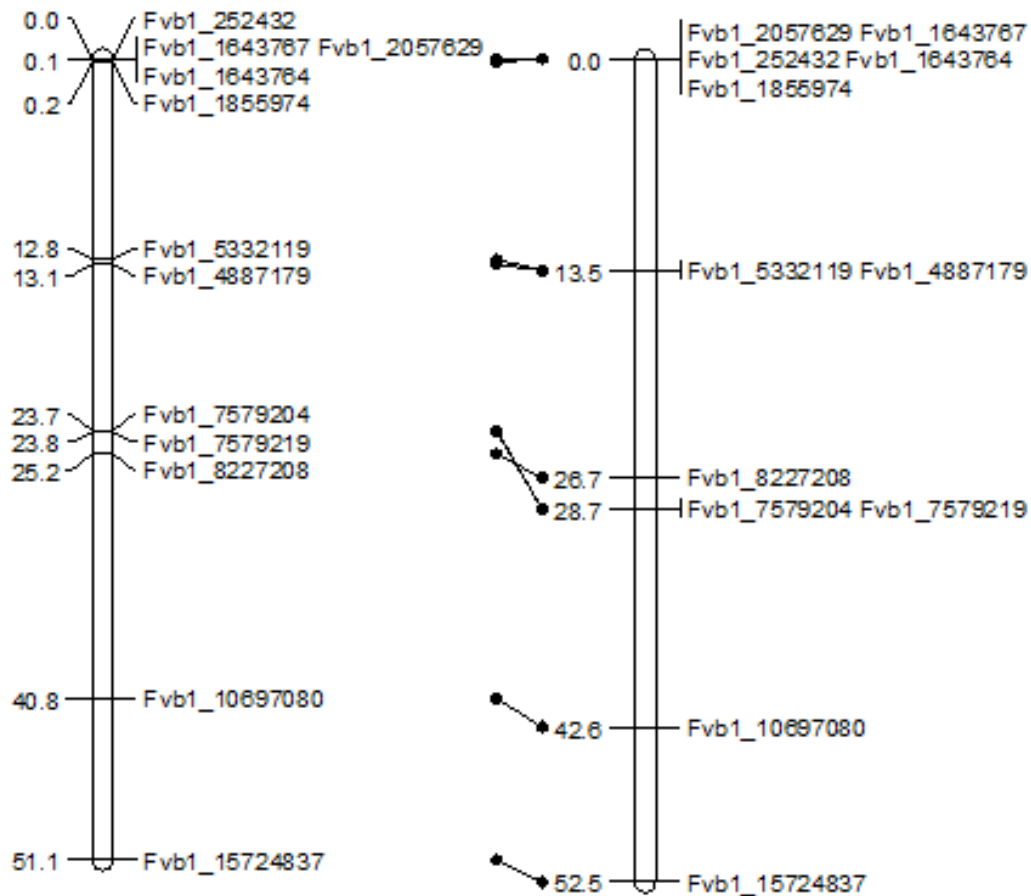

# Fvb 1

## Honeoye\_23

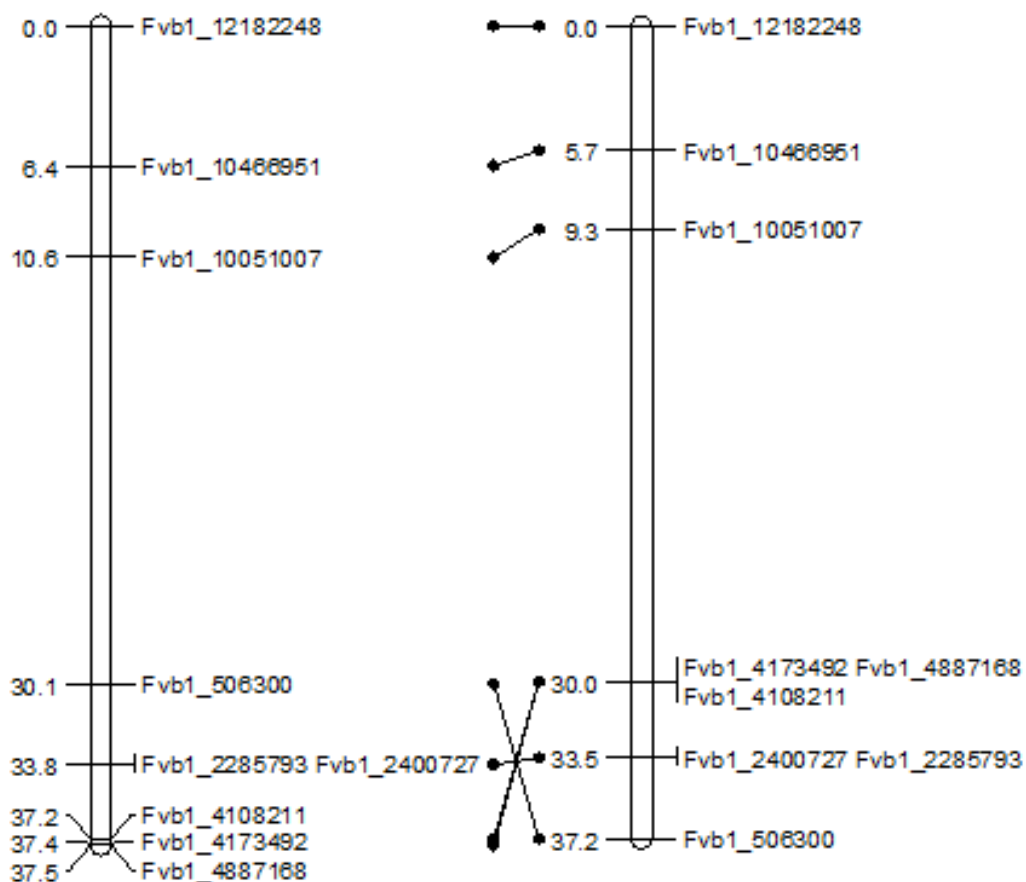

## Honeoye\_27

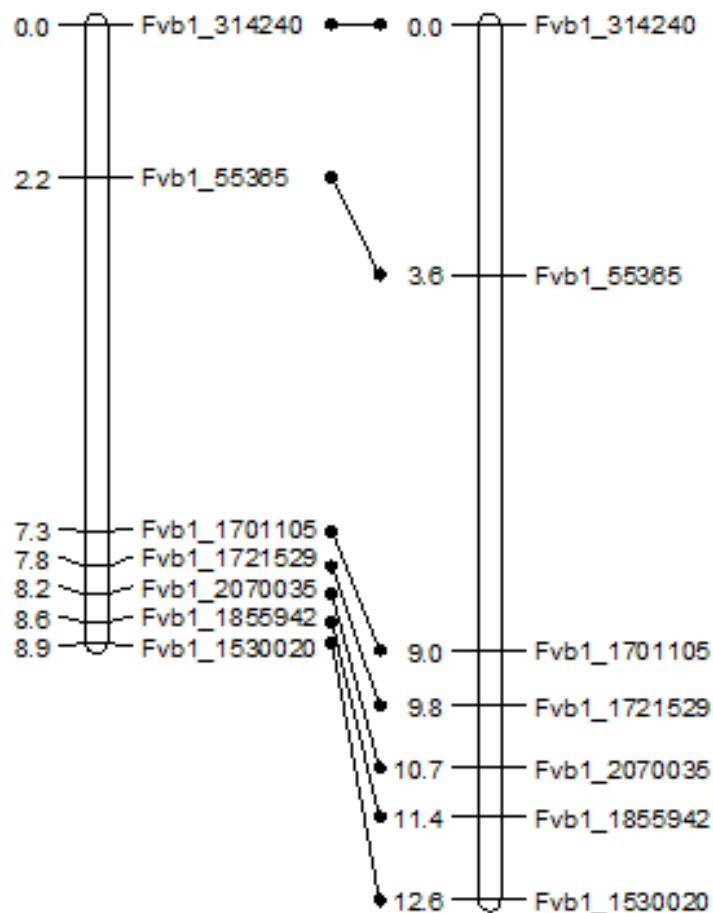

# Fvb 2

## Tribute\_13

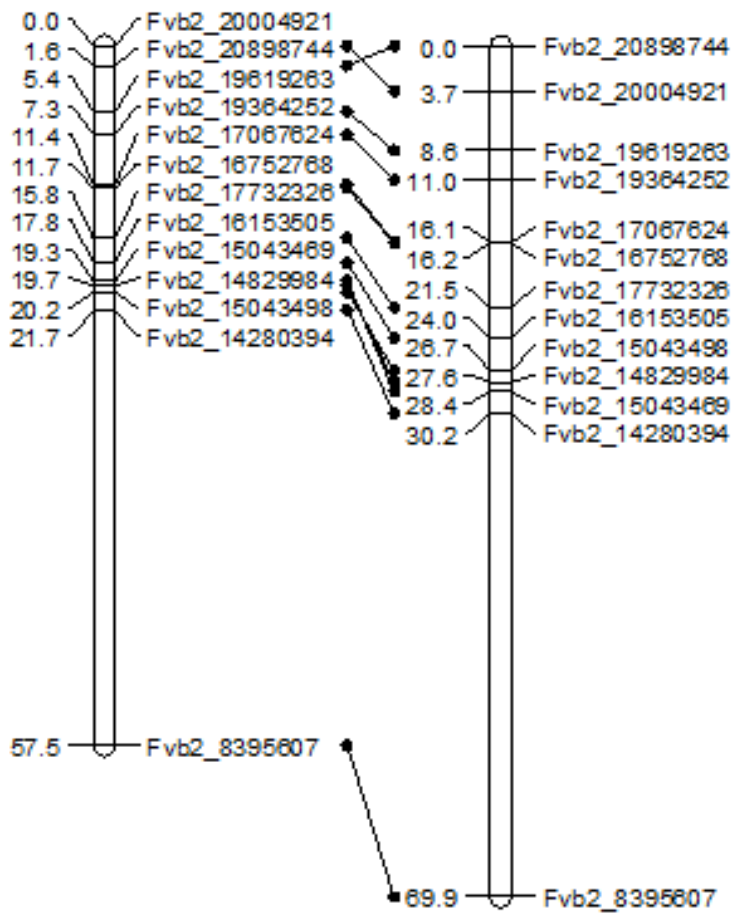

## Tribute\_23

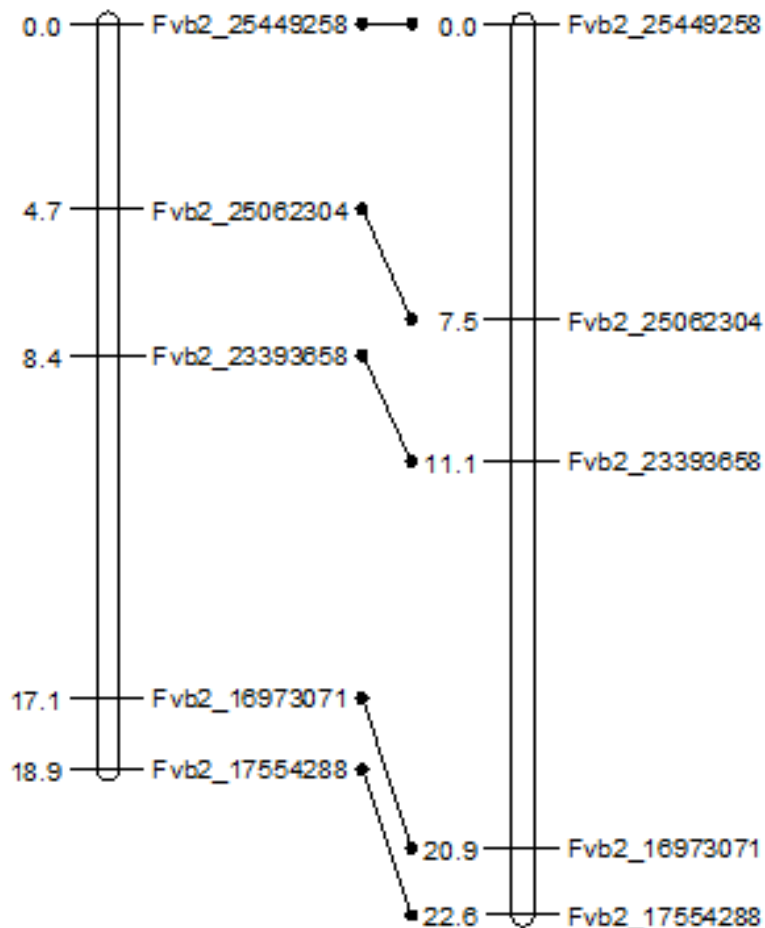

# Fvb 2

## Tribute\_26

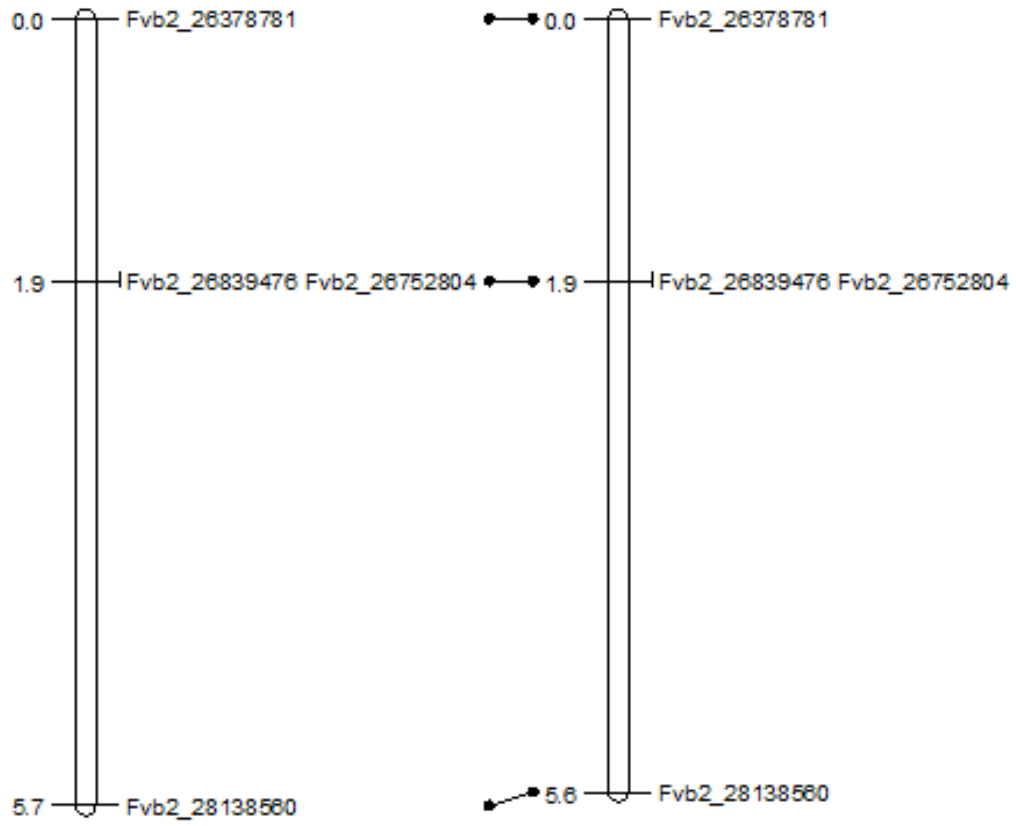

## Tribute\_28

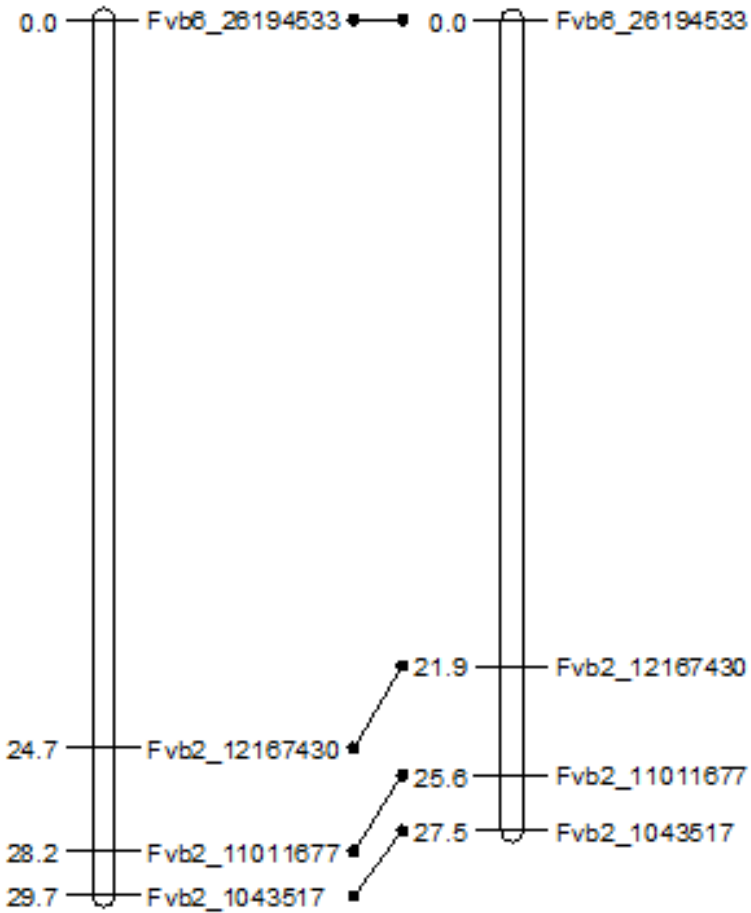

# Fvb 2

## Honeoye\_4

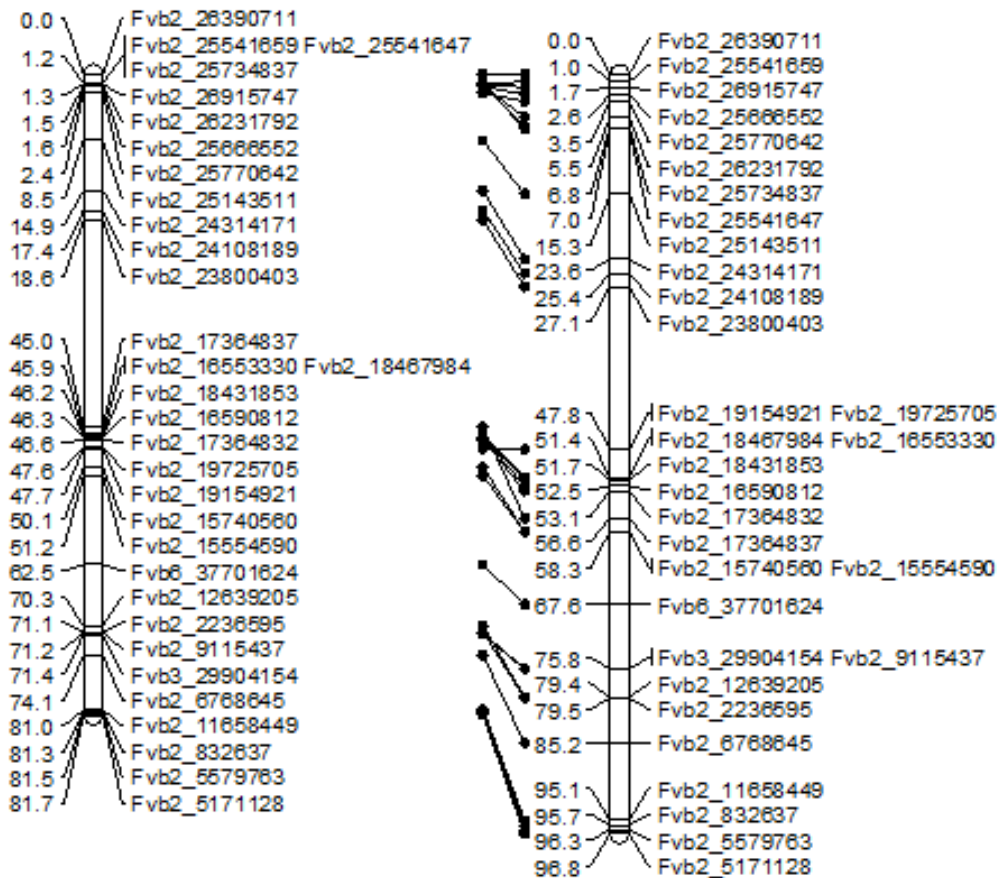

## Honeoye\_7

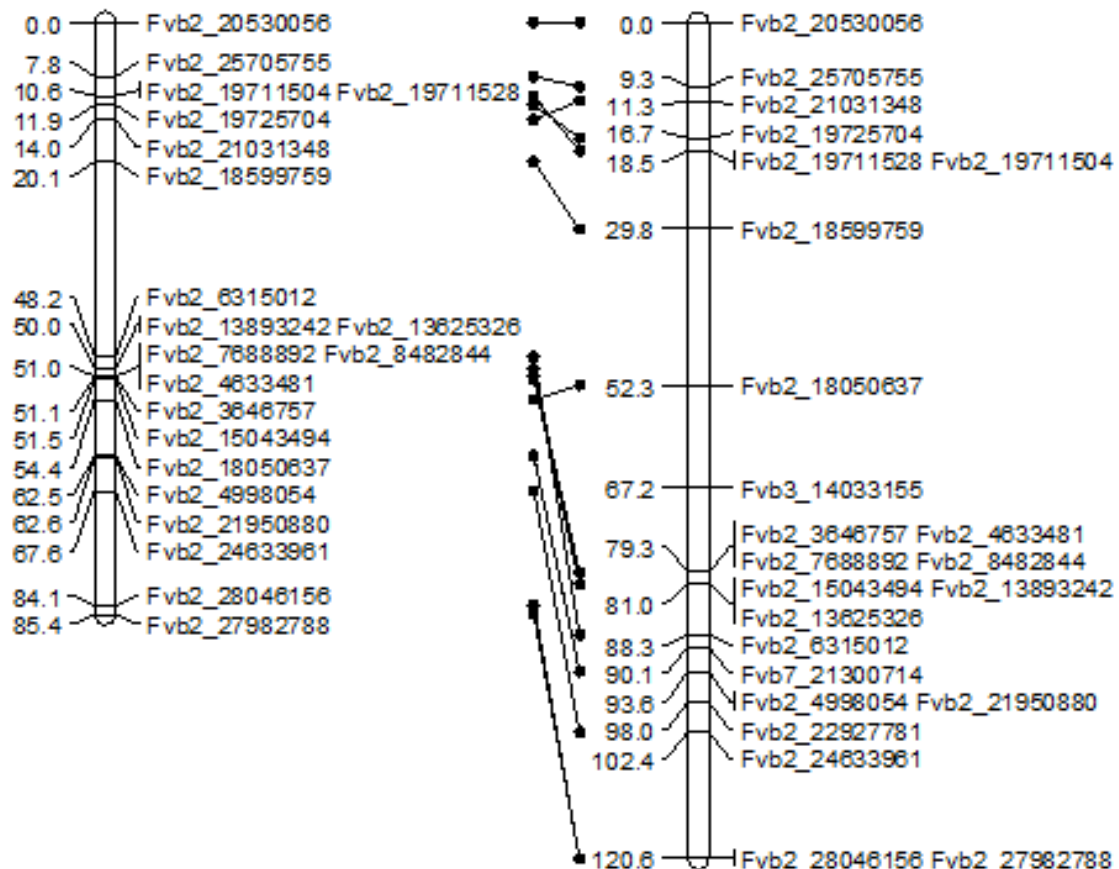

# Fvb 2

## Honeoye\_8

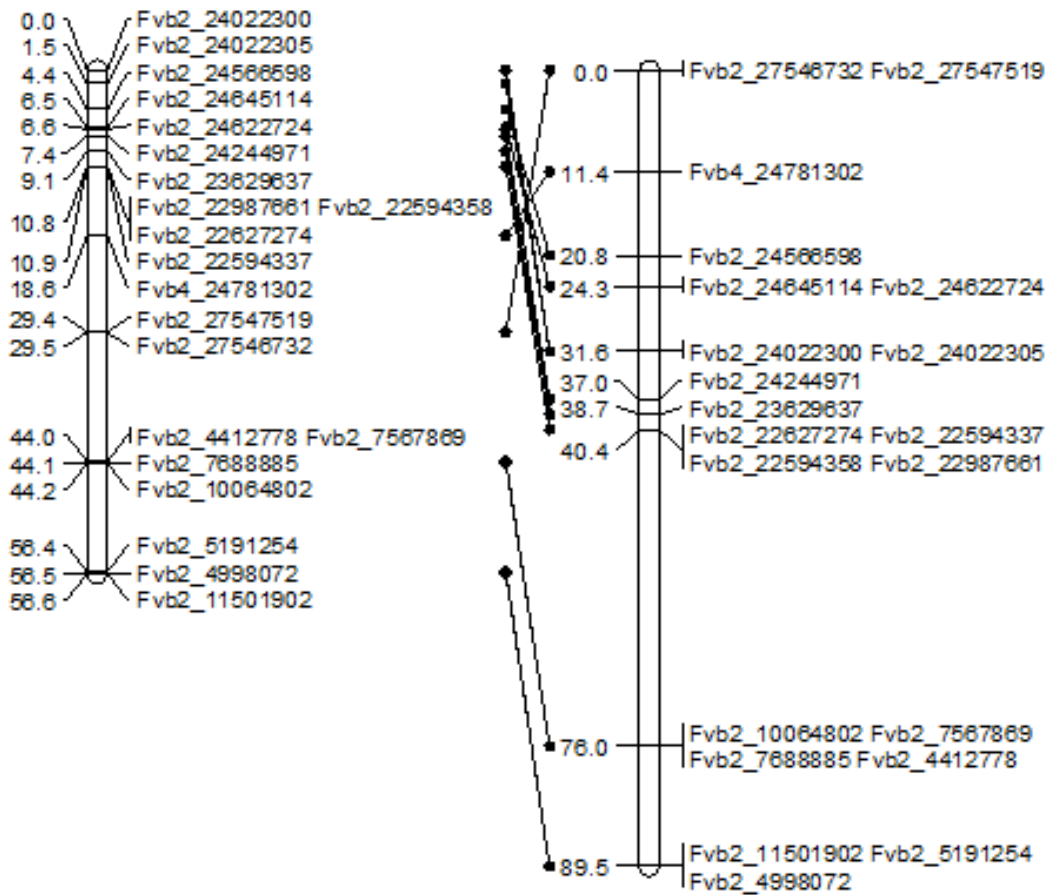

## Honeoye\_32

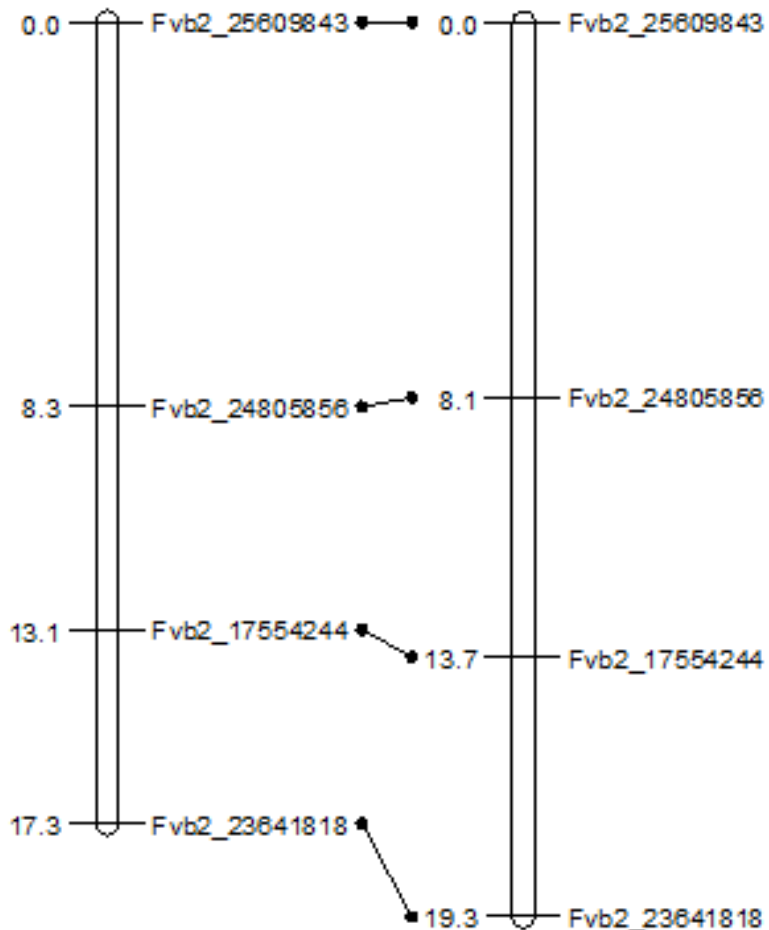



# Fvb 3

## Tribute\_11

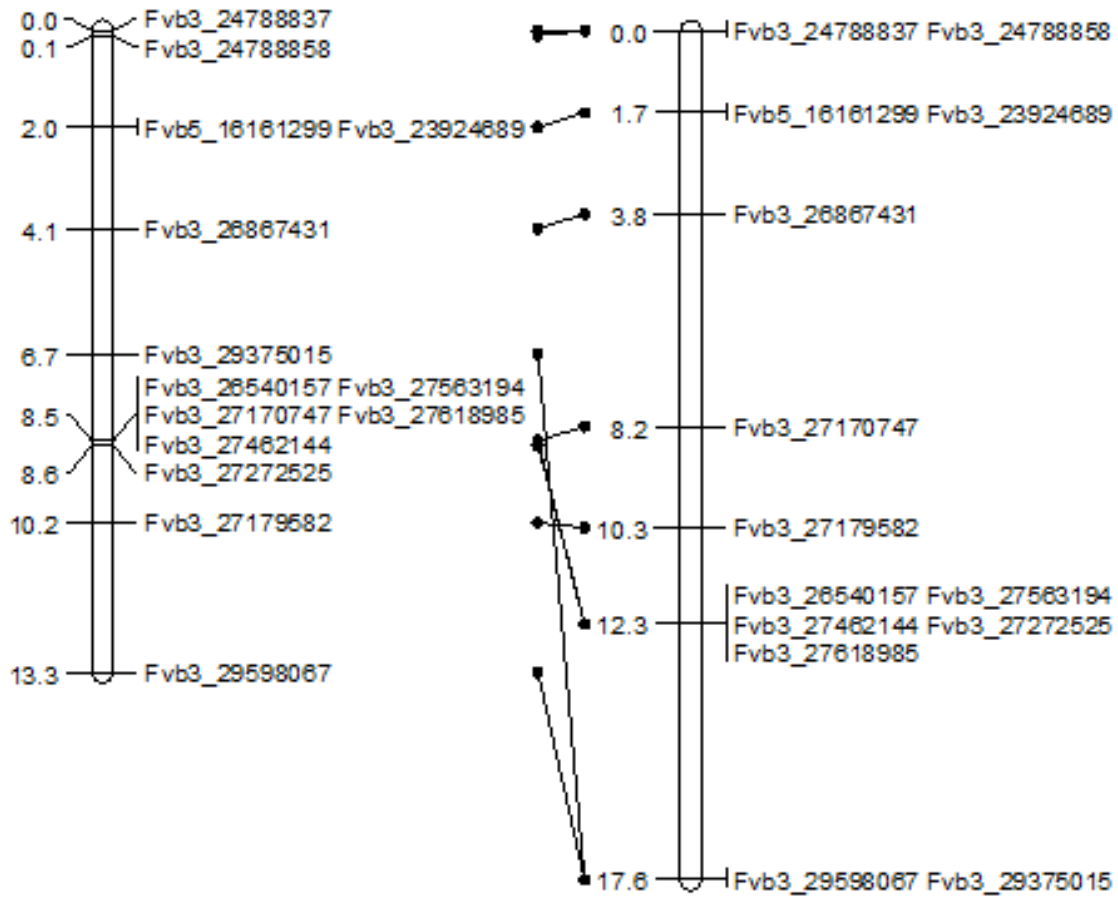

## Tribute\_14

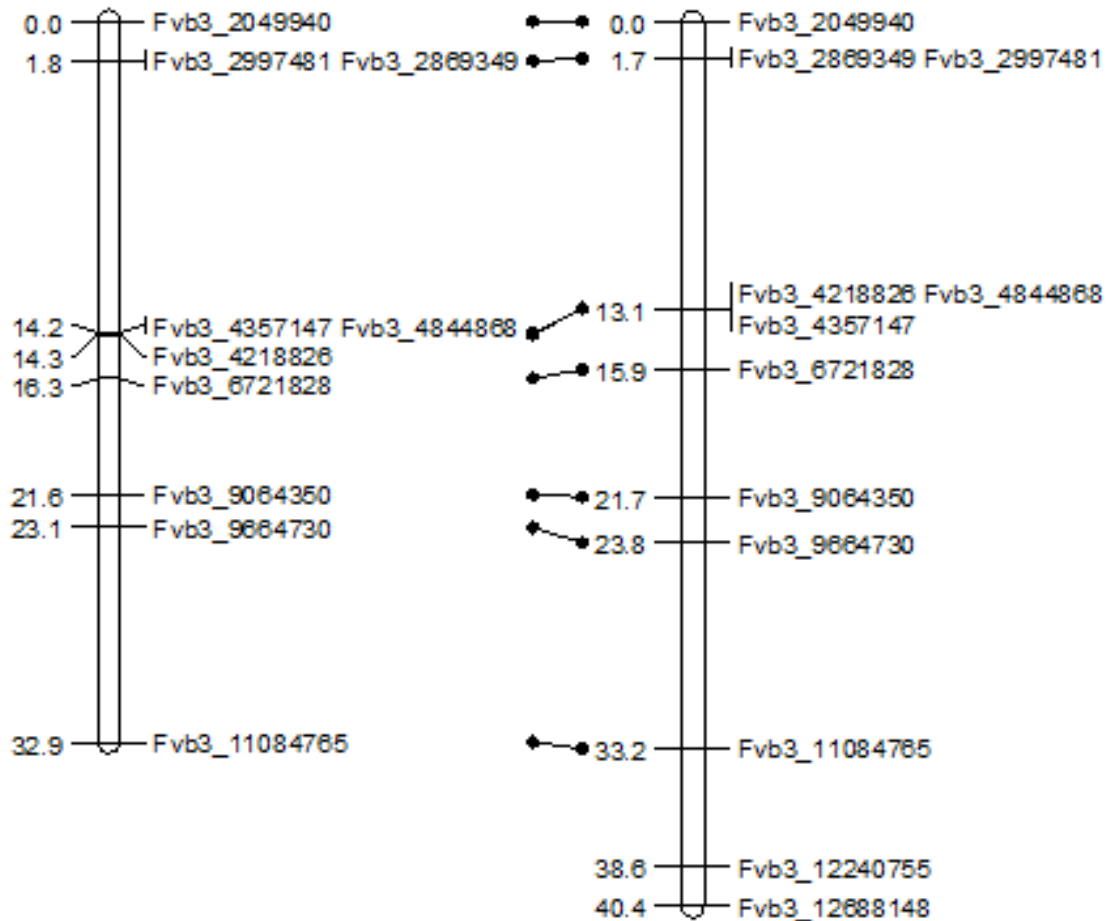

# Fvb 3

## Tribute\_16

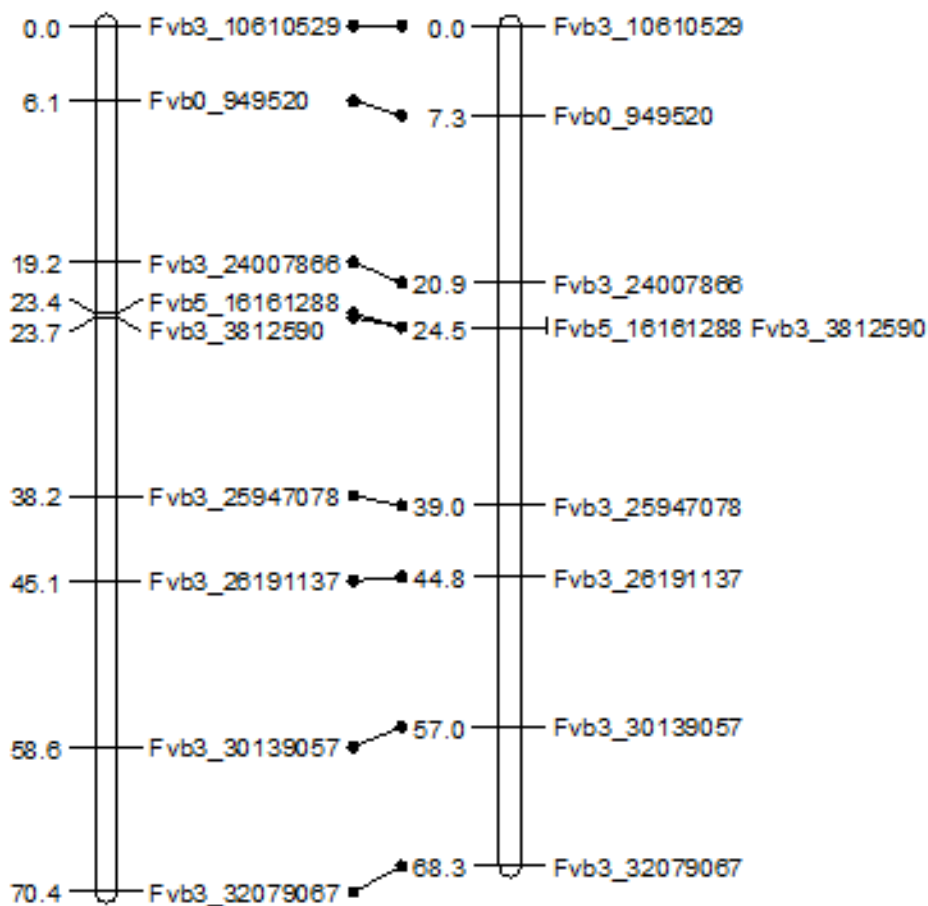

## Tribute\_21

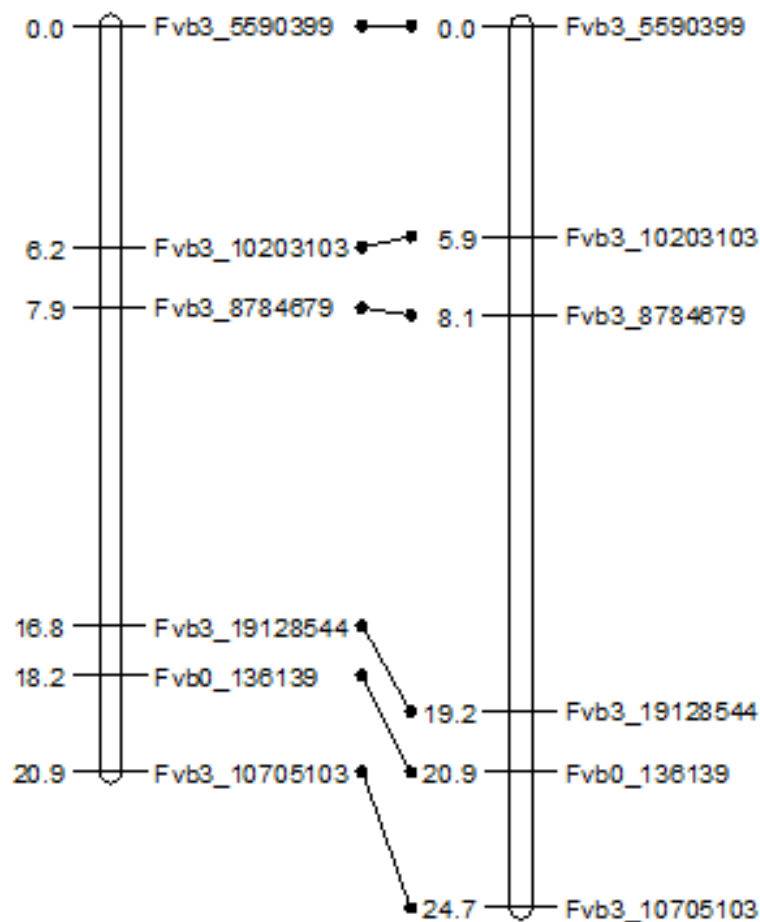

# Fvb 3

## Tribute\_22

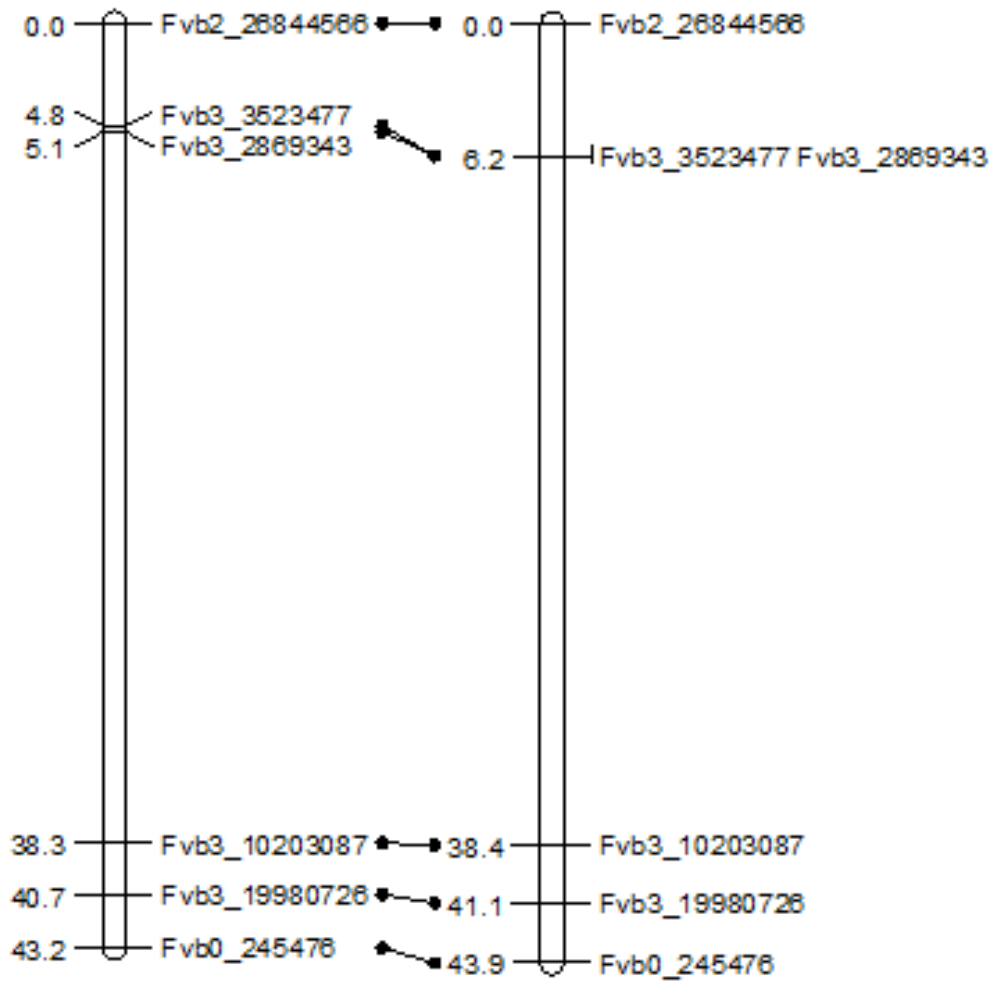

# Fvb 3

## Honeoye\_2

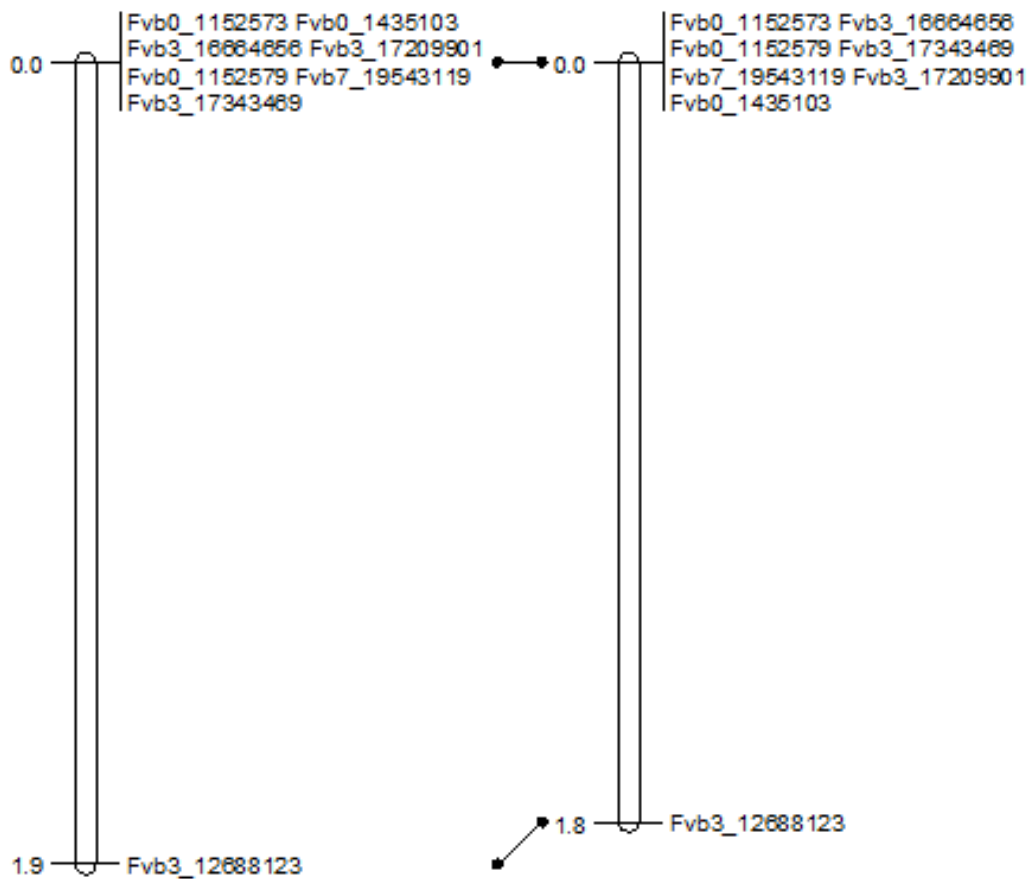

## Honeoye\_3

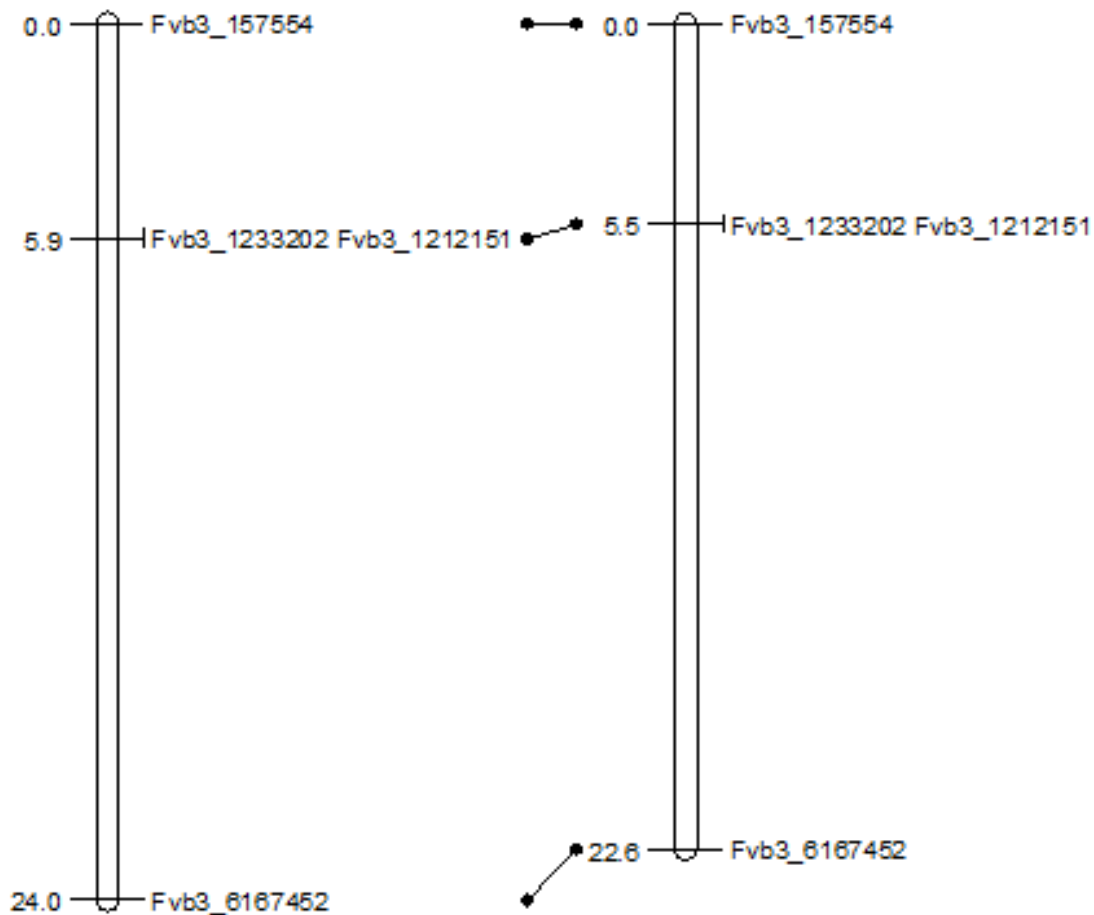

# Fvb 3

## Honeoye\_6

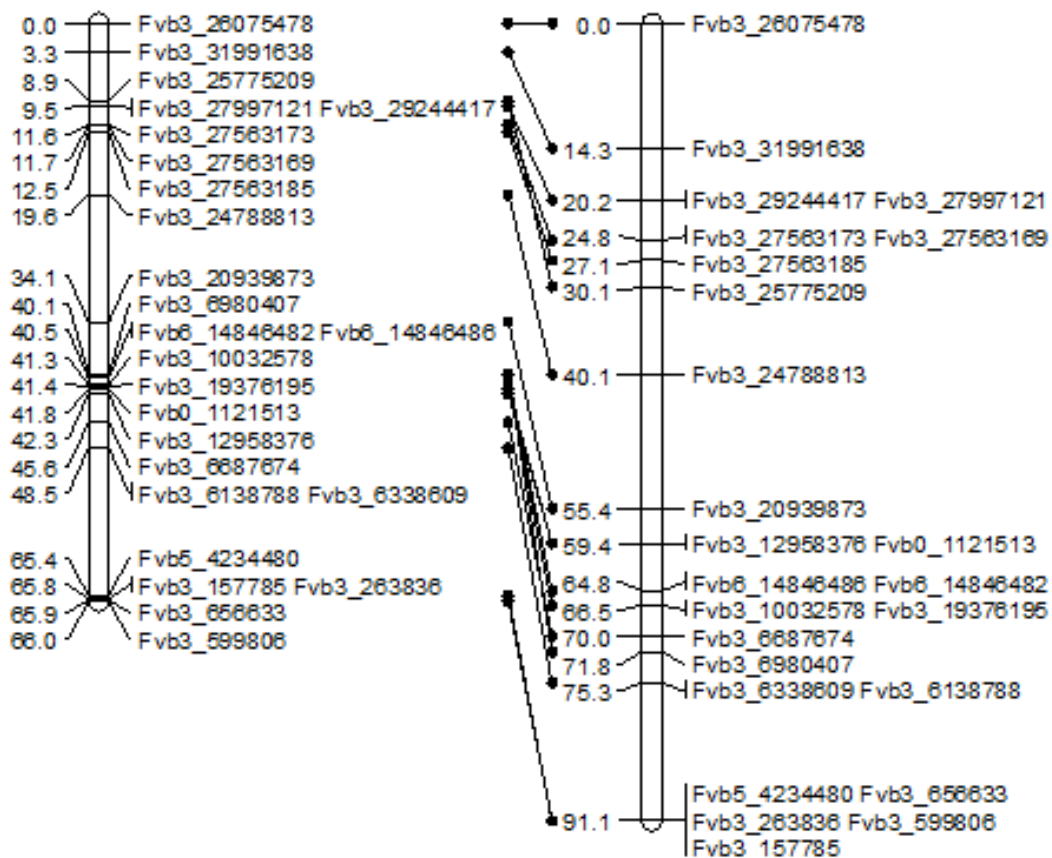

## Honeoye\_10

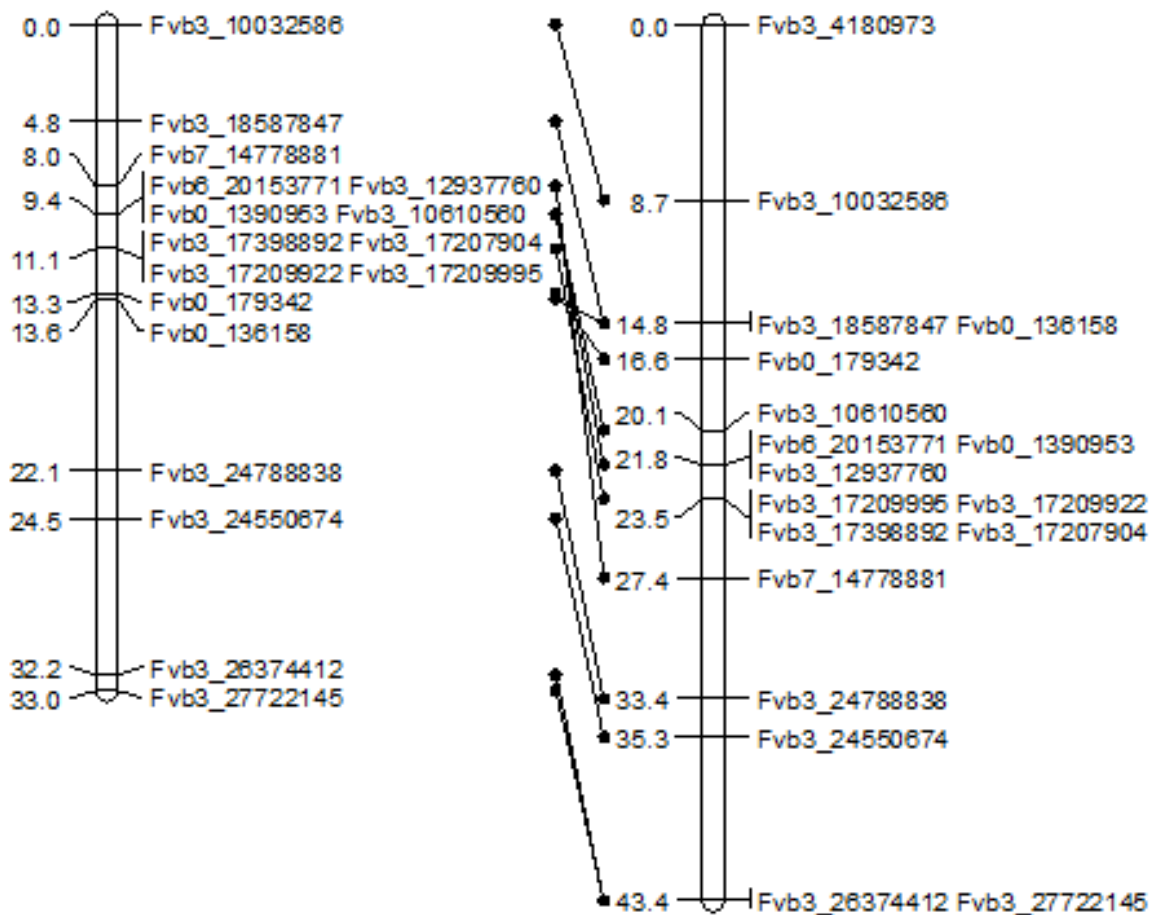

# Fvb 4

## Tribute\_2

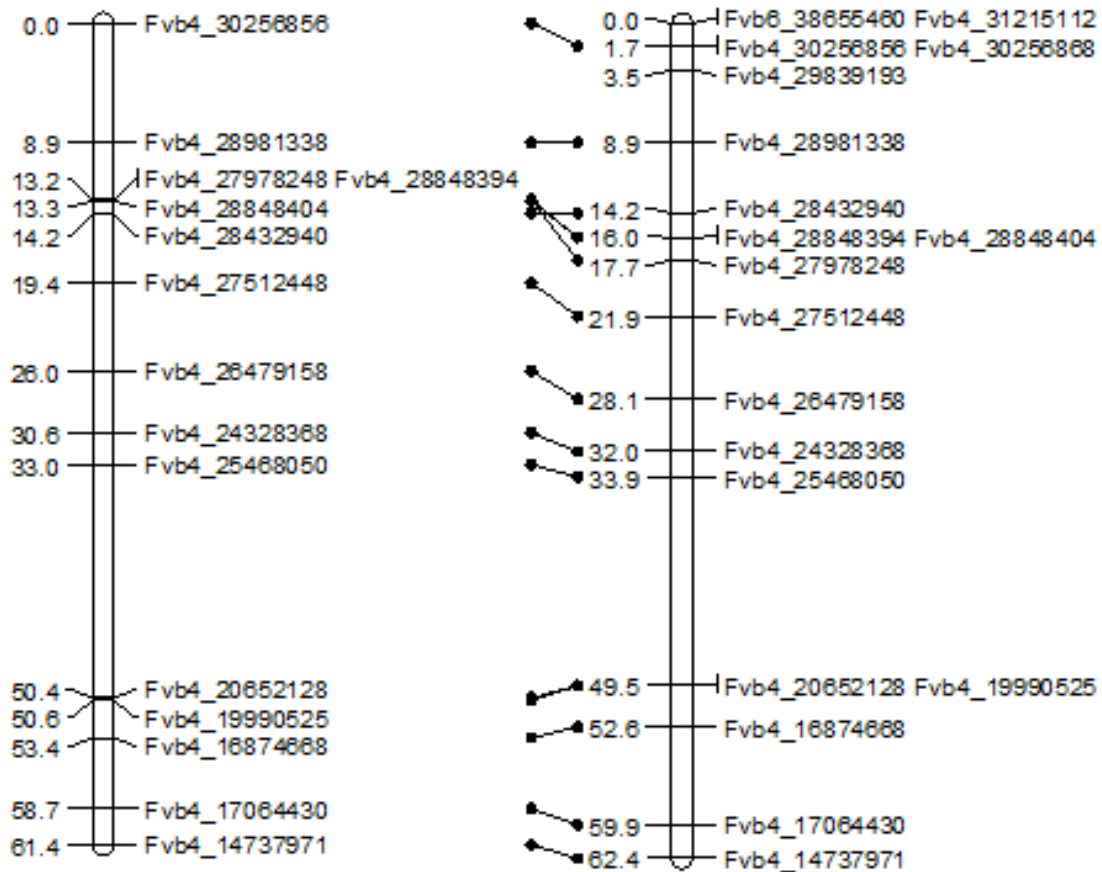

## Tribute\_7

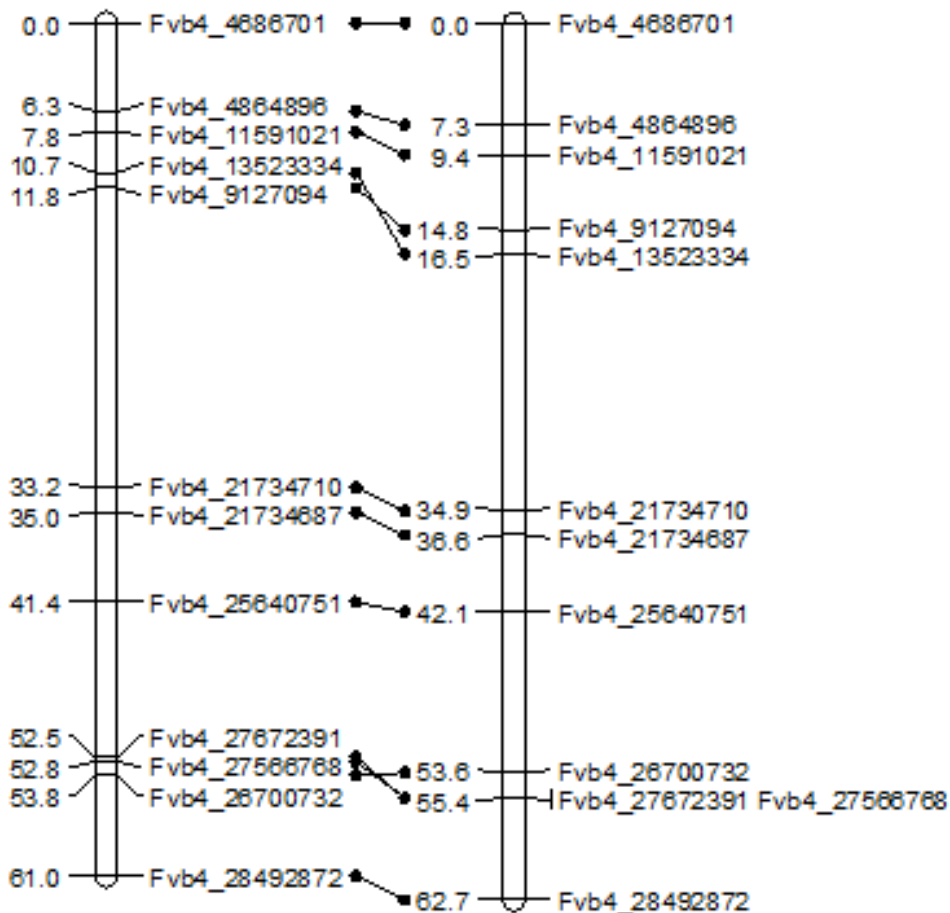

# Fvb 4

## Tribute\_10

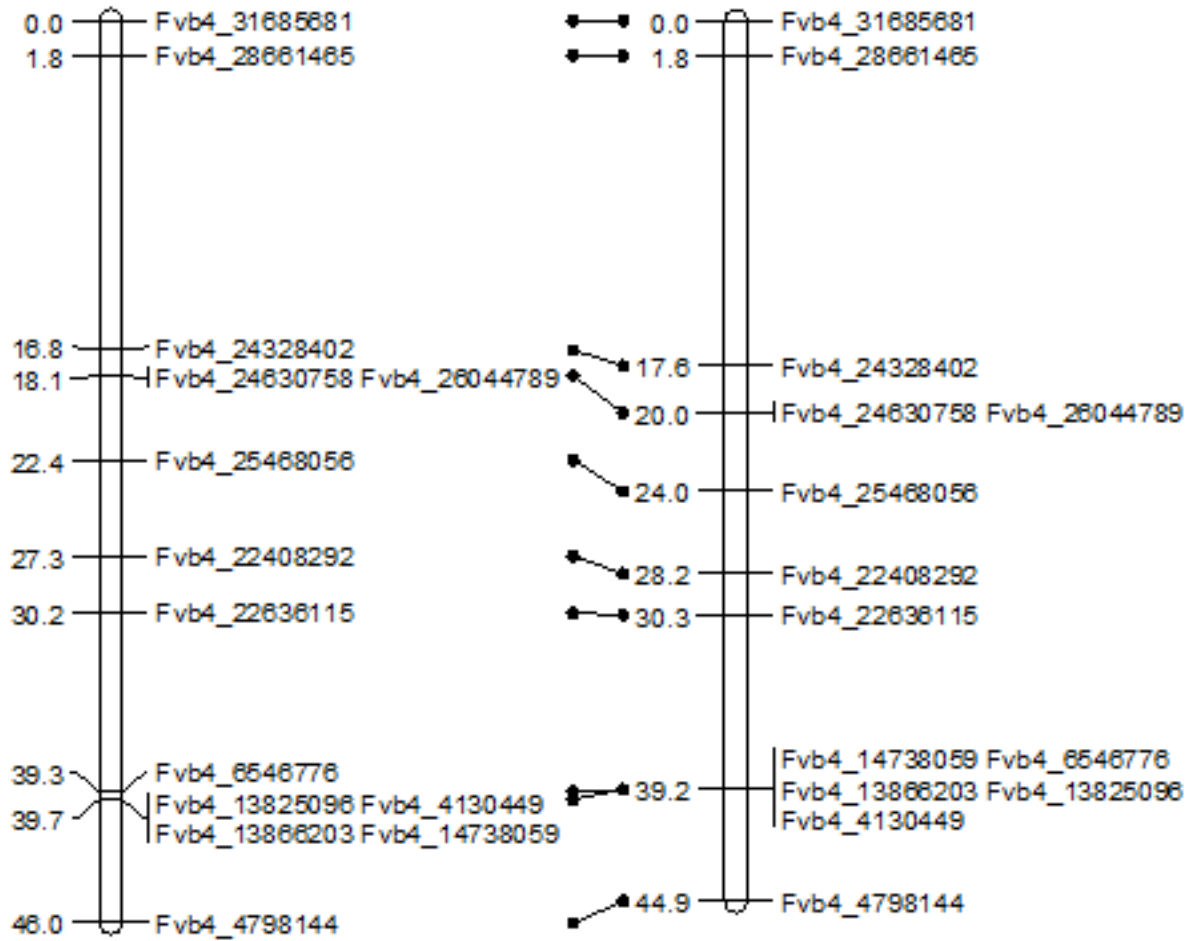

# Fvb 4

## Honeoye\_12

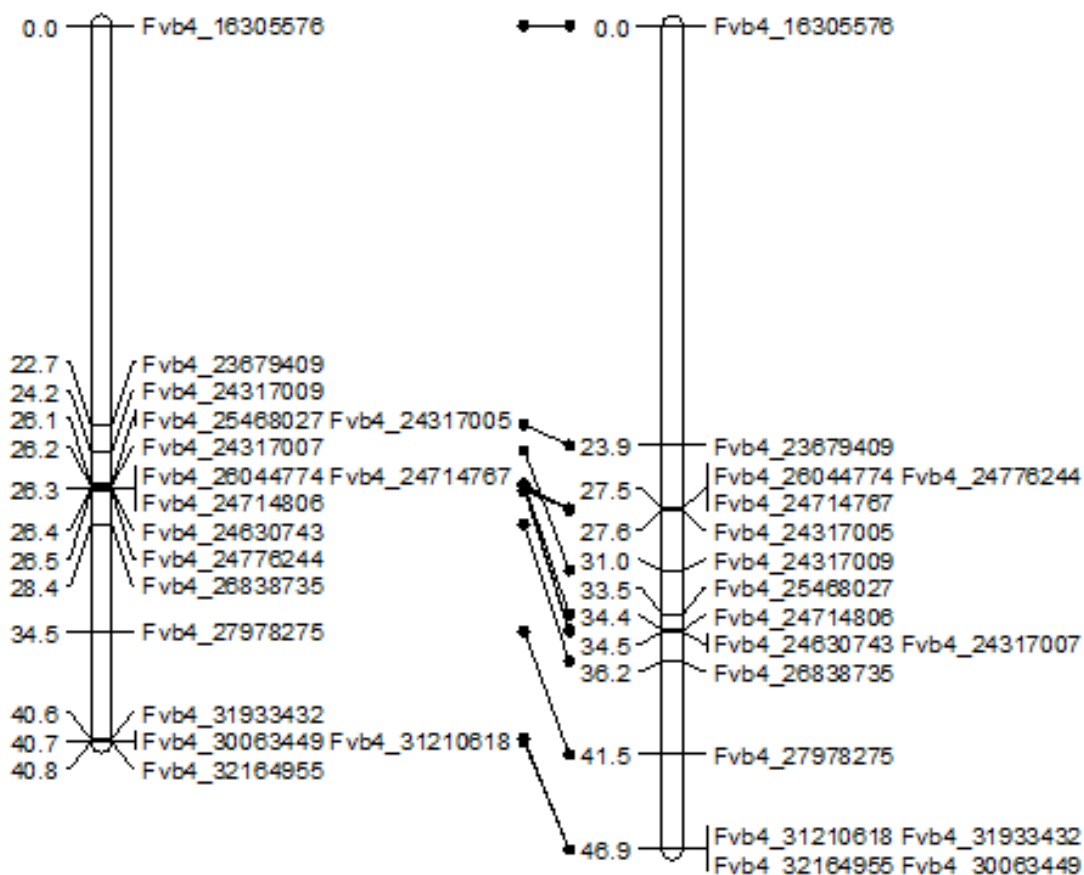

## Honeoye\_19

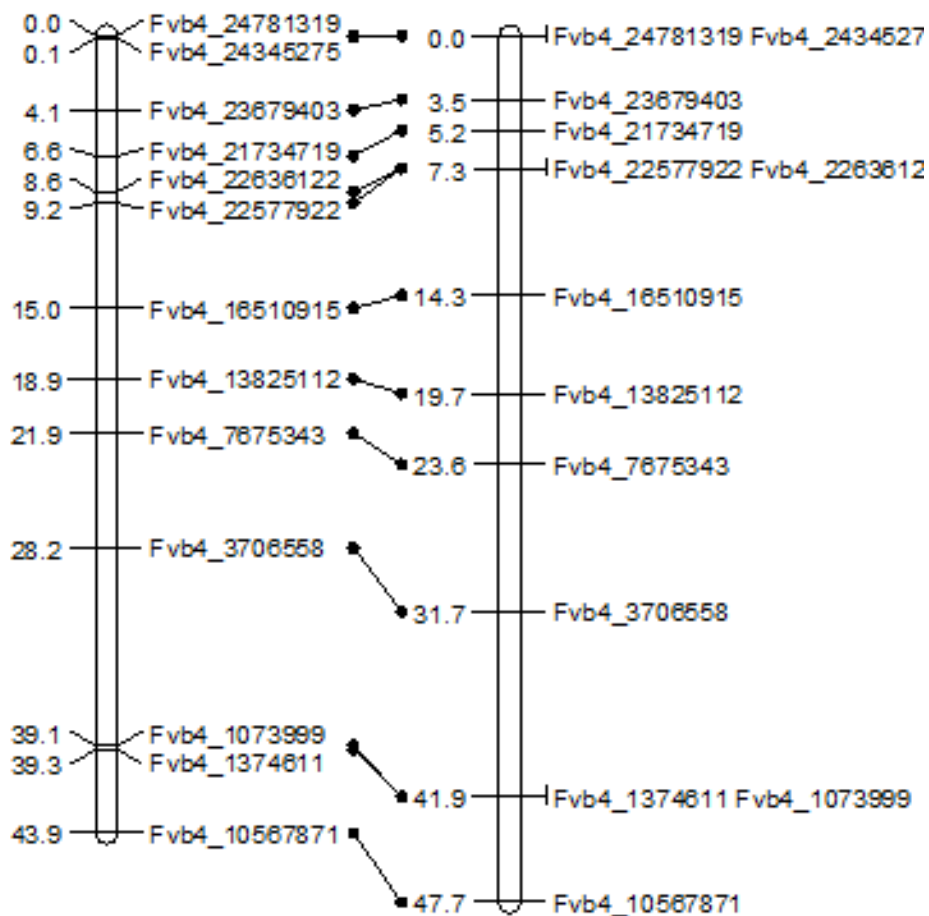



# Fvb 4

## Honeoye\_28

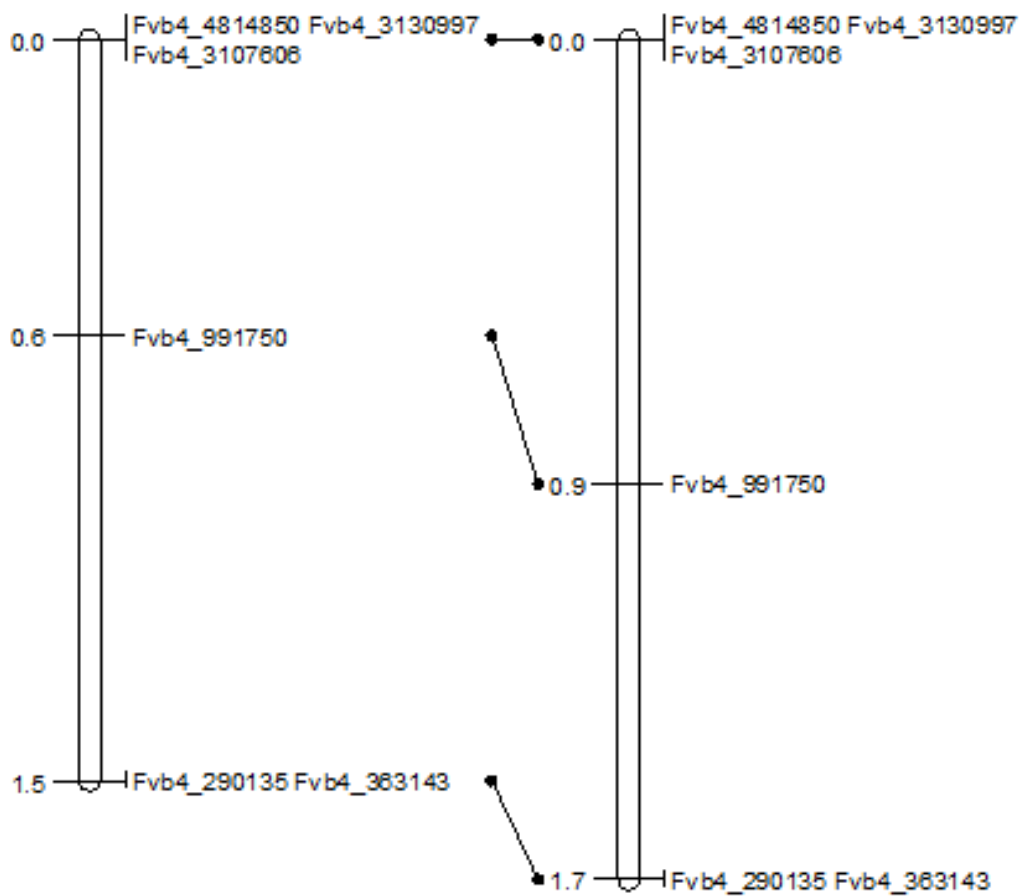

## Honeoye\_30

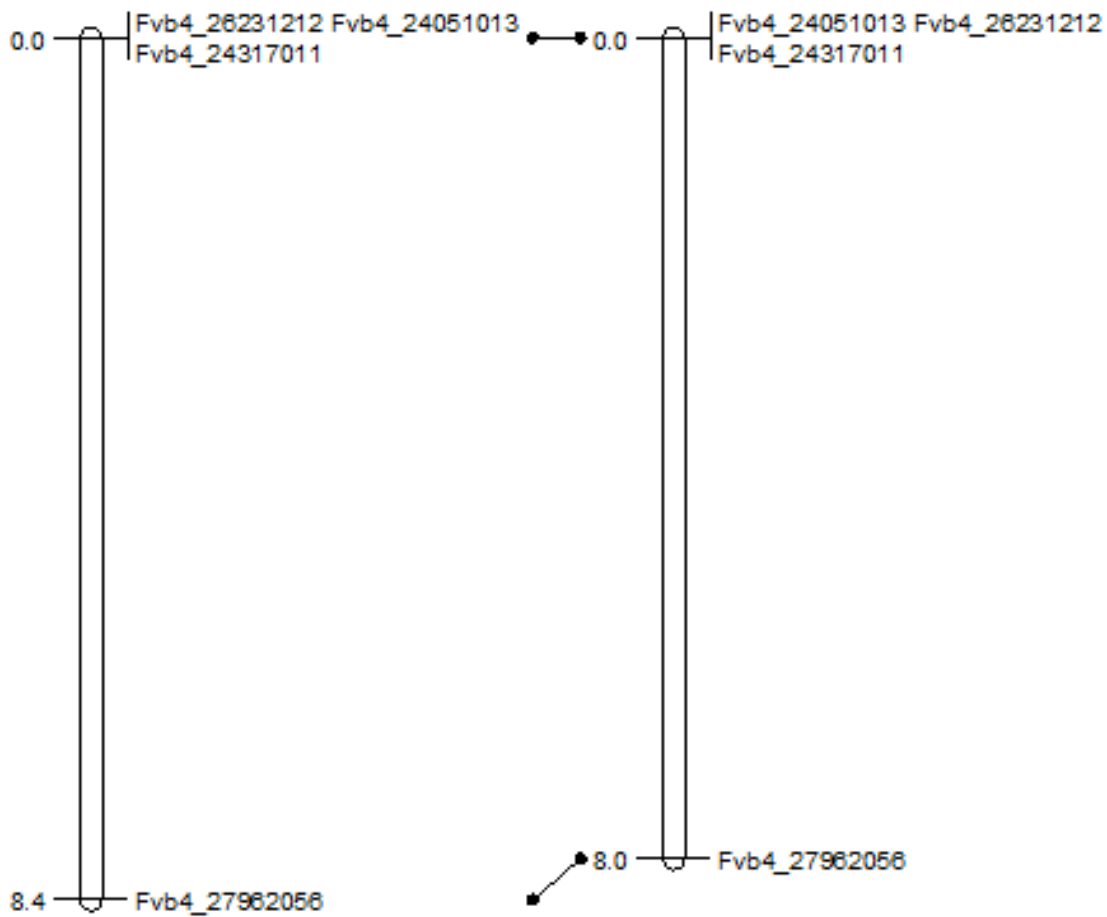

# Fvb 5

## Tribute\_4

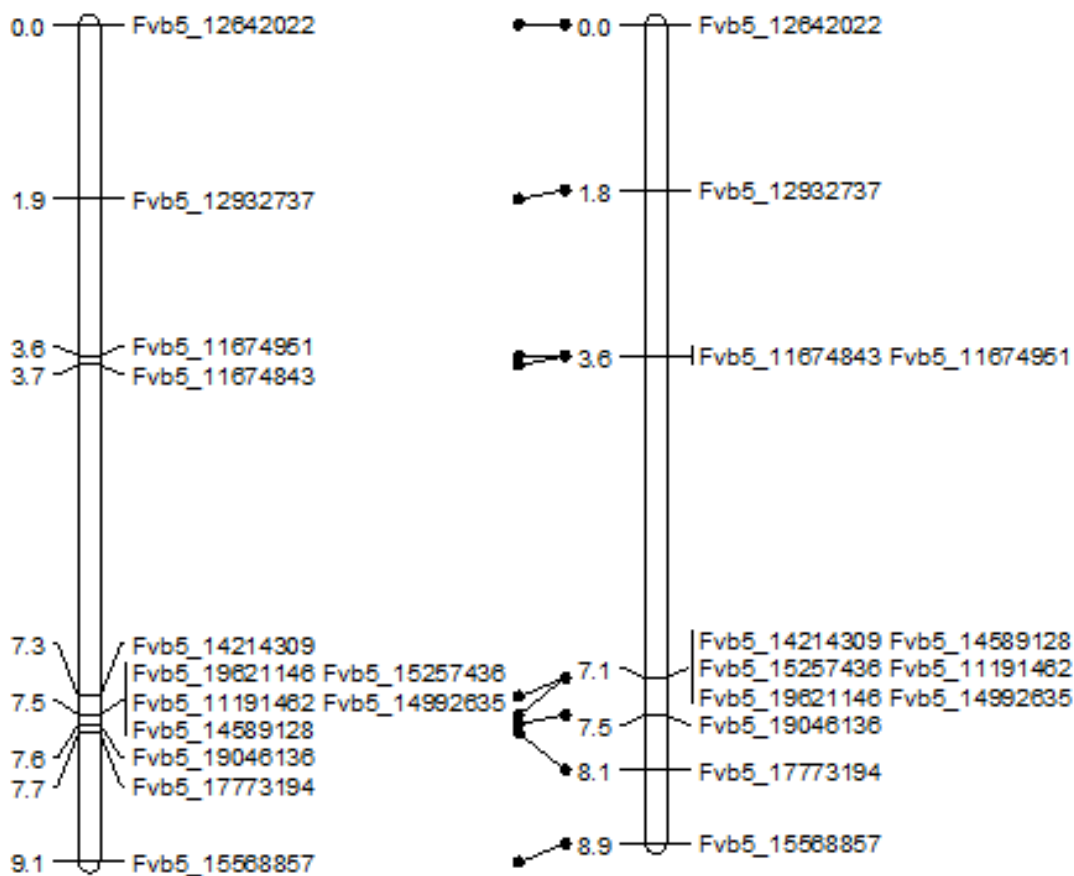

## Tribute\_5

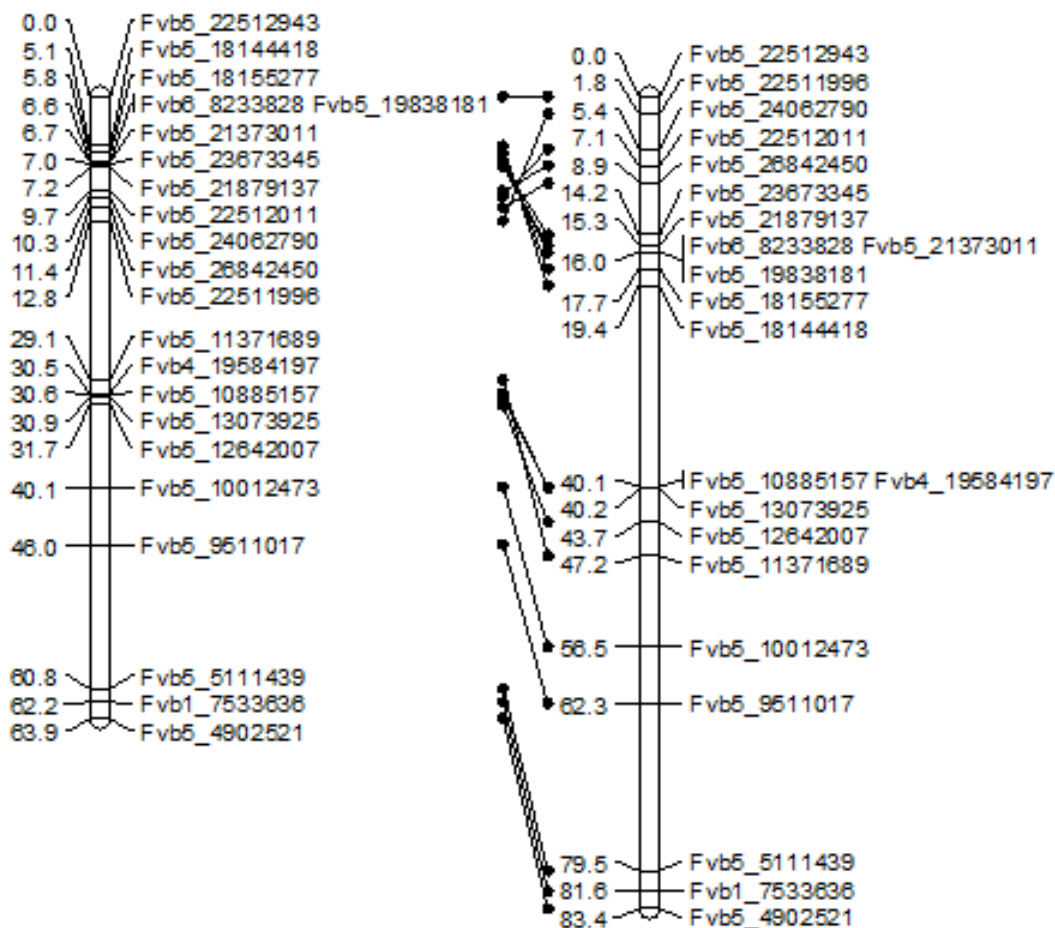

# Fvb 5

## Tribute\_15

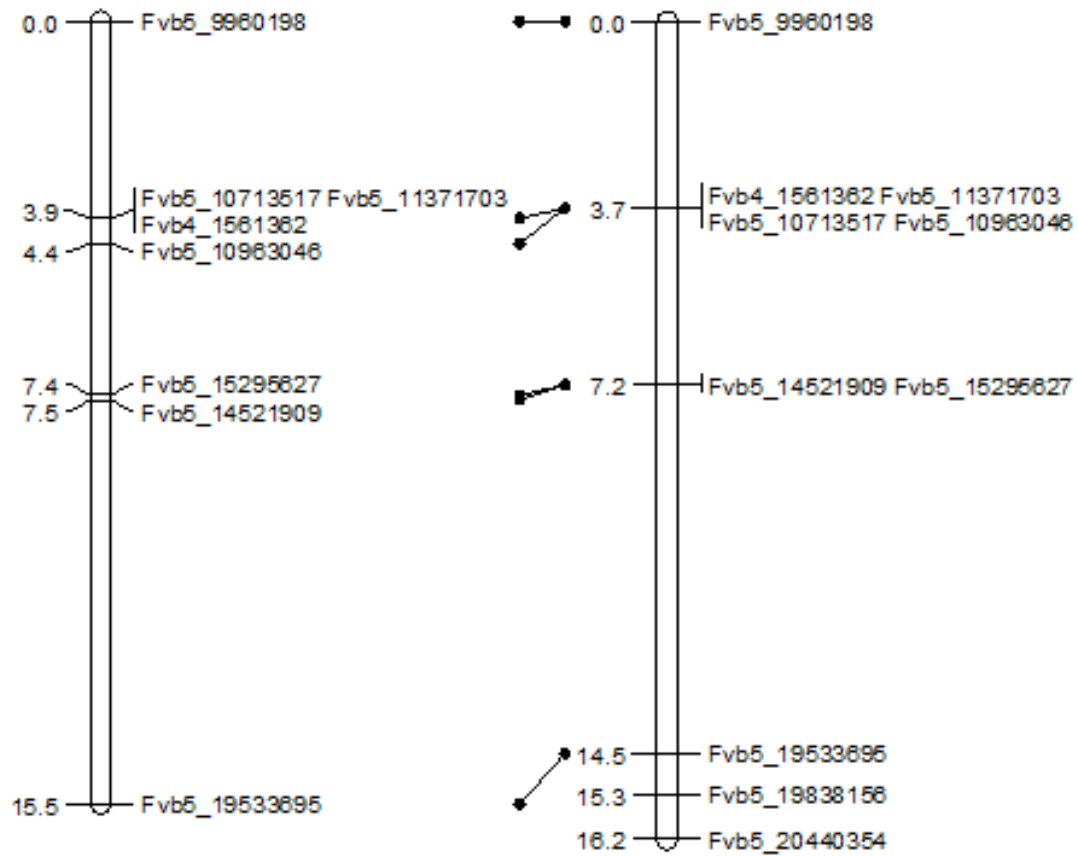

# Fvb 5

## Honeoye\_14

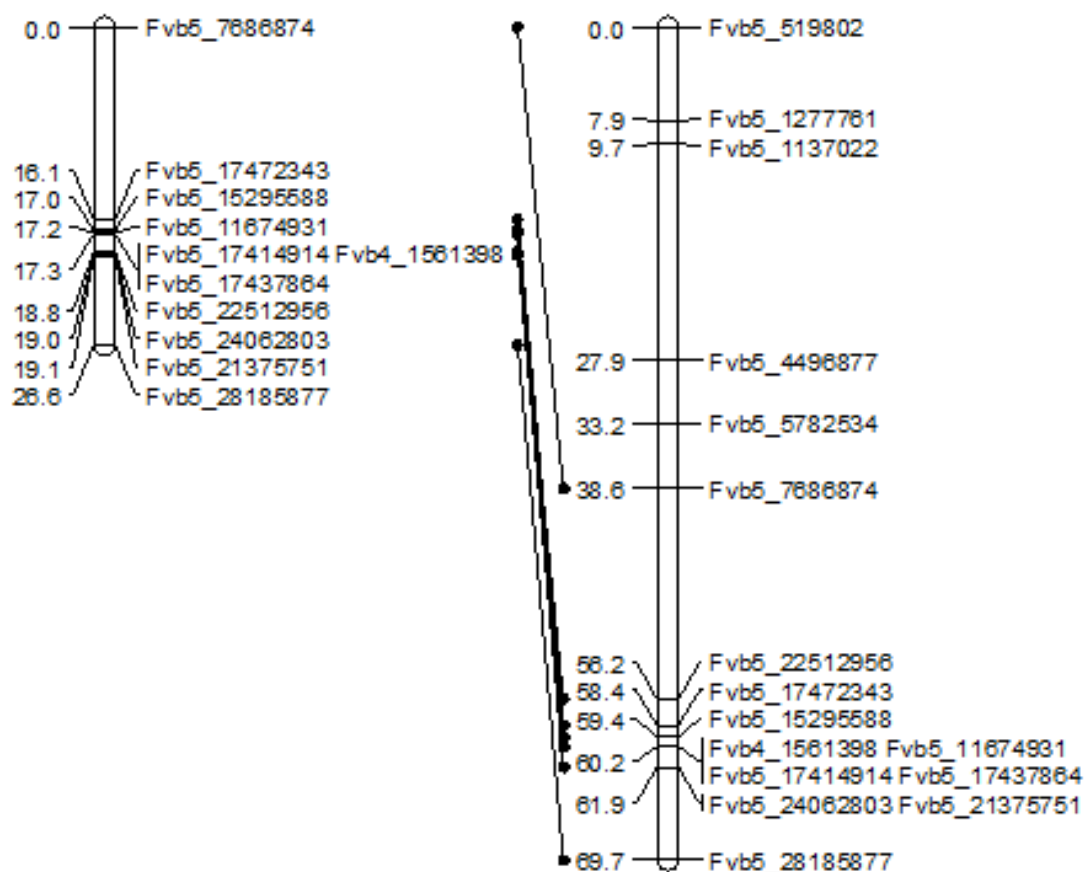

## Honeoye\_17

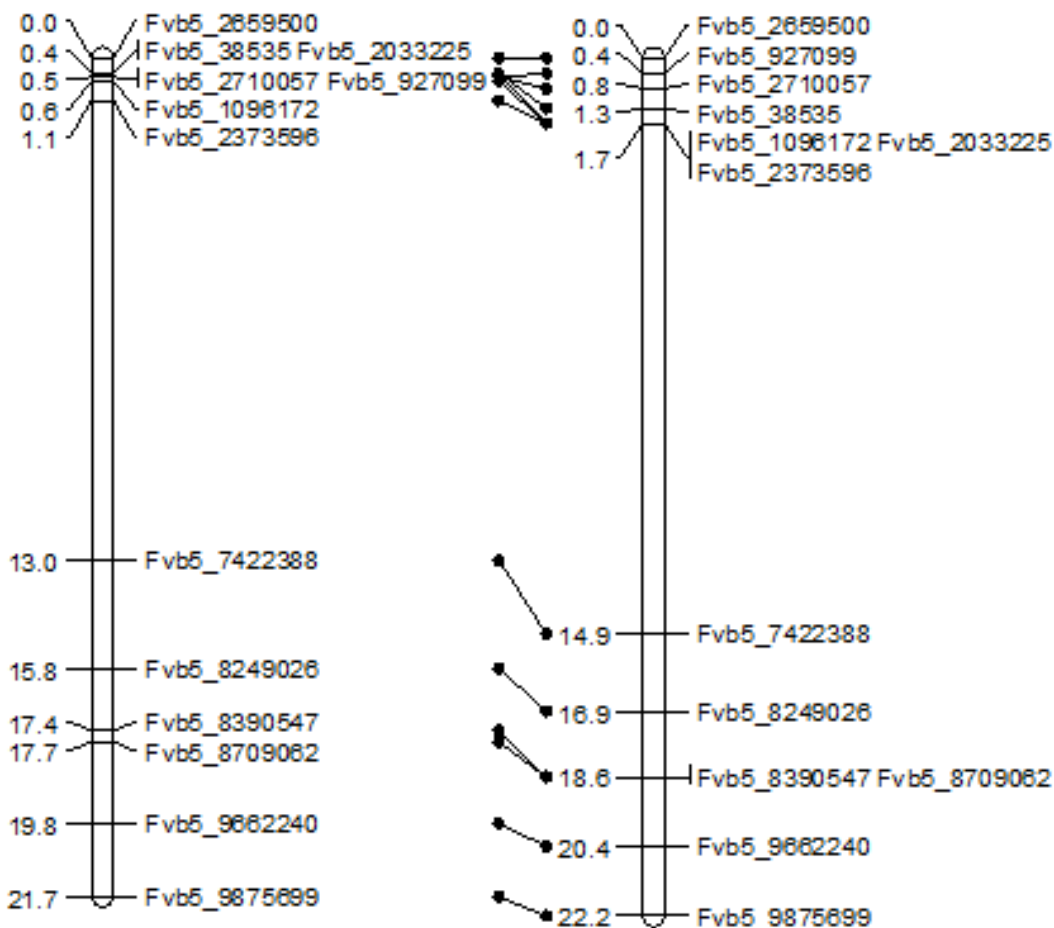

# Fvb 5

## Honeoye\_22

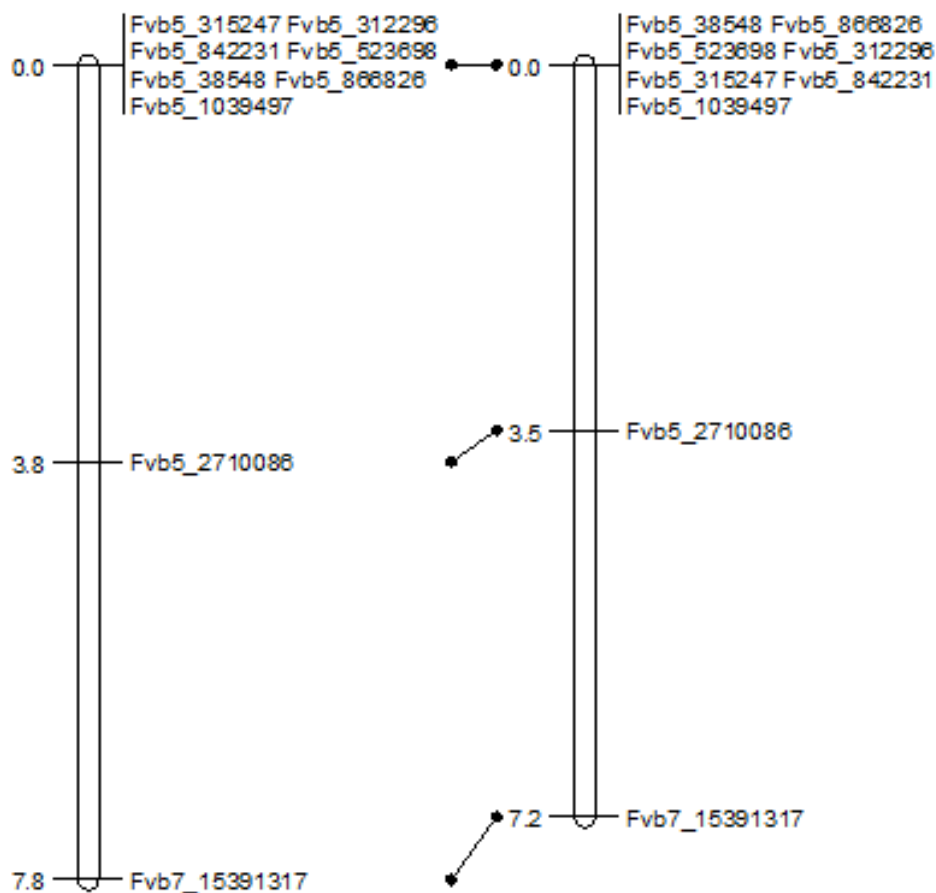

## Honeoye\_25

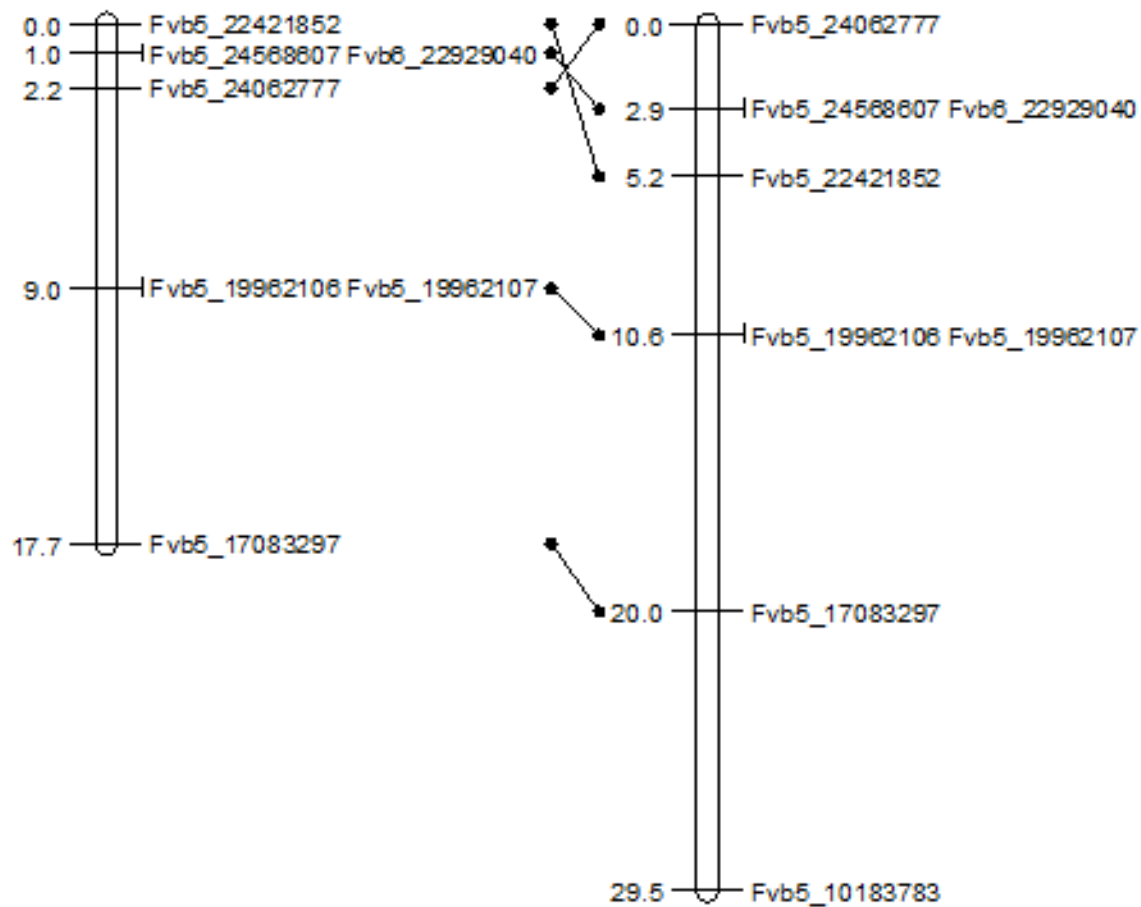

# Fvb 6

## Tribute\_1

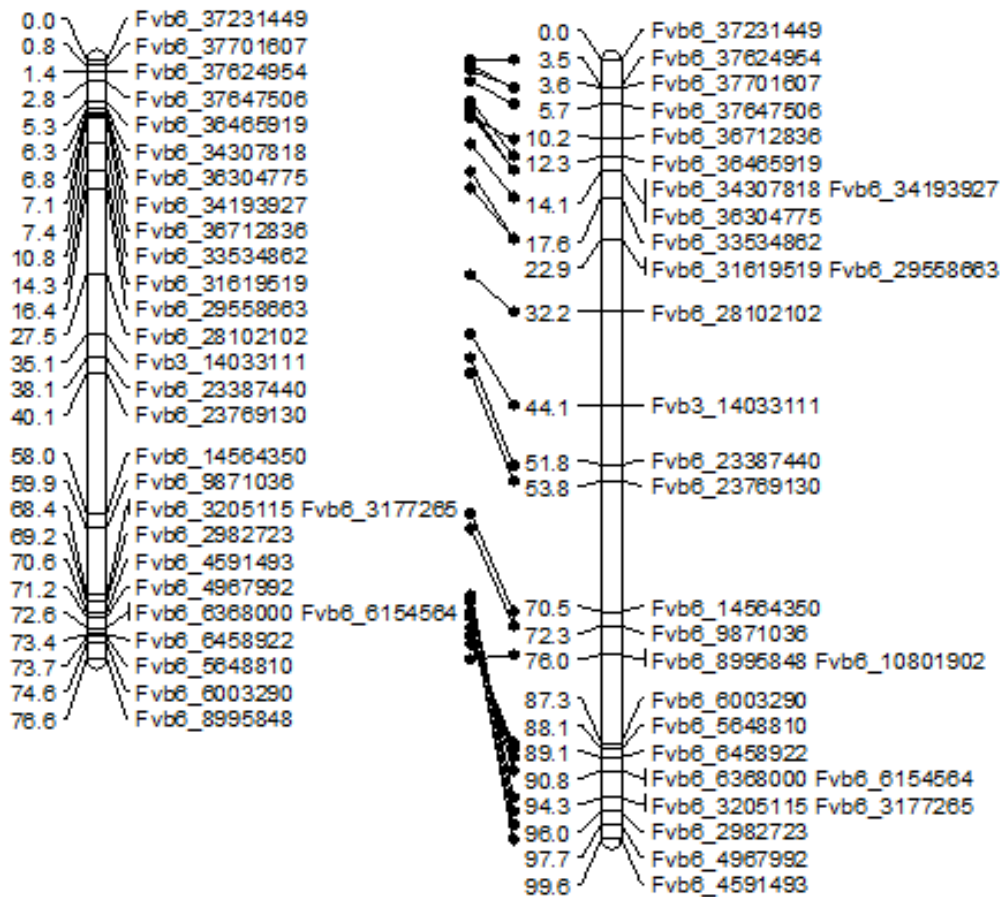

## Tribute\_3

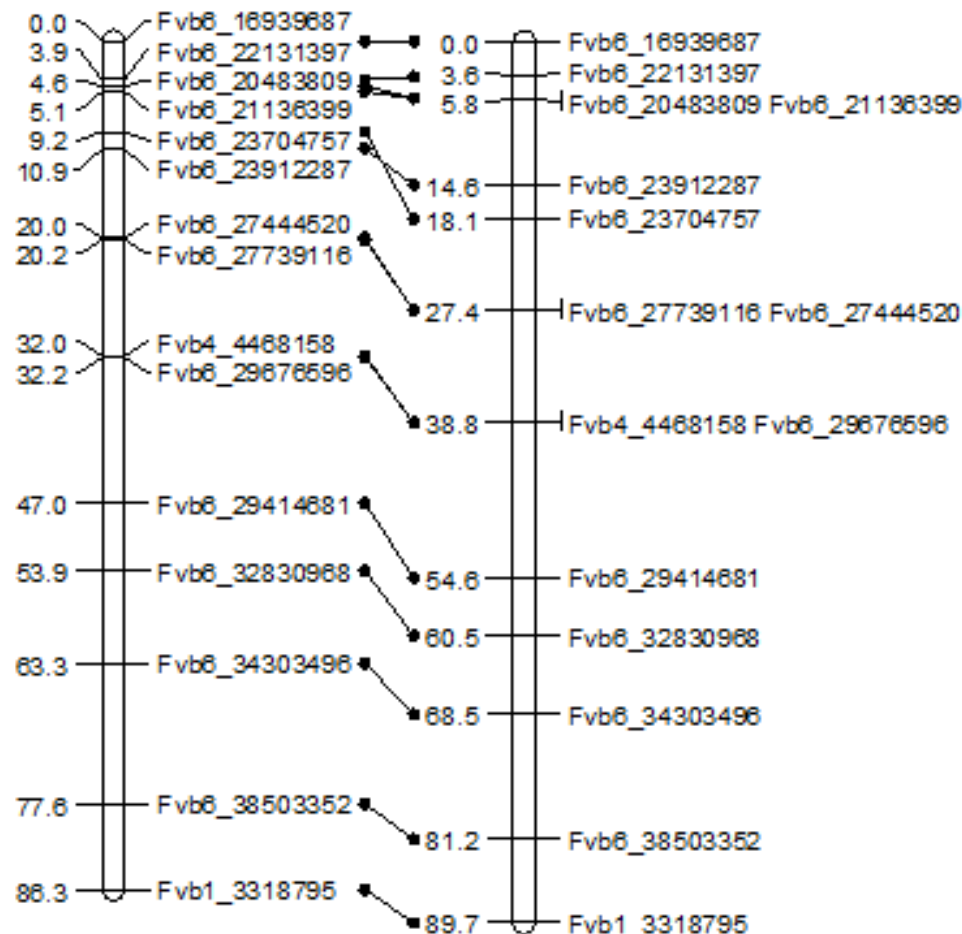

# Fvb 6

## Tribute\_9

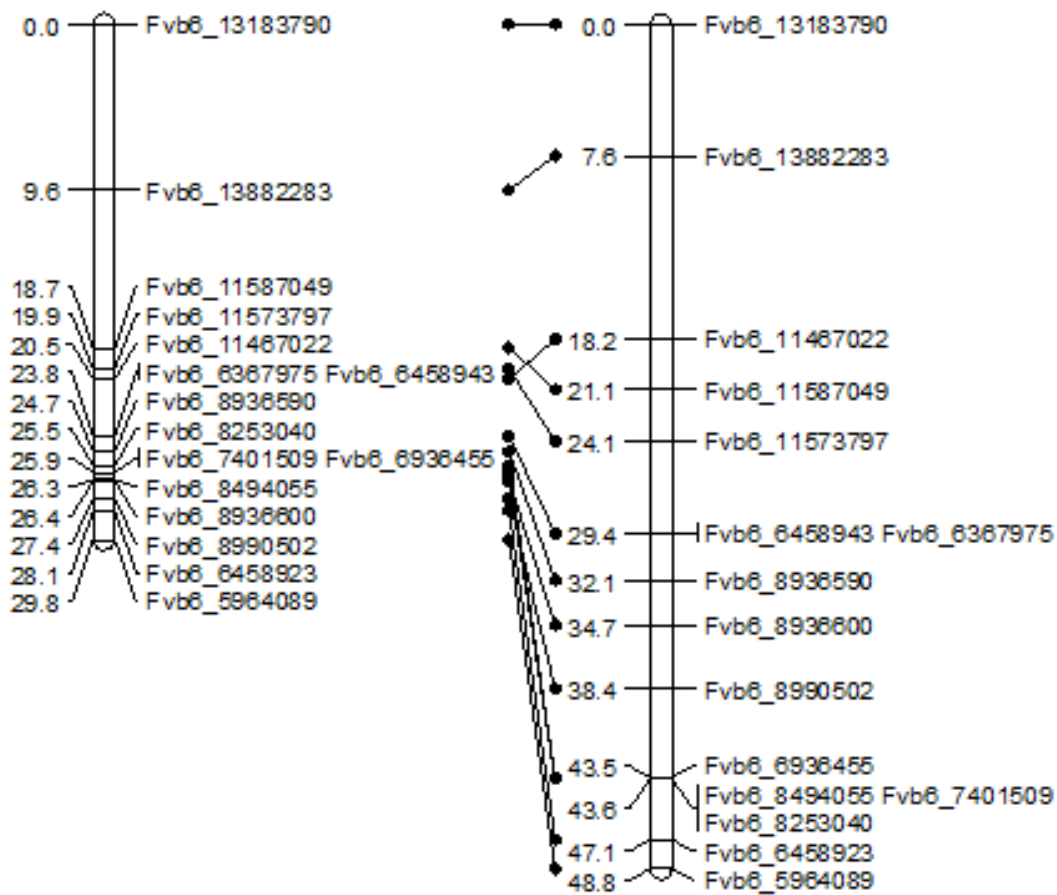

## Tribute\_27

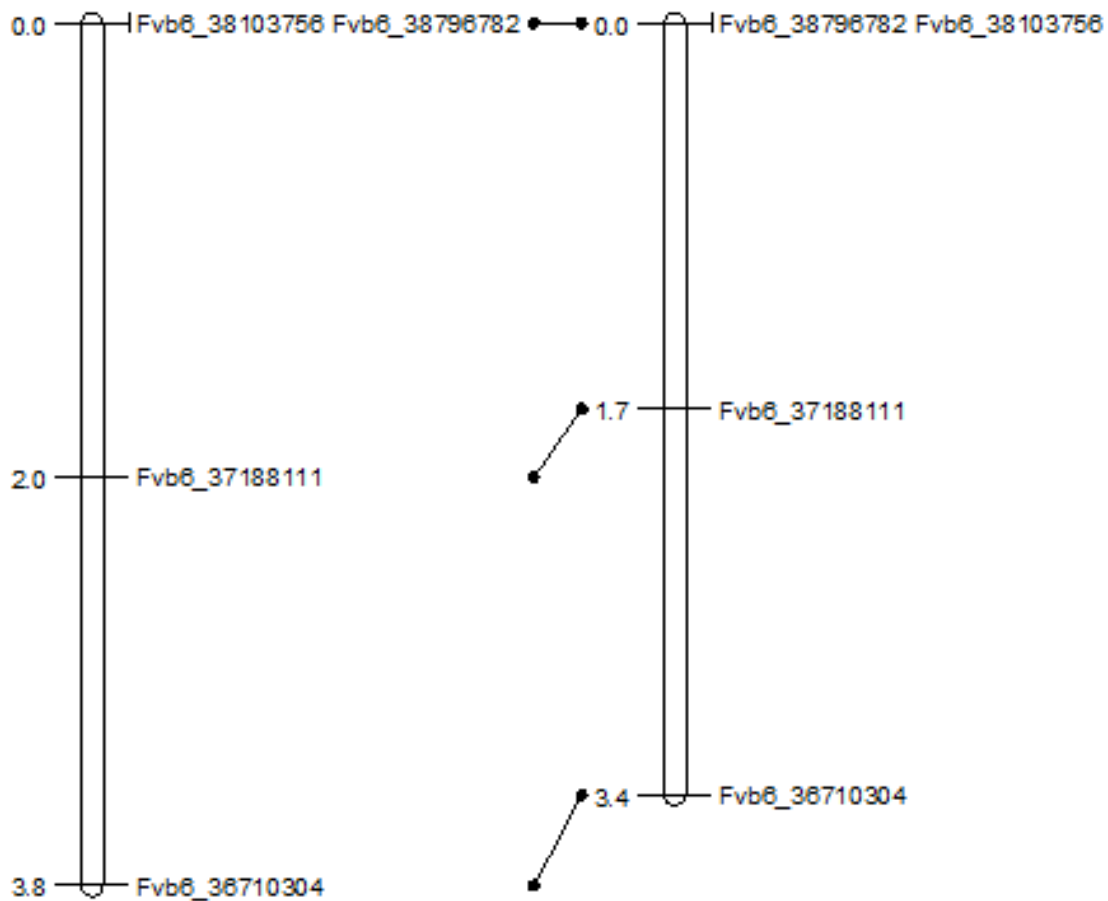

# Fvb 6

## Honeoye\_5

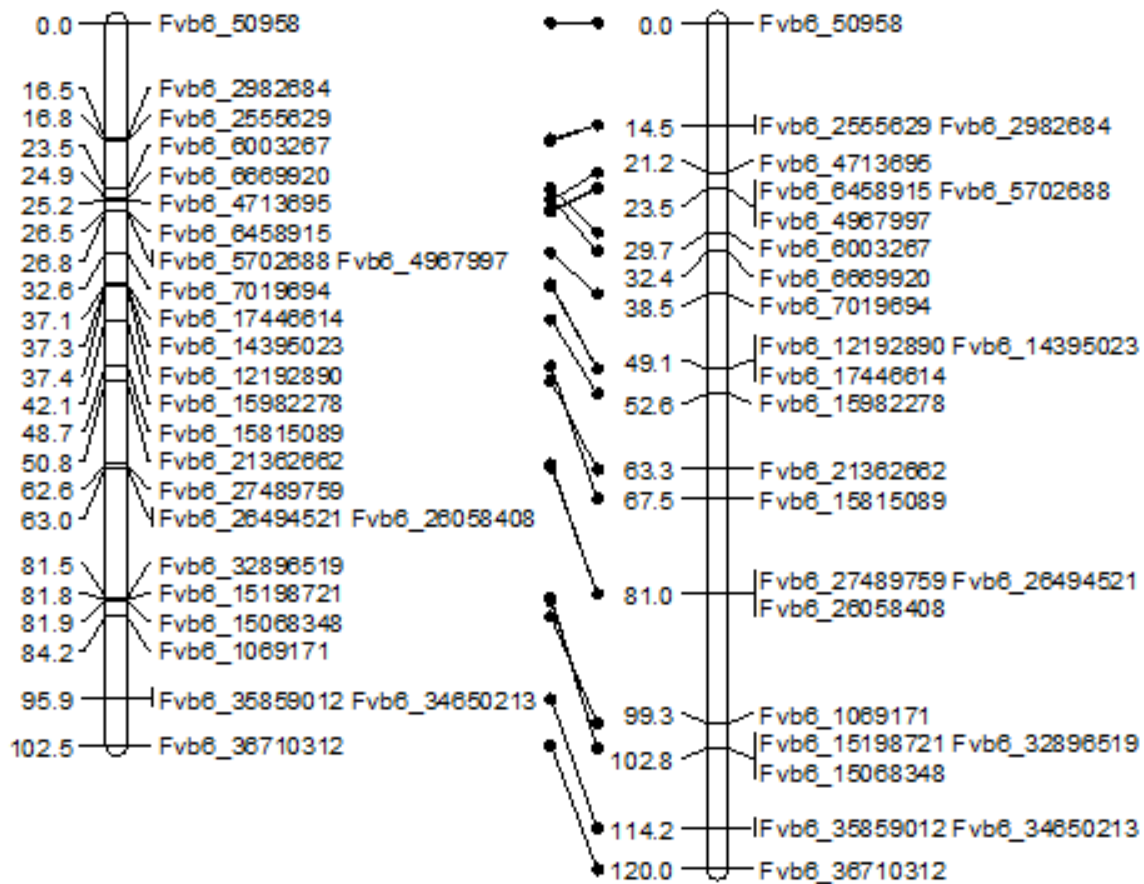

## Honeoye\_9

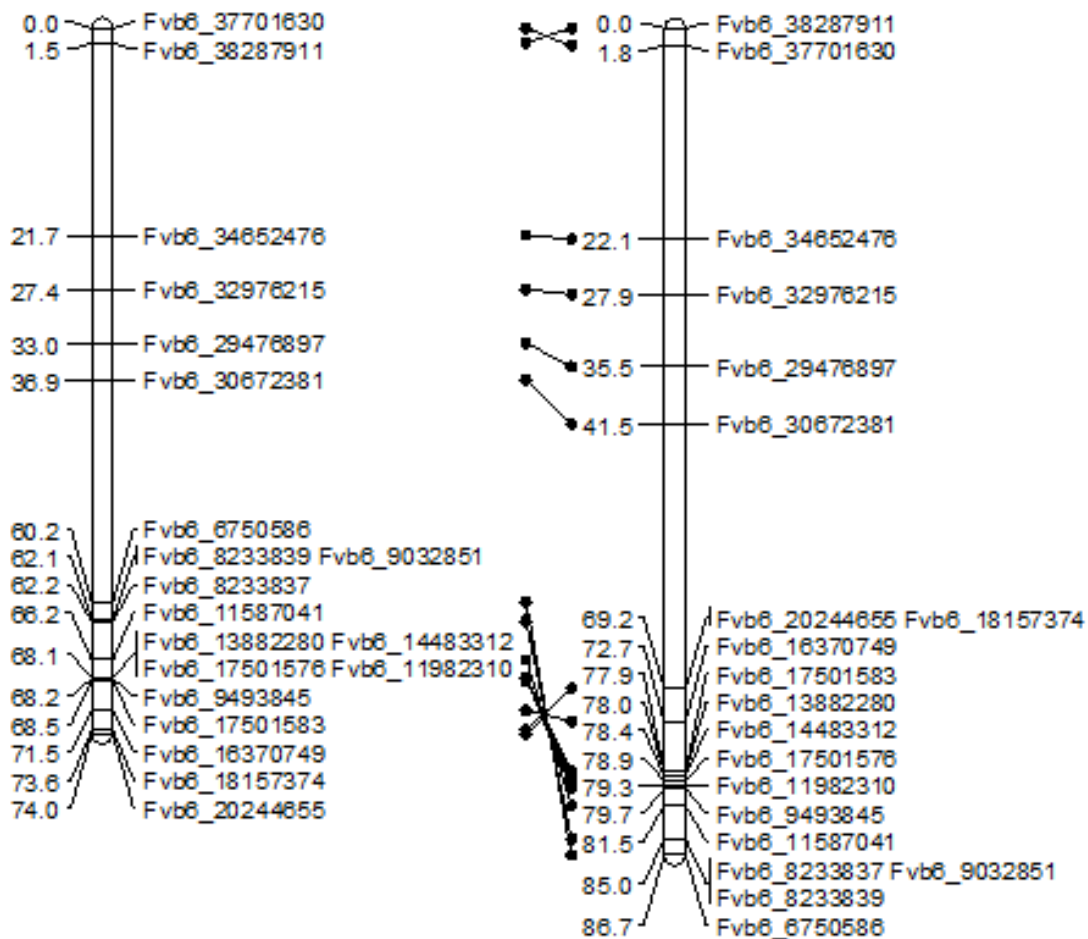



# Fvb 6

## Honeoye\_16

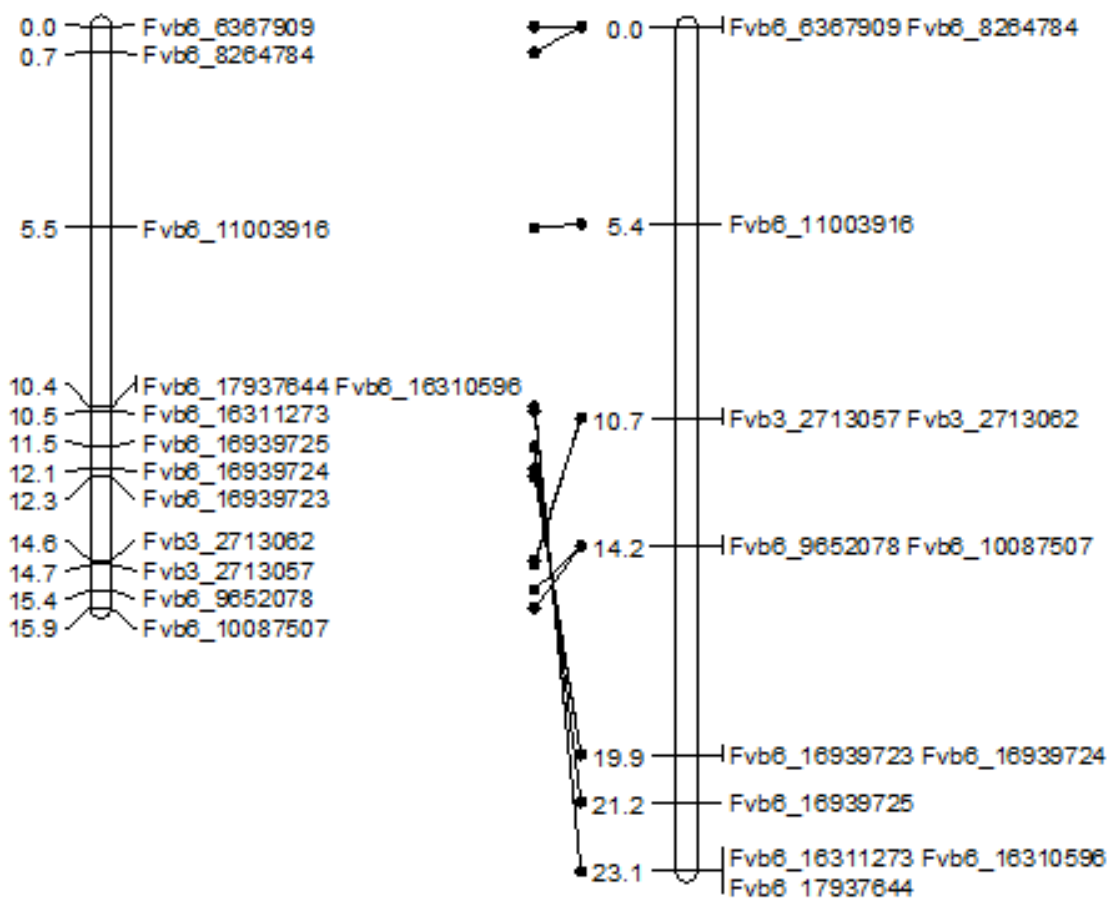

## Honeoye\_20

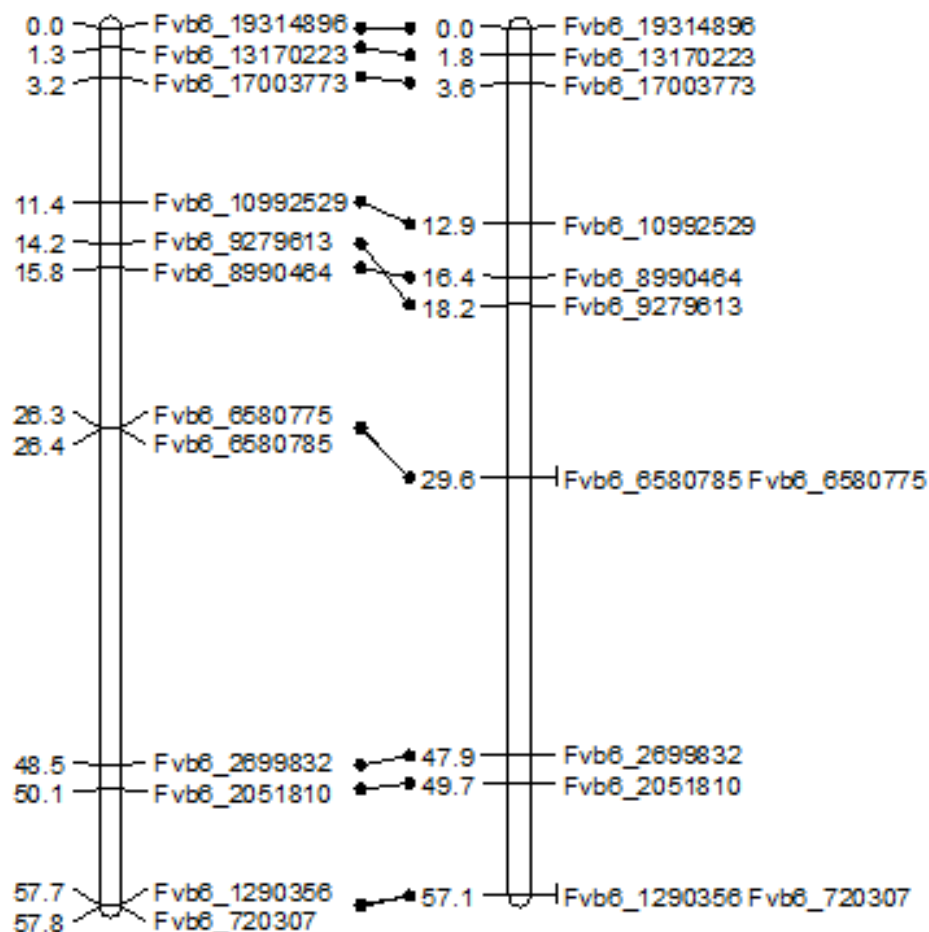

# Fvb 7

## Tribute\_12

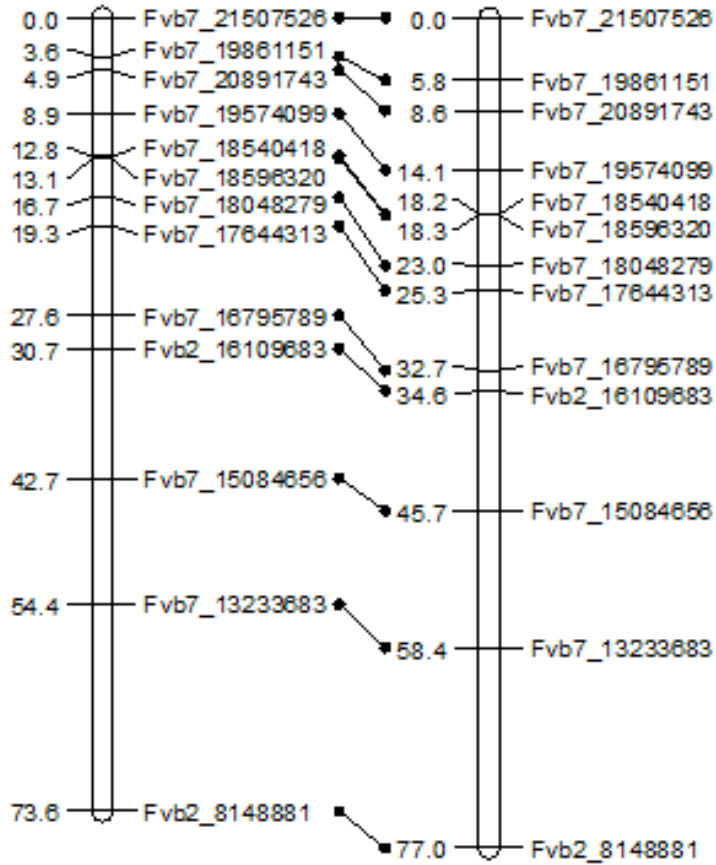

## Tribute\_18

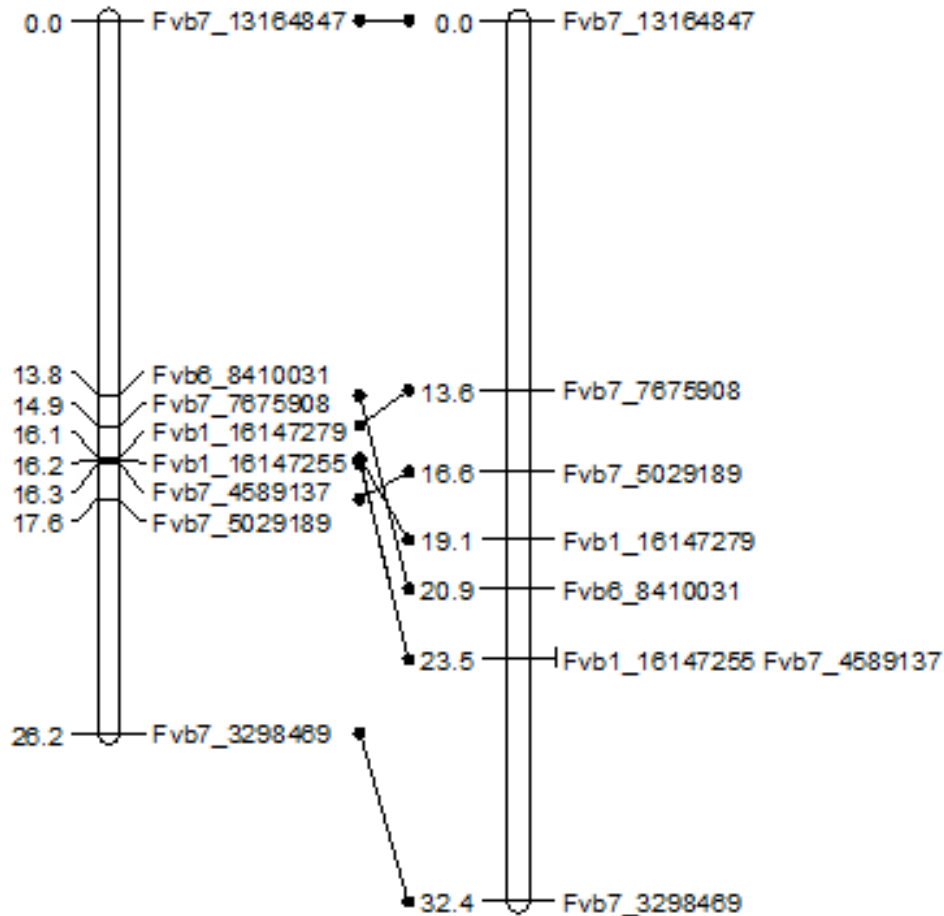

# Fvb 7

## Tribute\_20

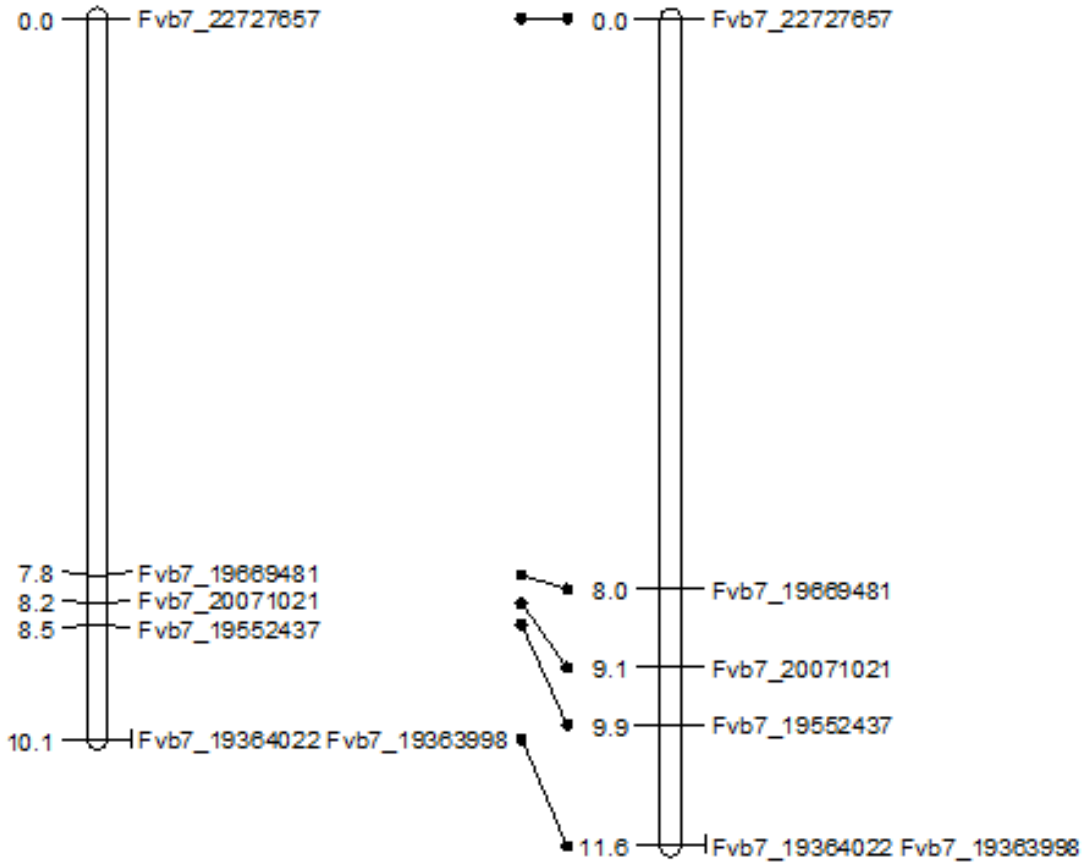

# Fvb 7

## Honeoye\_1

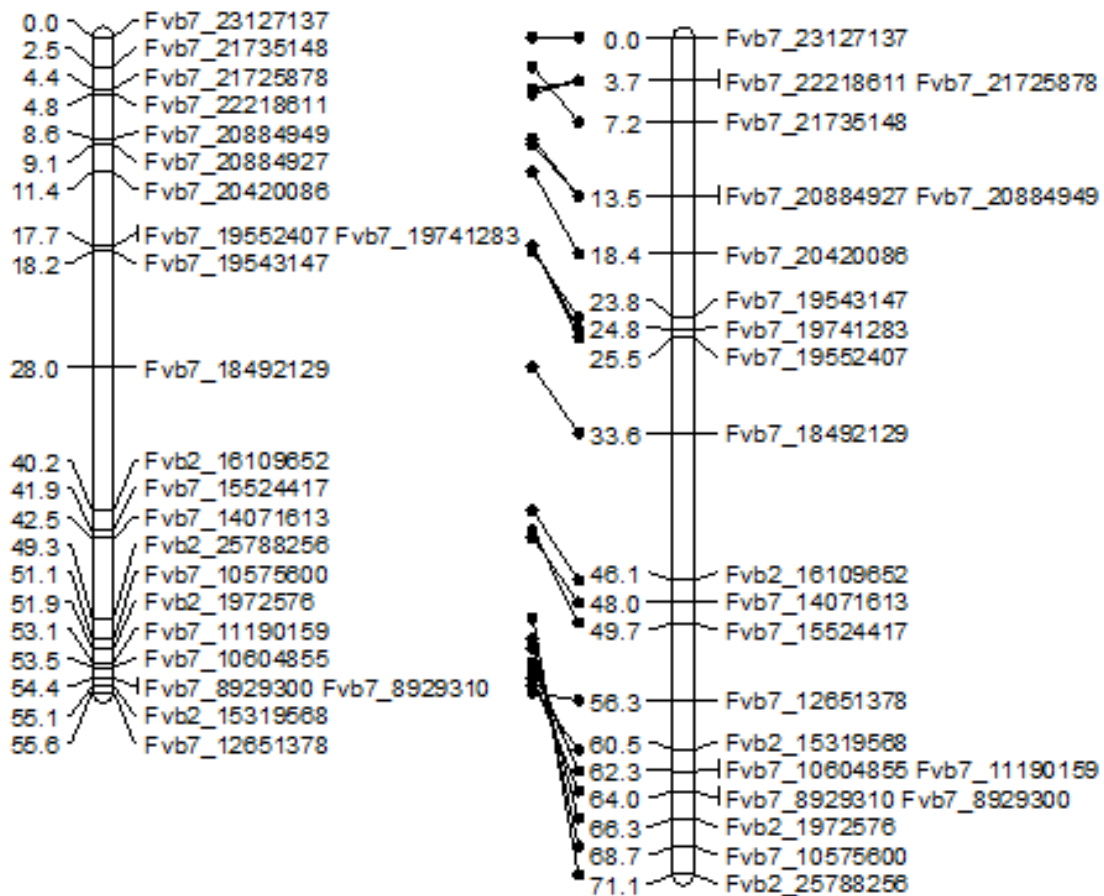

## Honeoye\_11

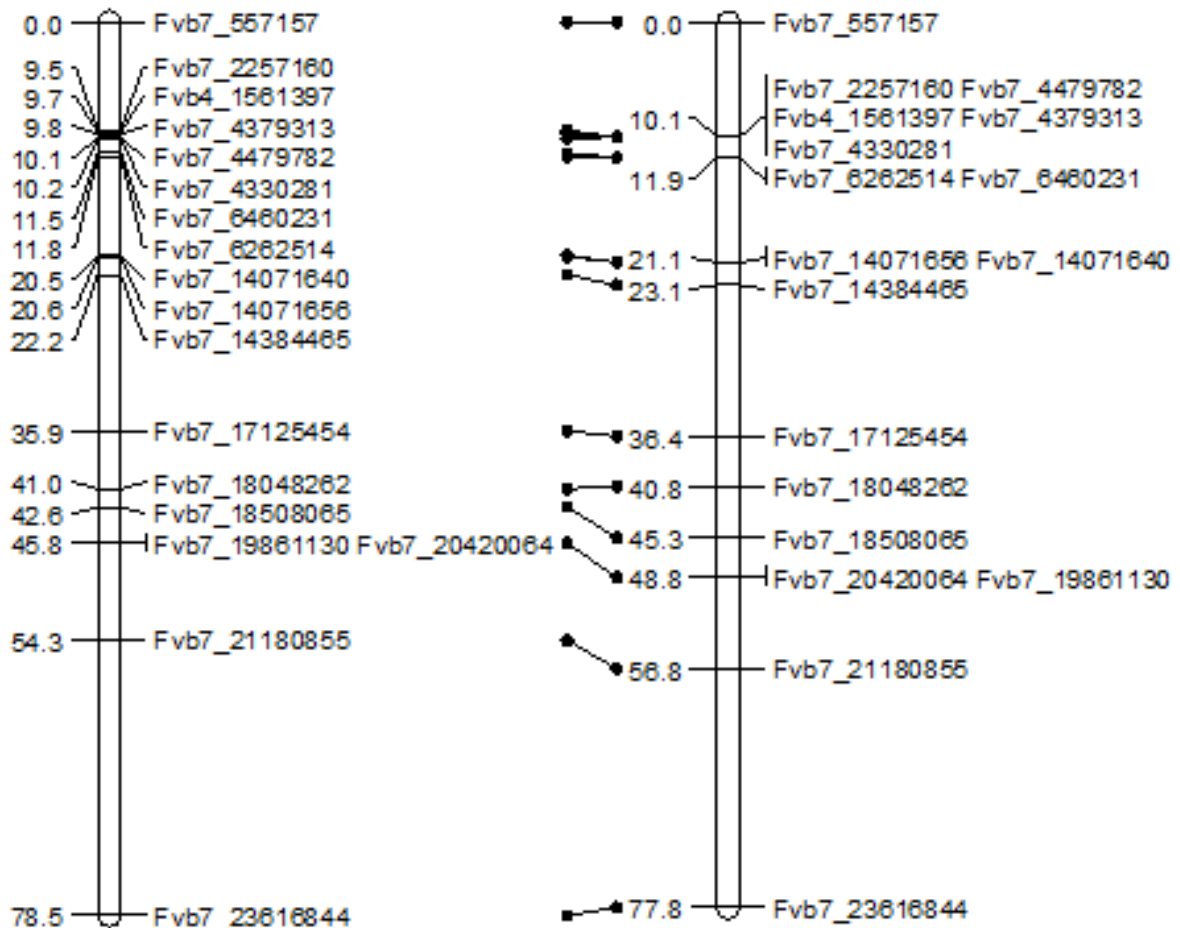

# Fvb 7

## Honeoye\_13

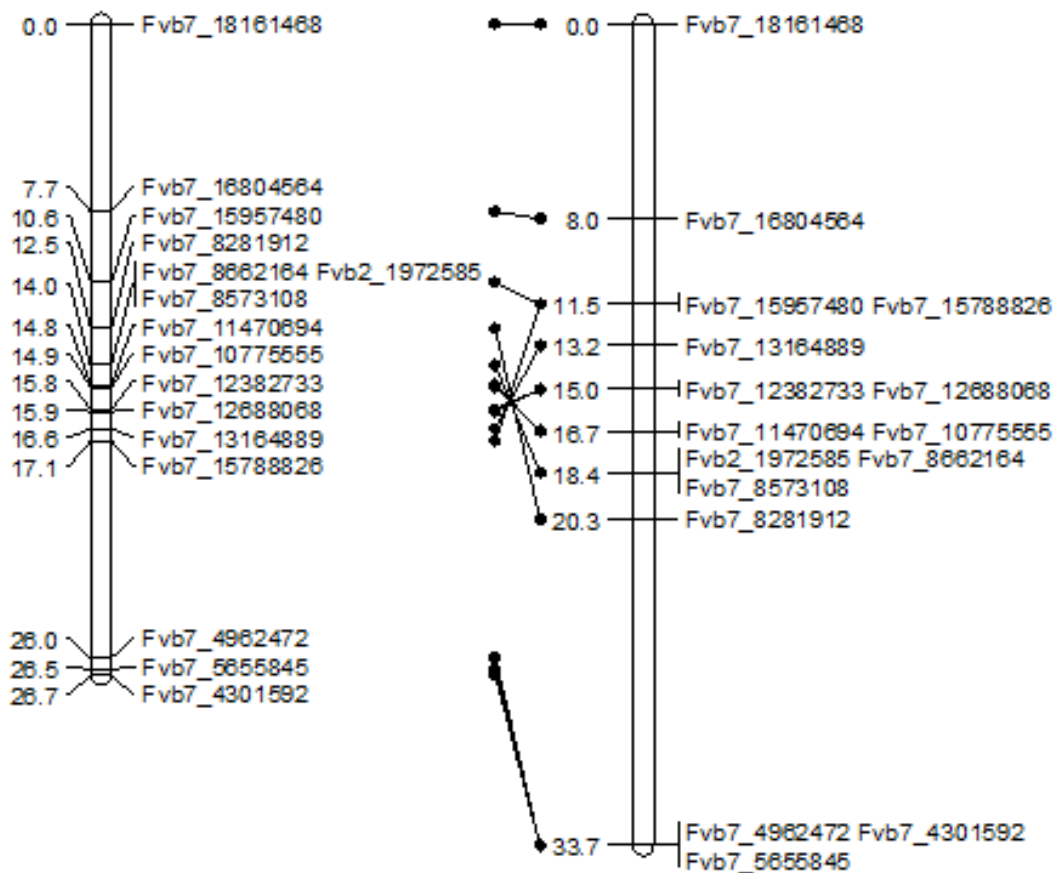

## Honeoye\_33

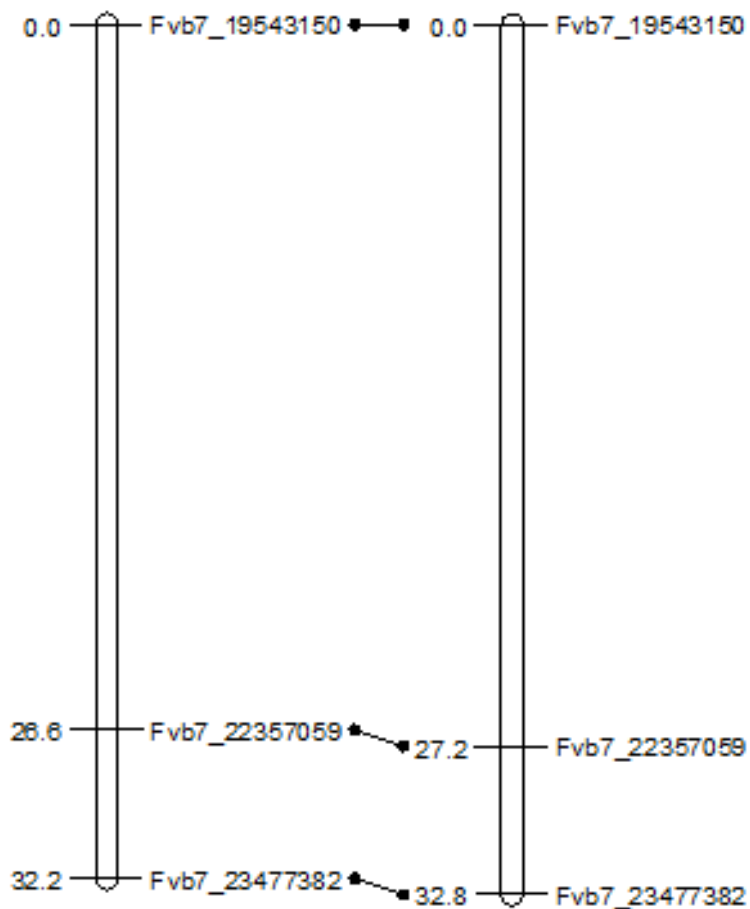

Supplement: peerj-05-3731-s003.pdf [file peerj-05-3731-s003.pdf]
