# Supplementary material for: Genotyping-by-sequencing enables linkage mapping in three octoploid cultivated strawberry families
Source: PubMed Central journal article supplement (PMC5581533; doi:10.7717/peerj.3731), 2017-08-30

# Fvb 1

## Redgauntlet\_19

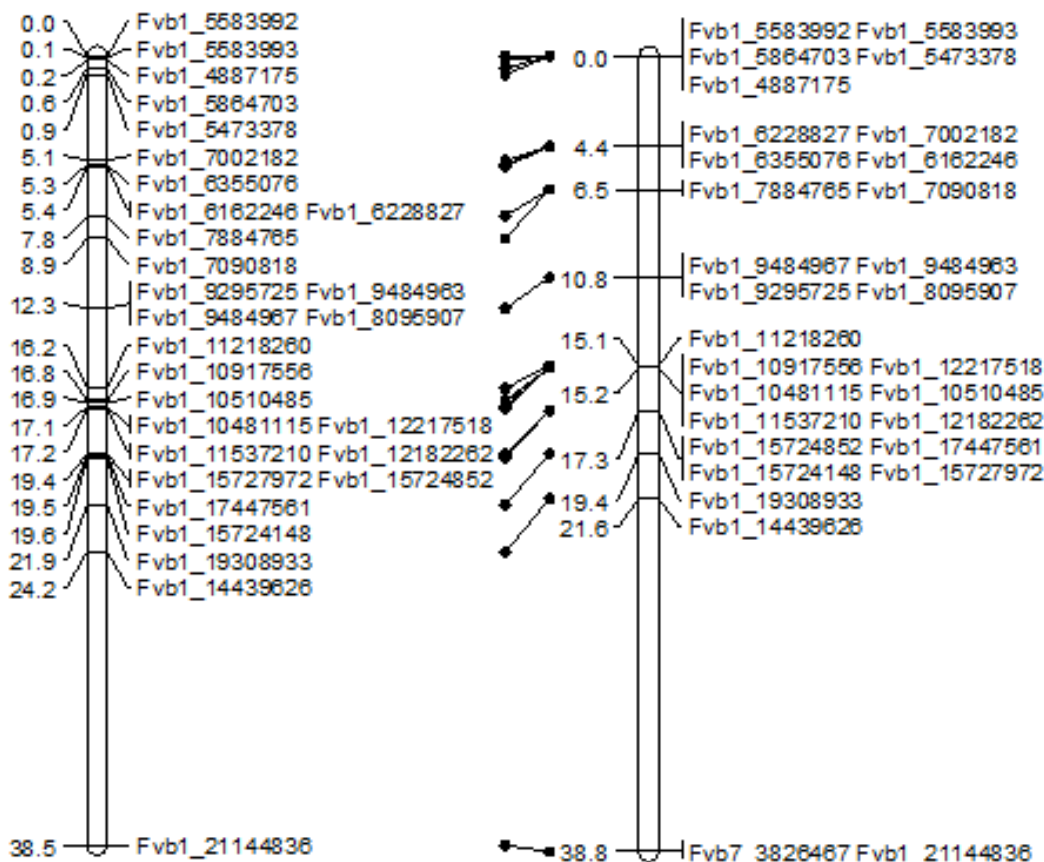

## Redgauntlet\_29

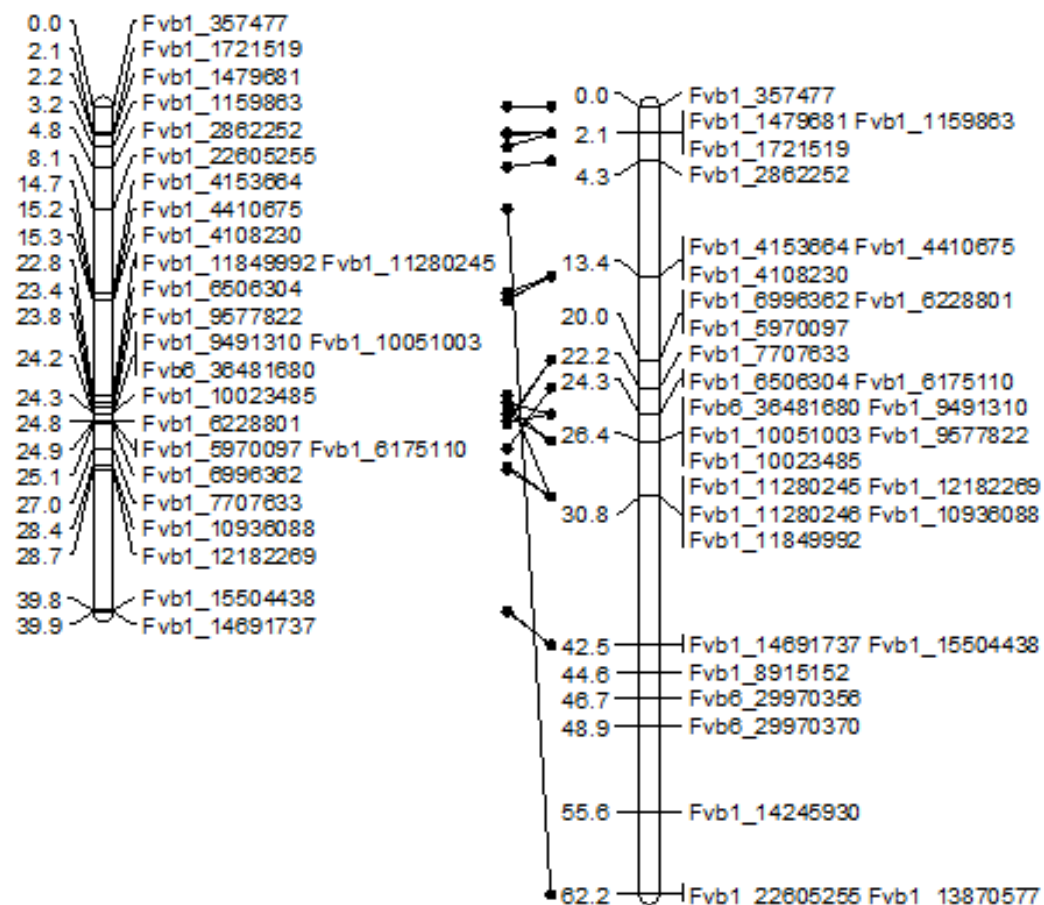

# Fvb 1

## Redgauntlet\_38

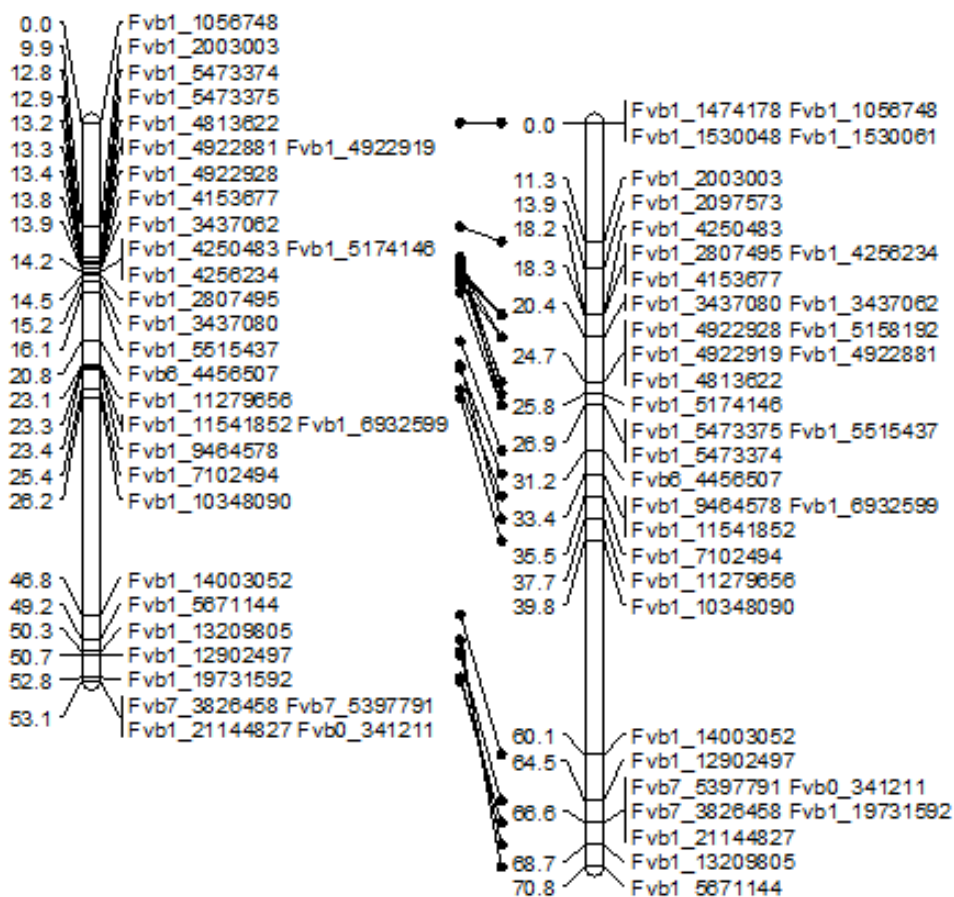

## Redgauntlet\_39

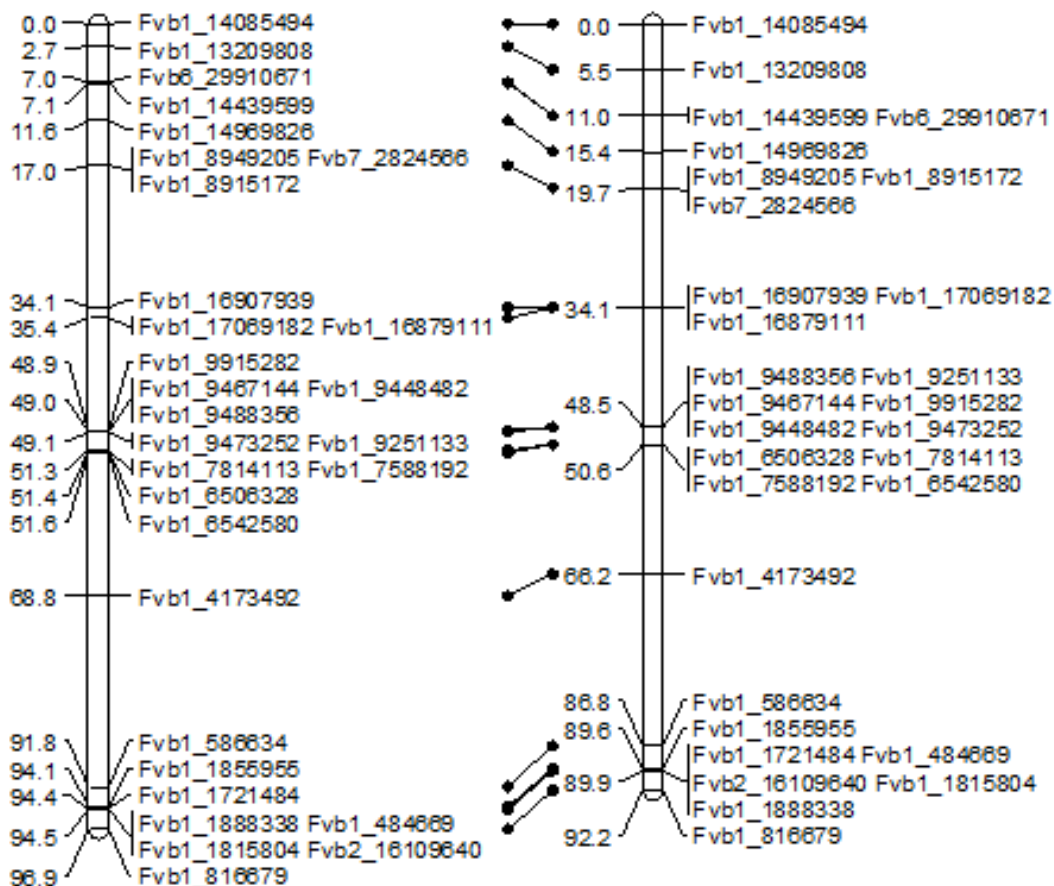

# Fvb 1

## Hapil\_8

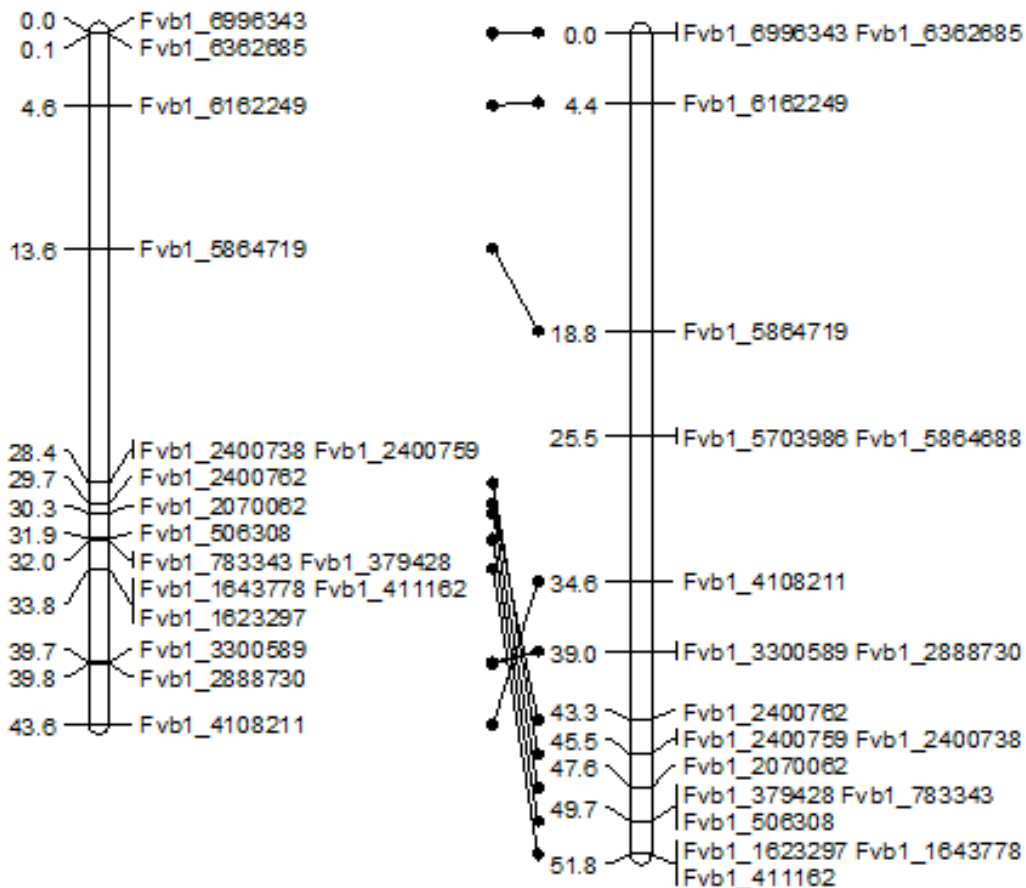

## Hapil\_16

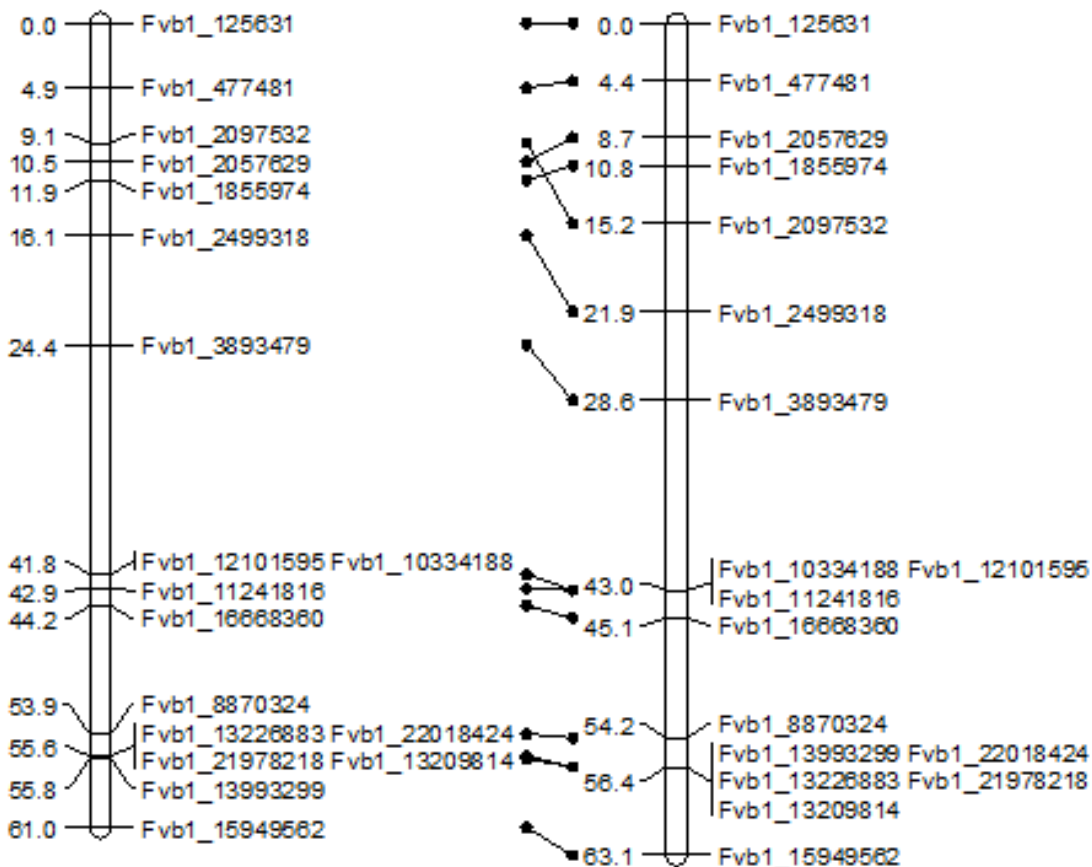

# Fvb 1

## Hapil\_18

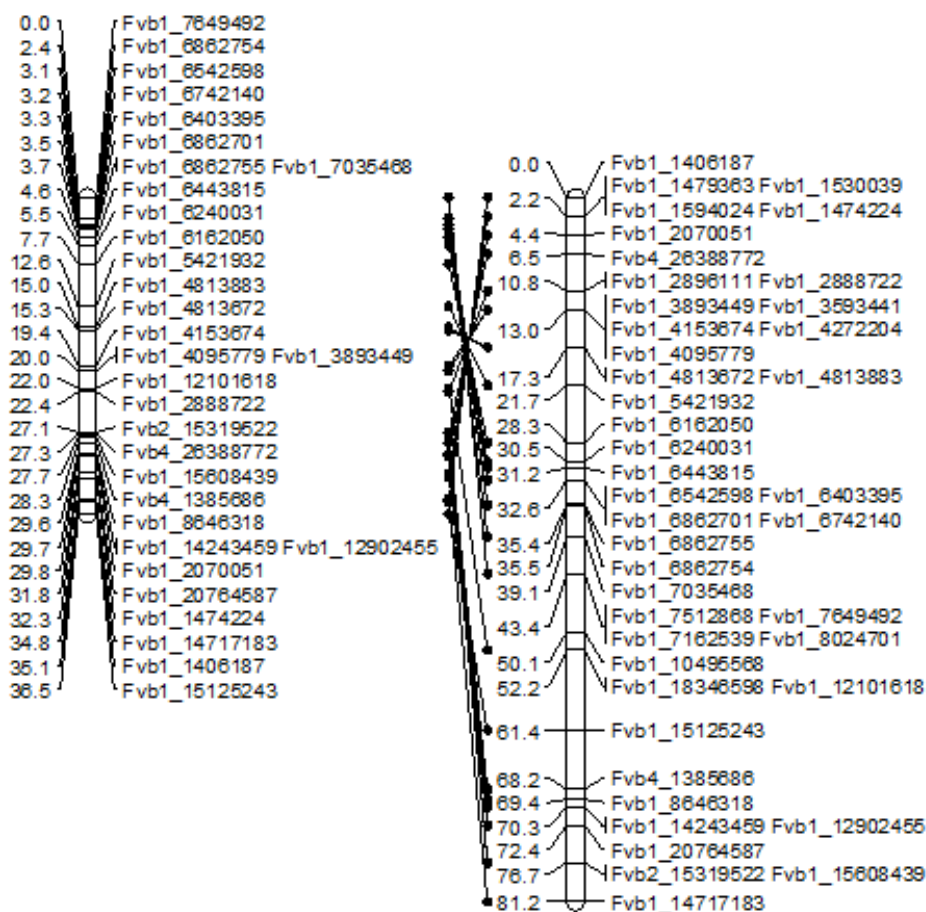

## Hapil\_27

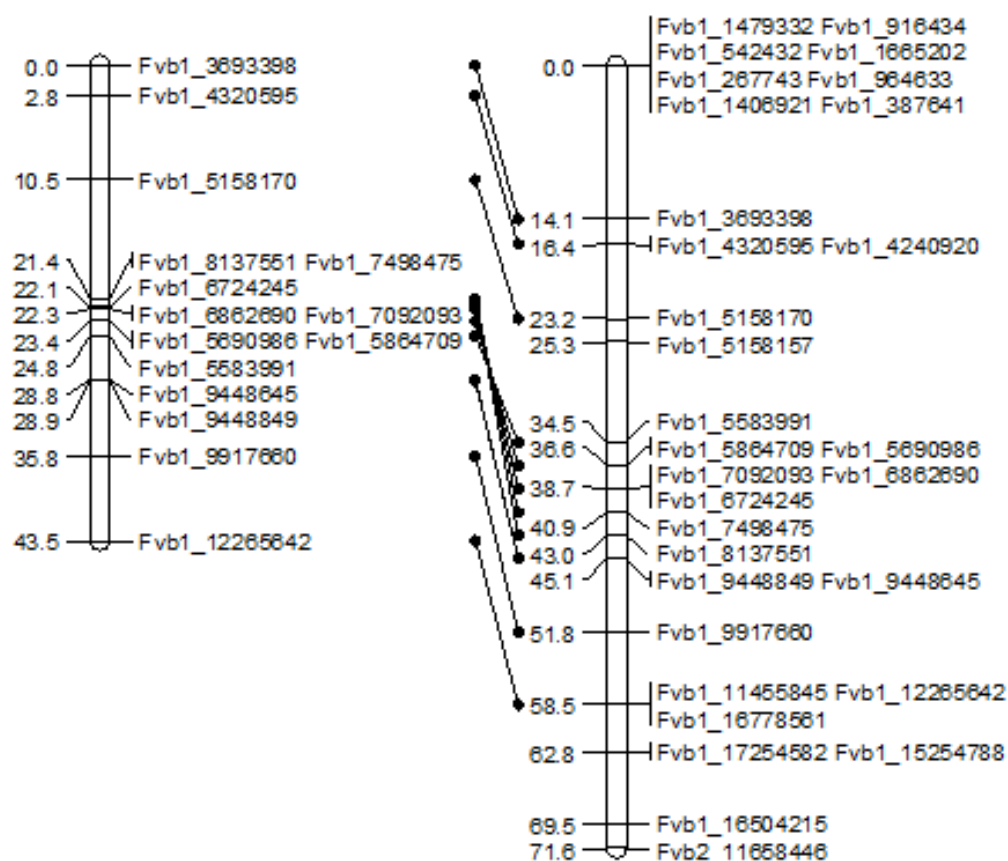

# Fvb 2

## Redgauntlet\_1

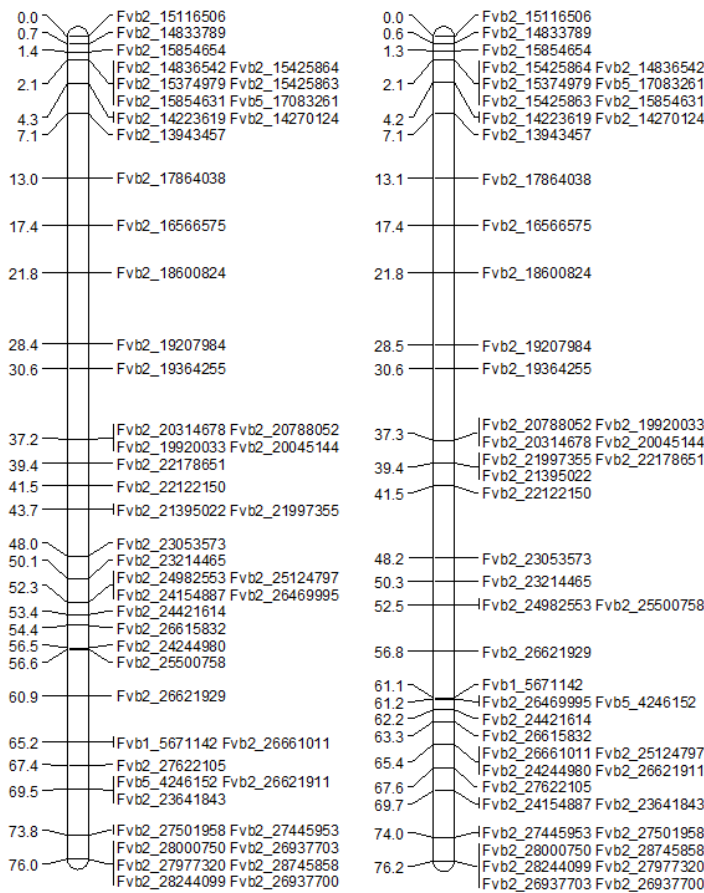

## Redgauntlet\_4

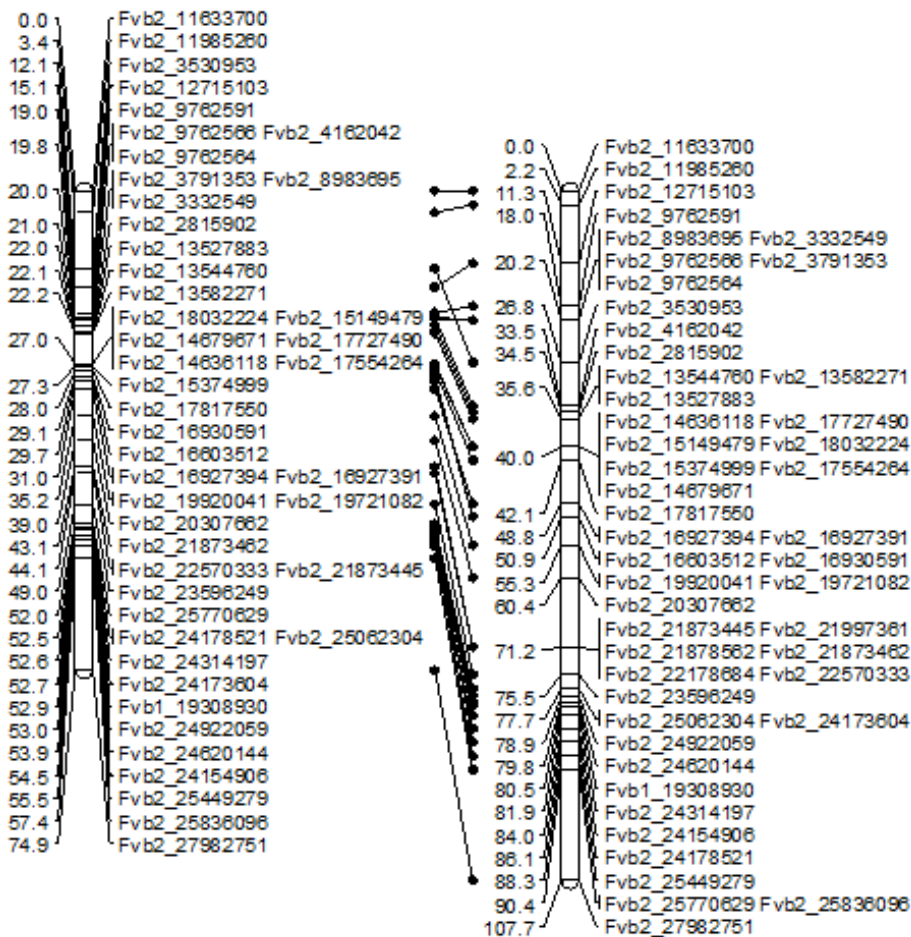

# Fvb 2

## Redgauntlet\_9

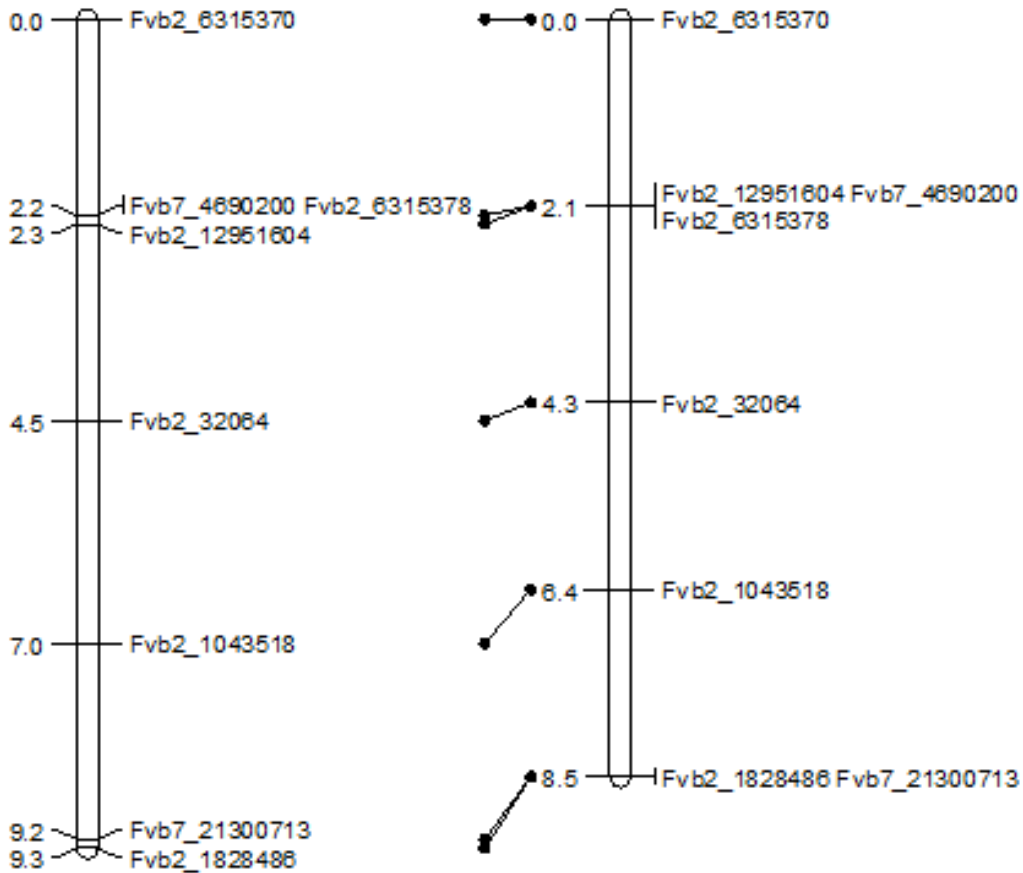

## Redgauntlet\_14

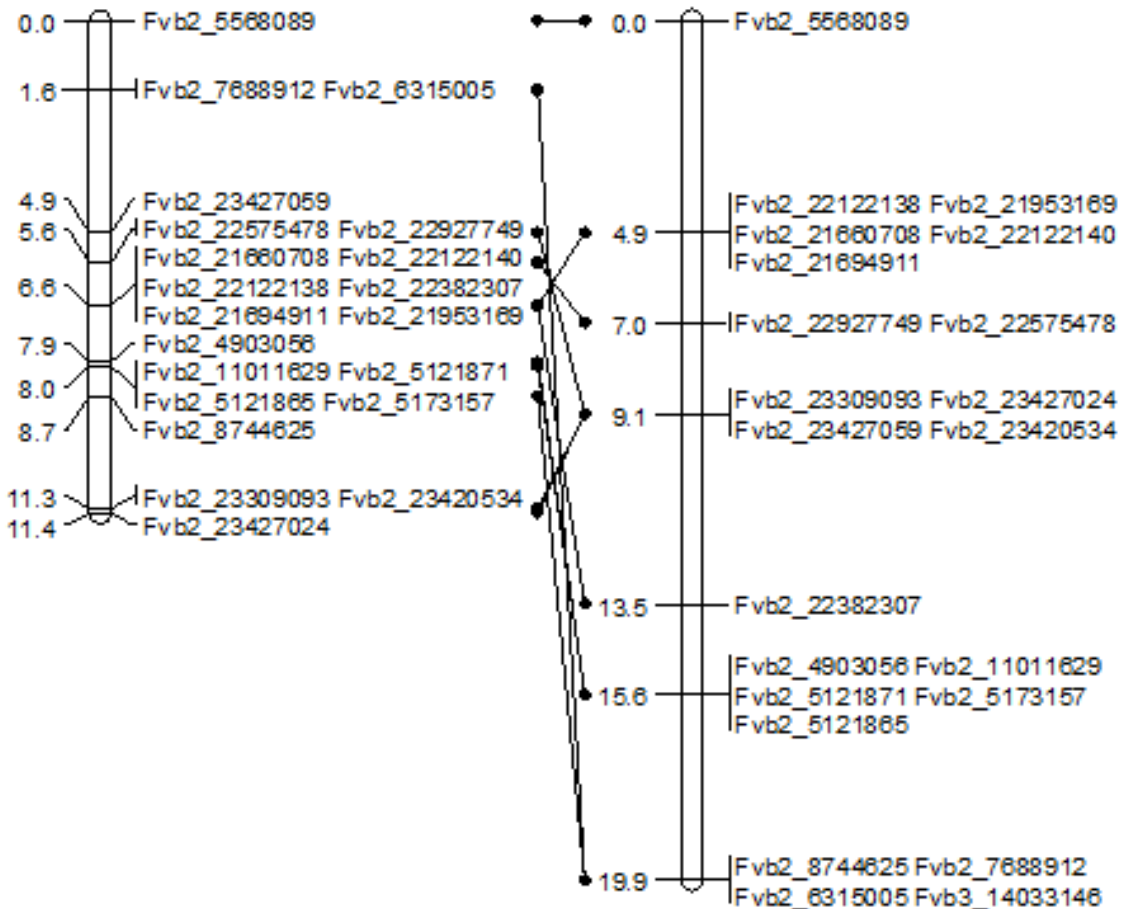

## Fvb 2

### Redgauntlet\_17

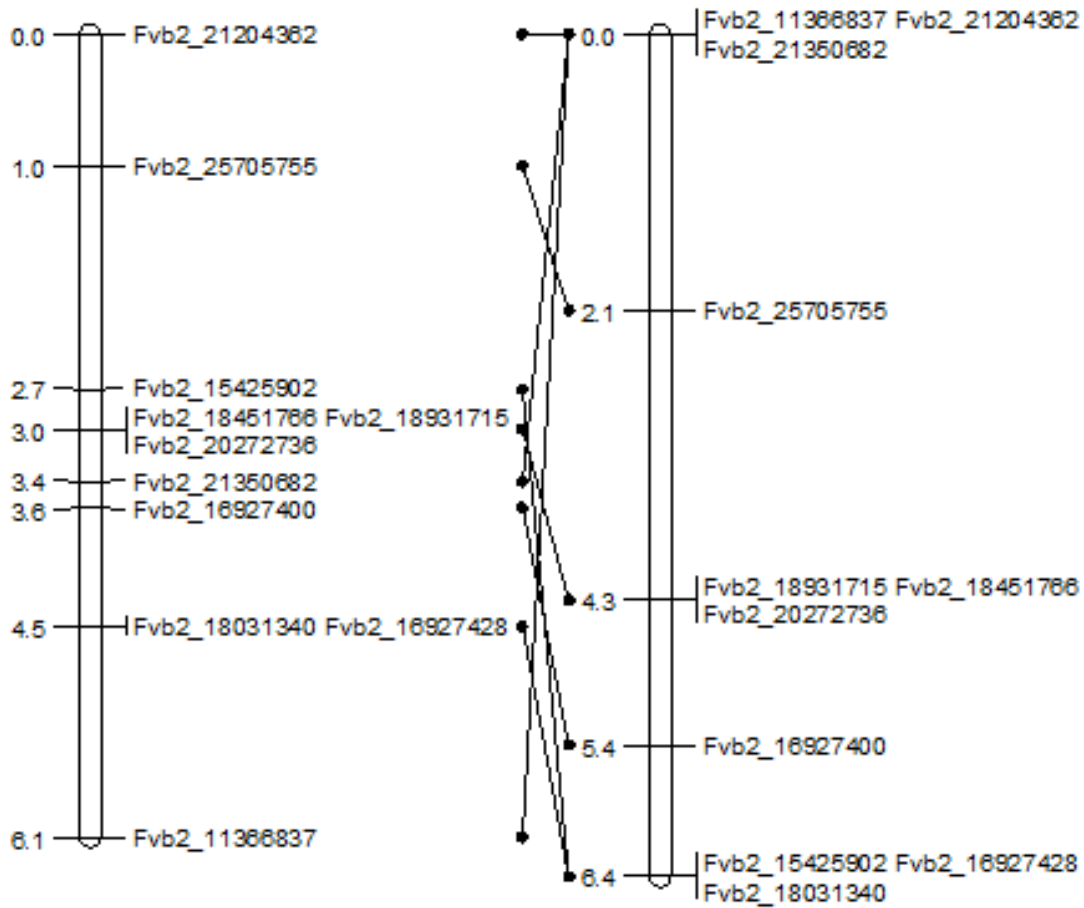

### Redgauntlet\_32

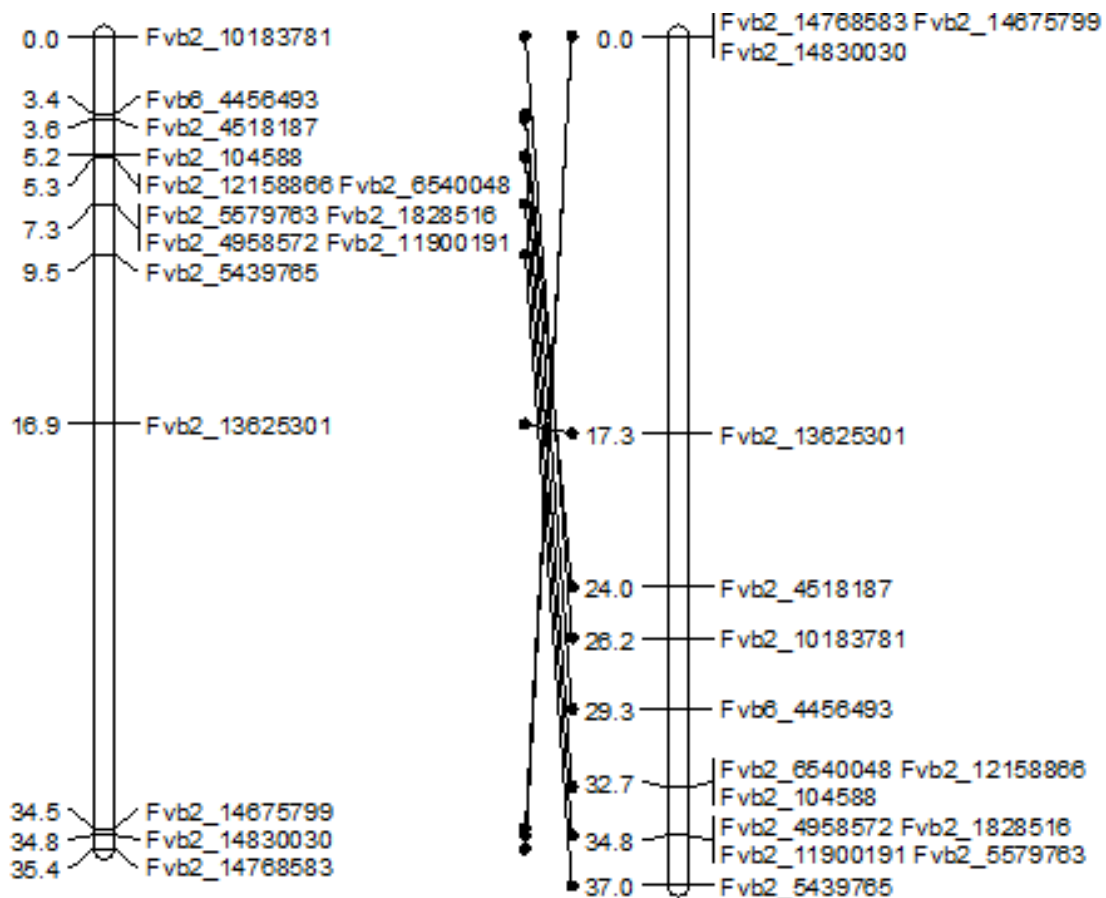

## Hapil\_7

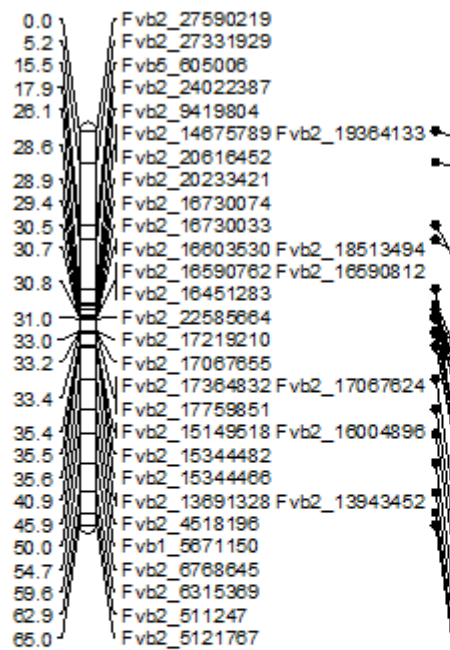

## Fvb\_2

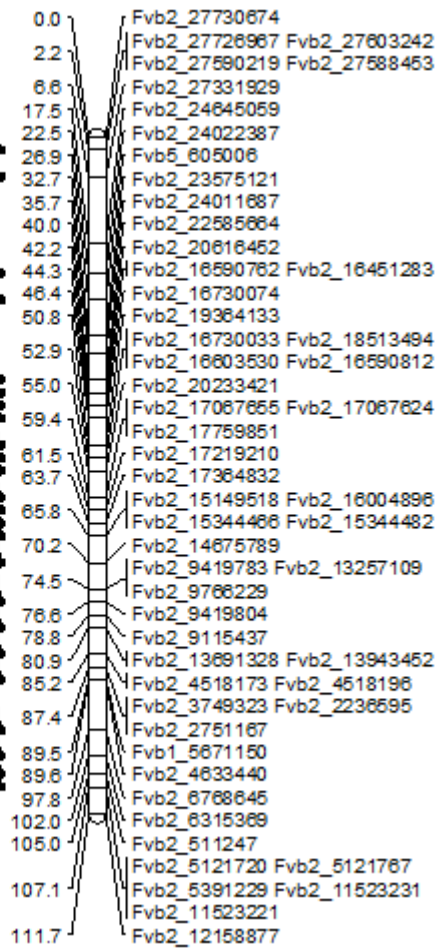

## Hapil\_13

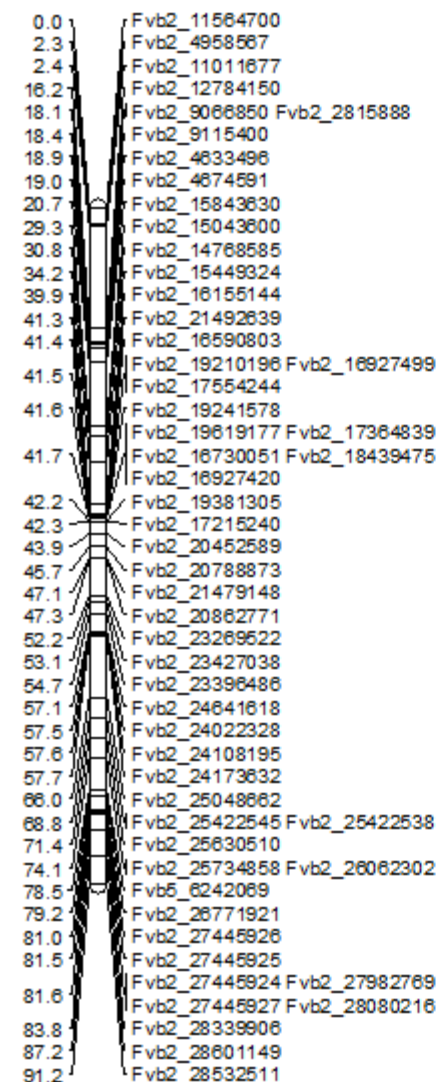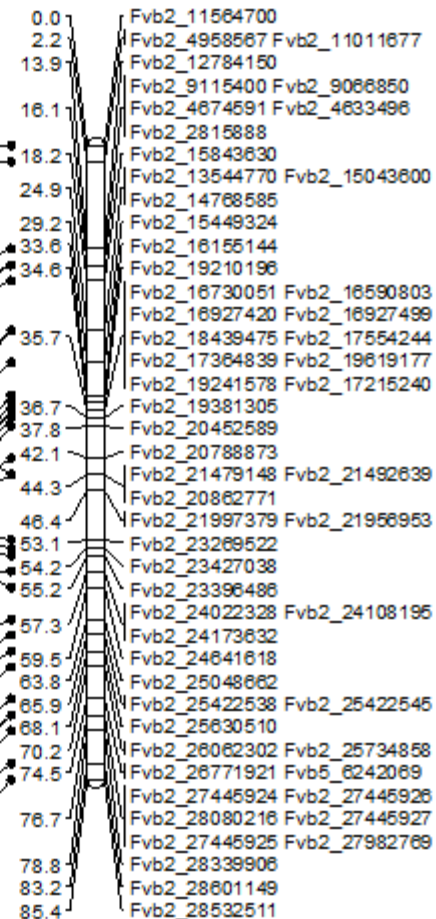



# Fvb 2

## Hapil\_15

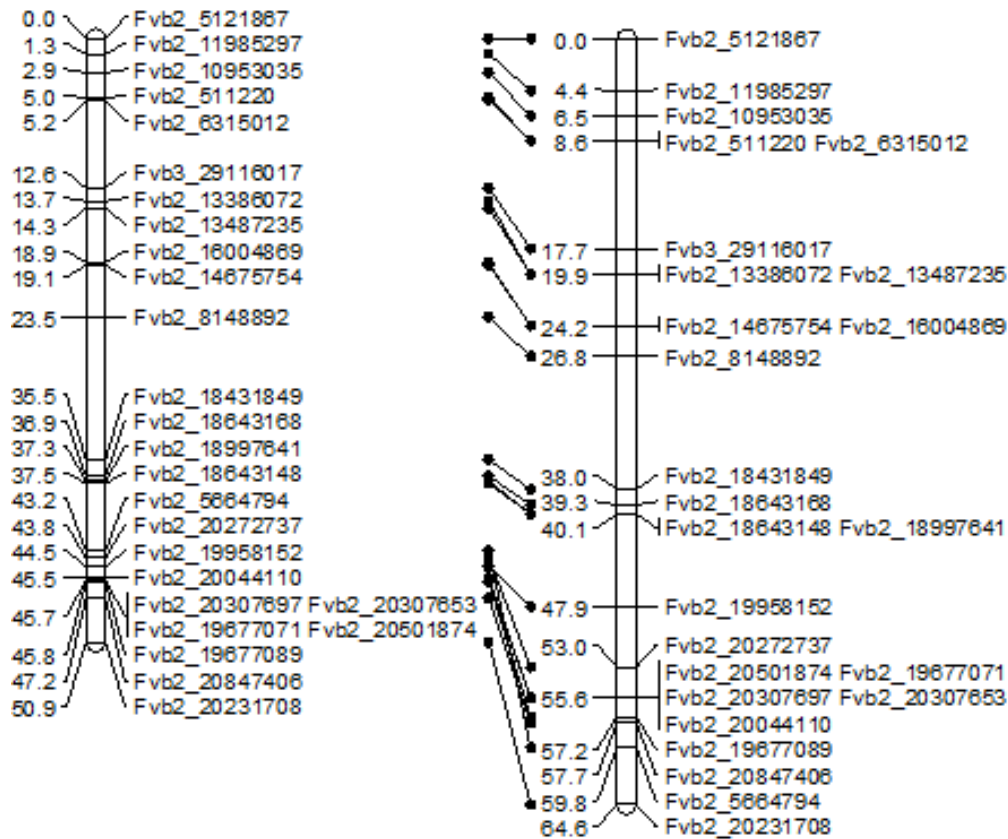

## Hapil\_26

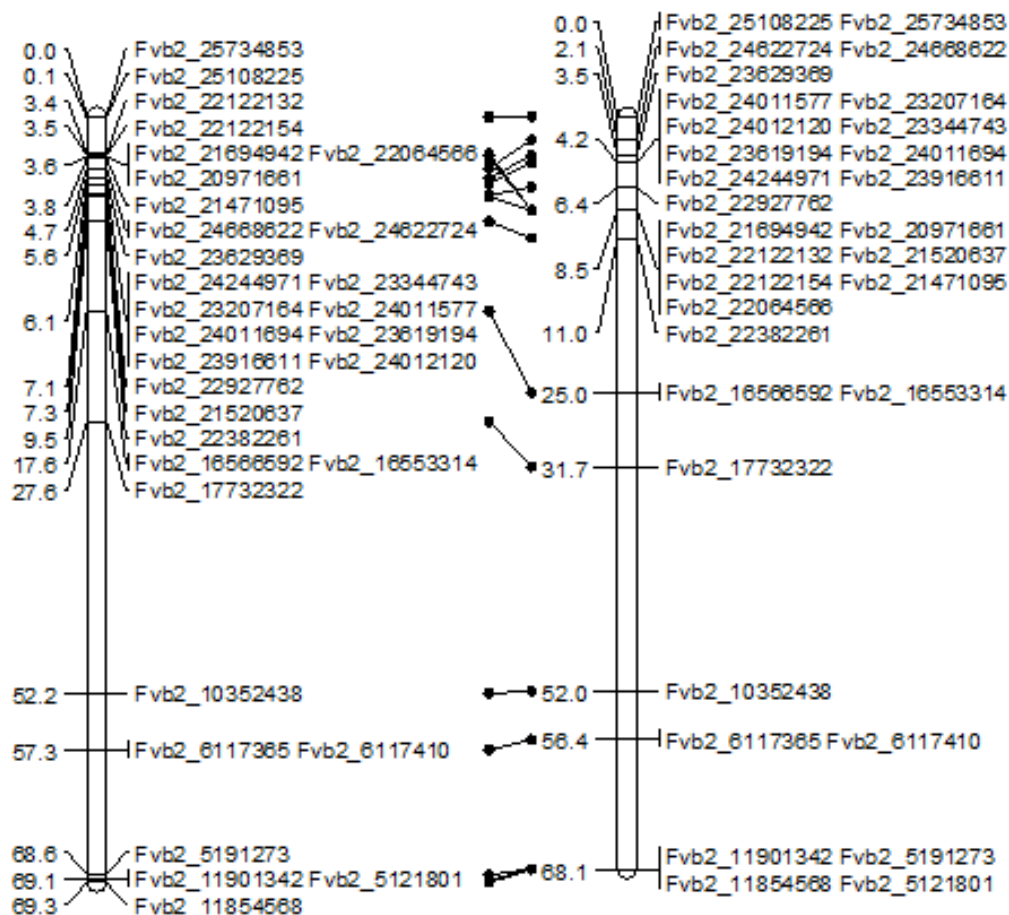

# Fvb 3

## Redgauntlet\_12

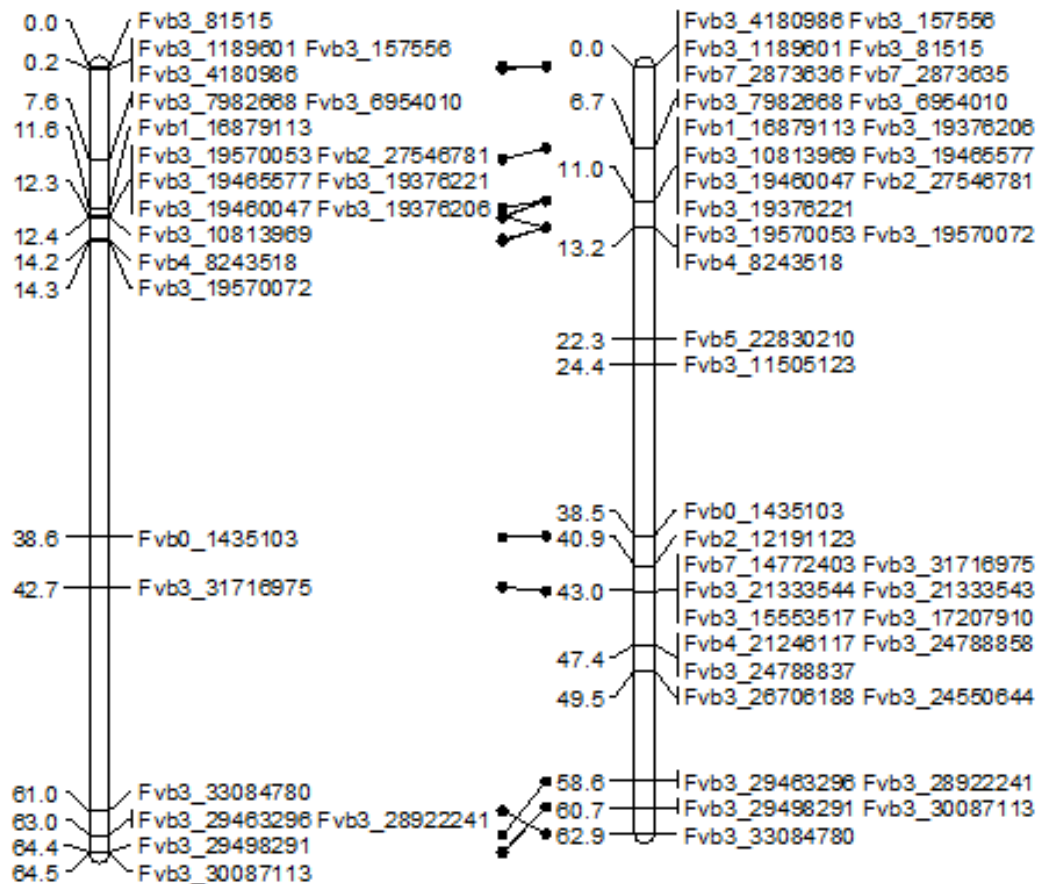

## Redgauntlet\_26

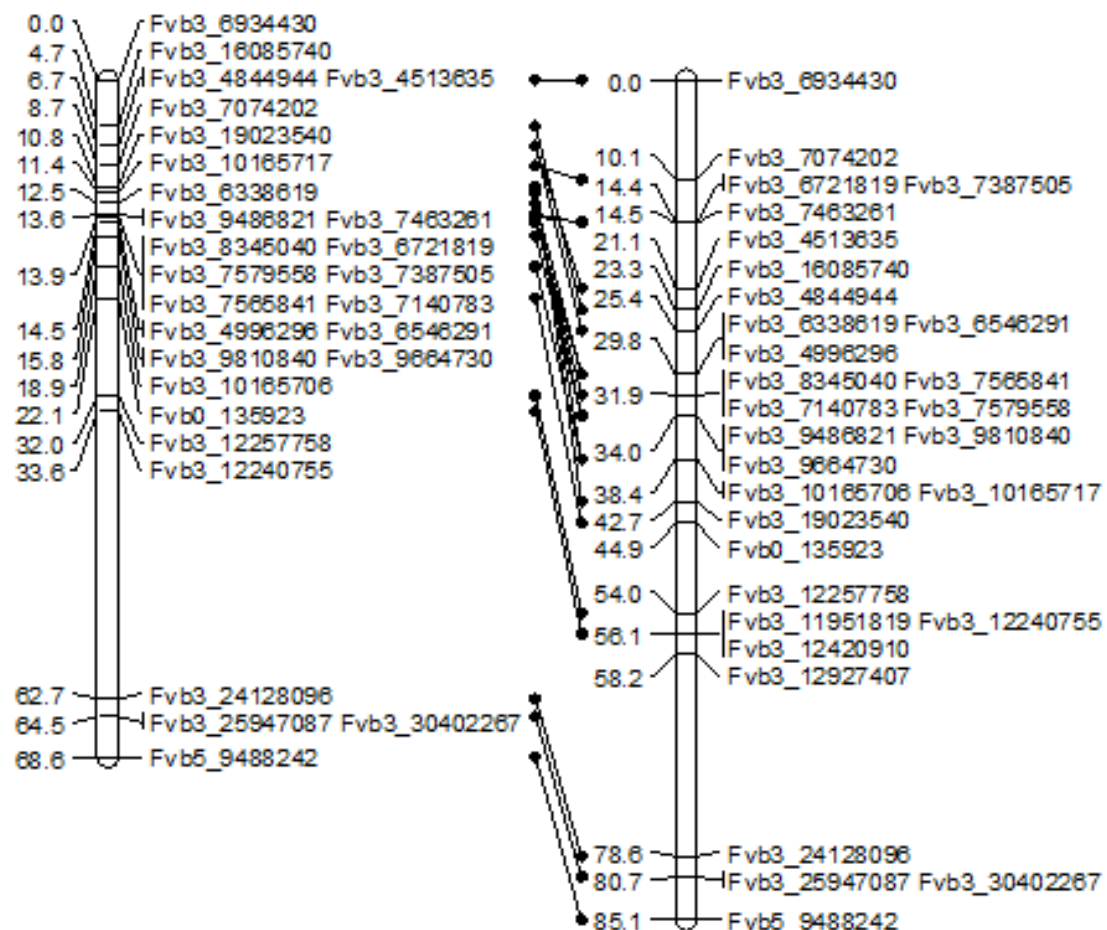

# Fvb 3

## Redgauntlet\_34

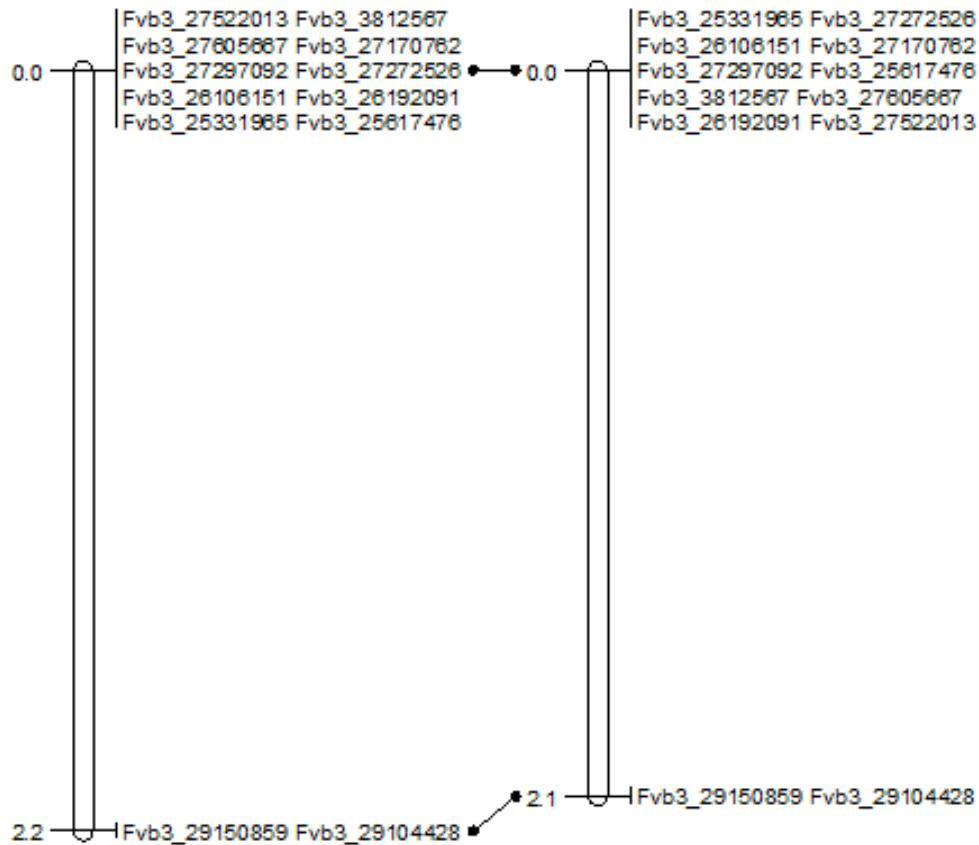

## Redgauntlet\_41

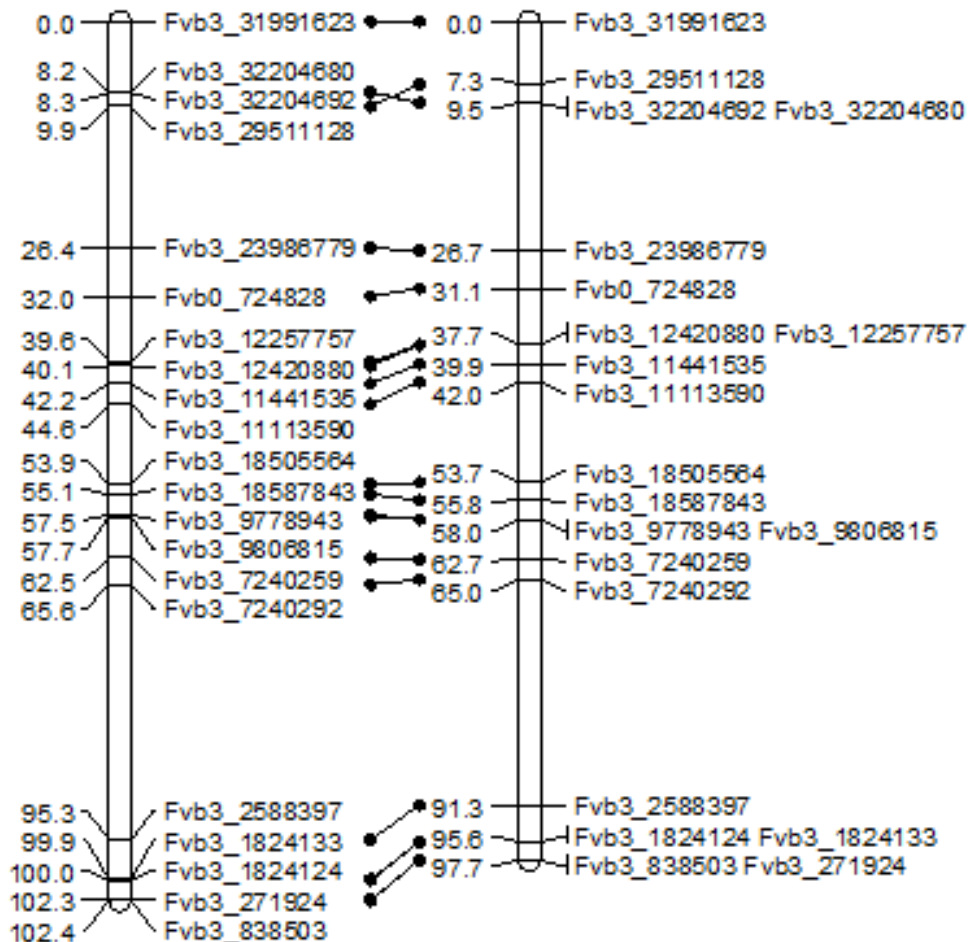

# Hapil\_10

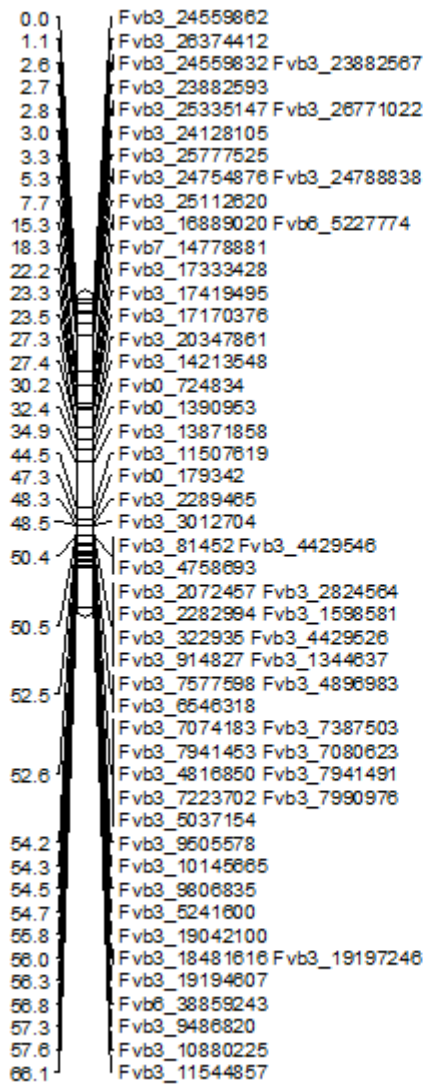

# Fvb 3

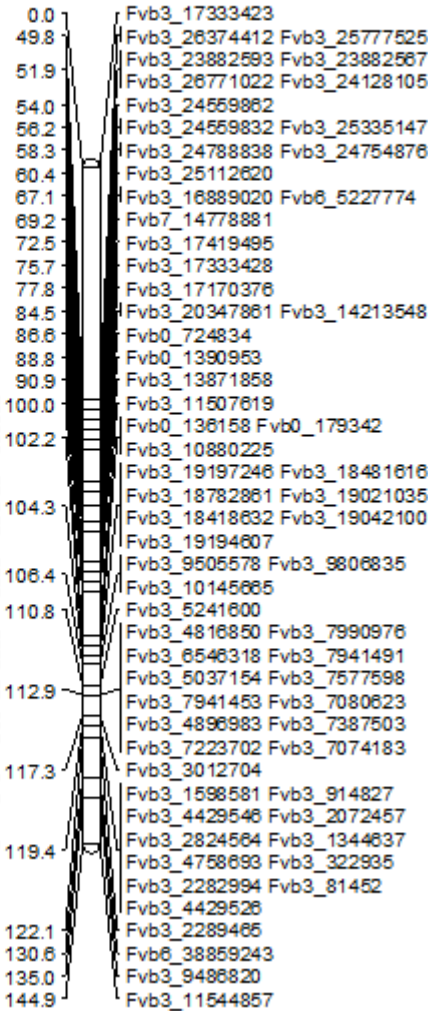

# Hapil\_11

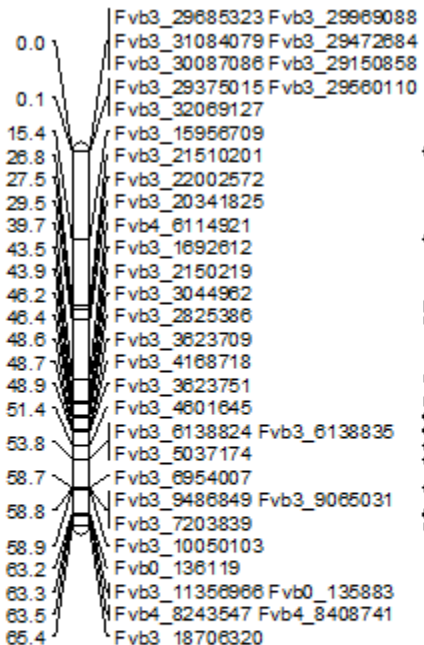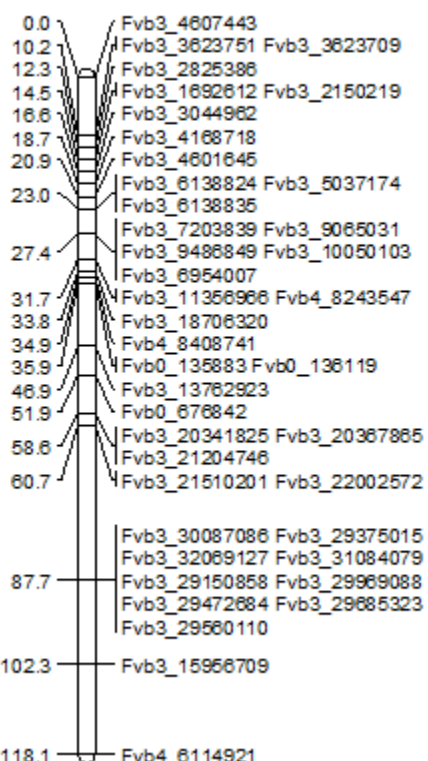

# Fvb 4

## Redgauntlet\_2

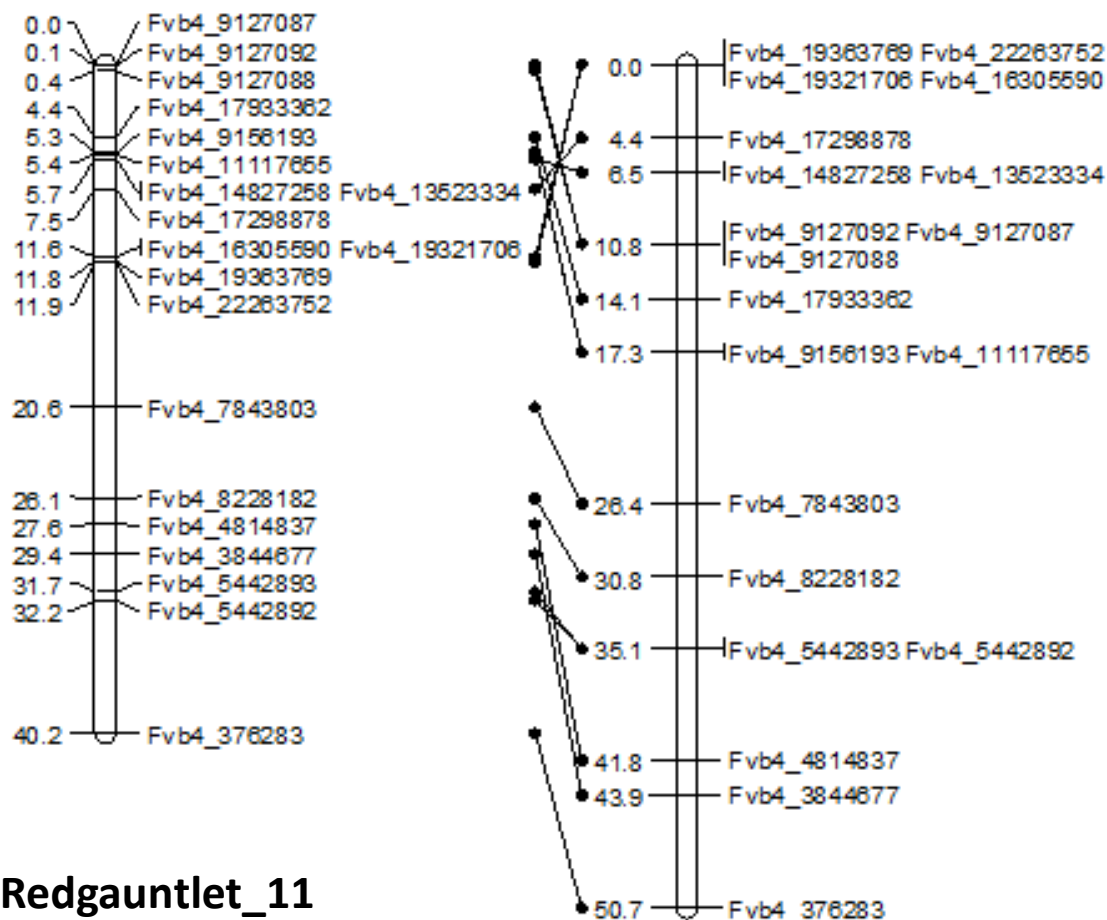

## Redgauntlet\_11

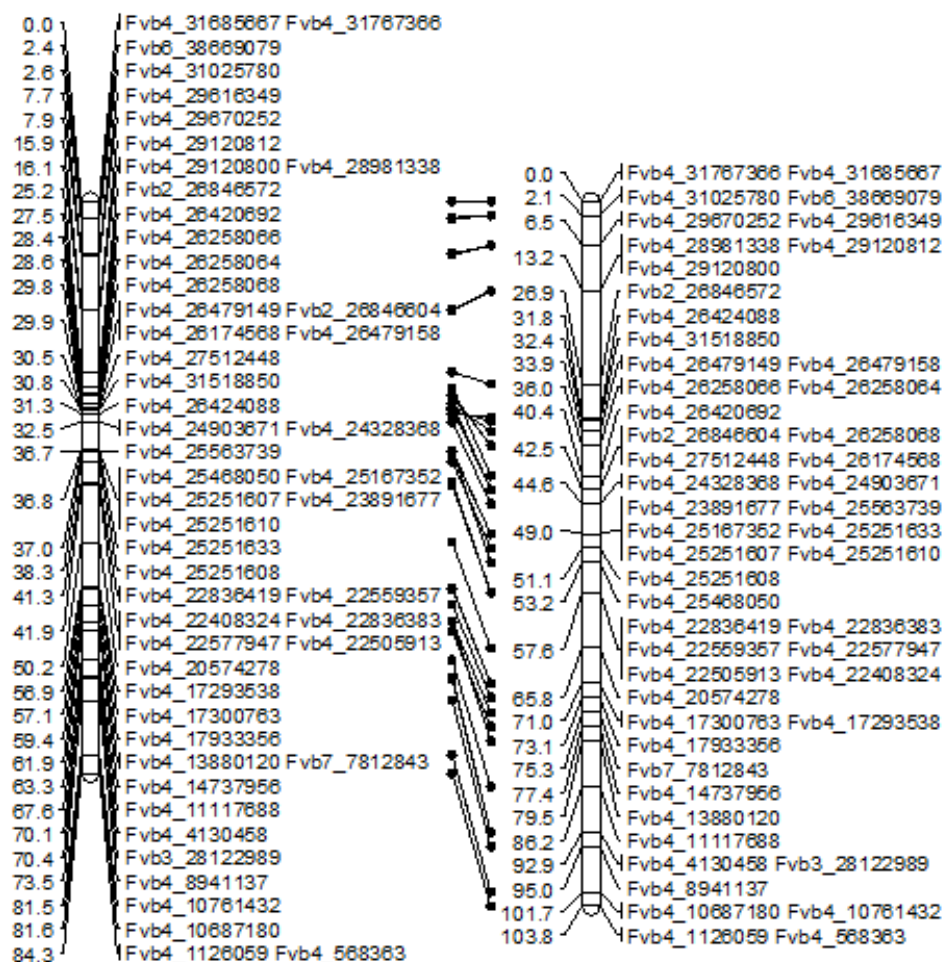

# Fvb 4

## Redgauntlet\_27

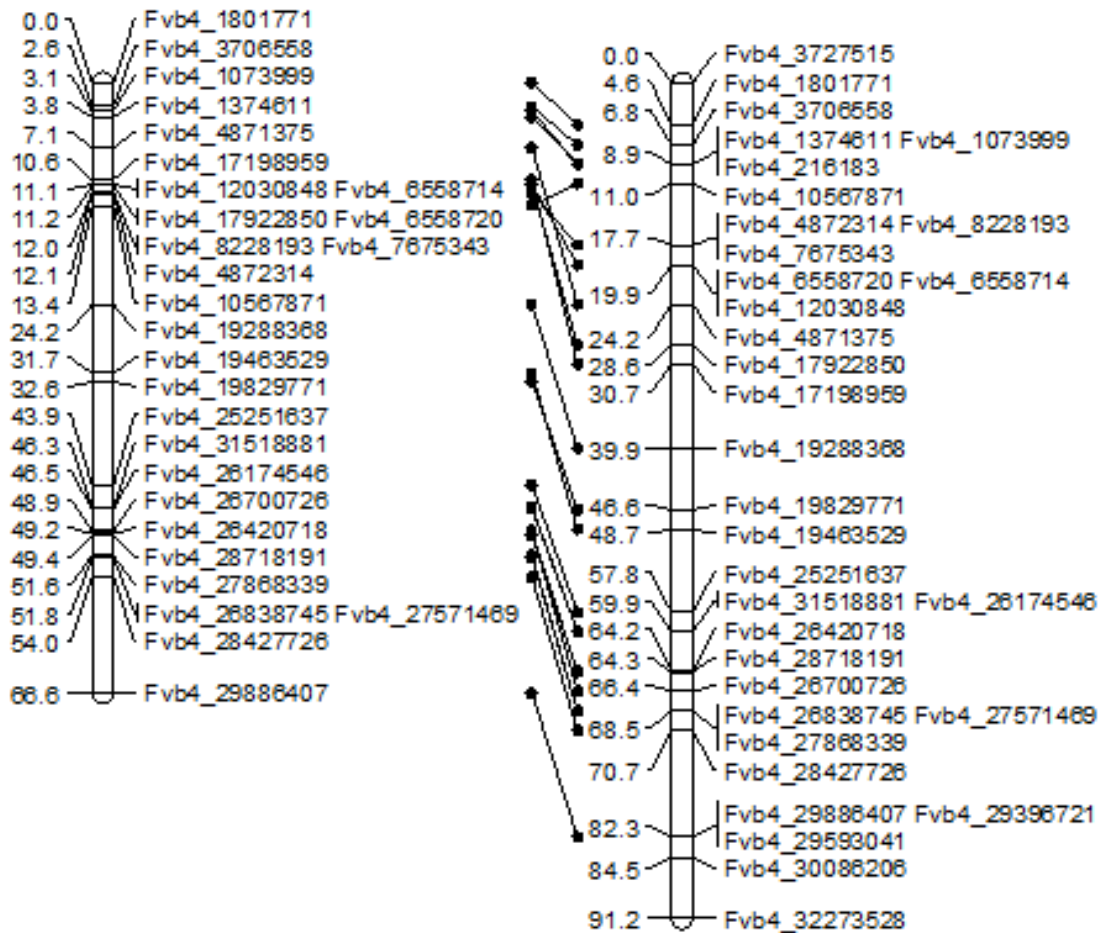

## Redgauntlet\_28

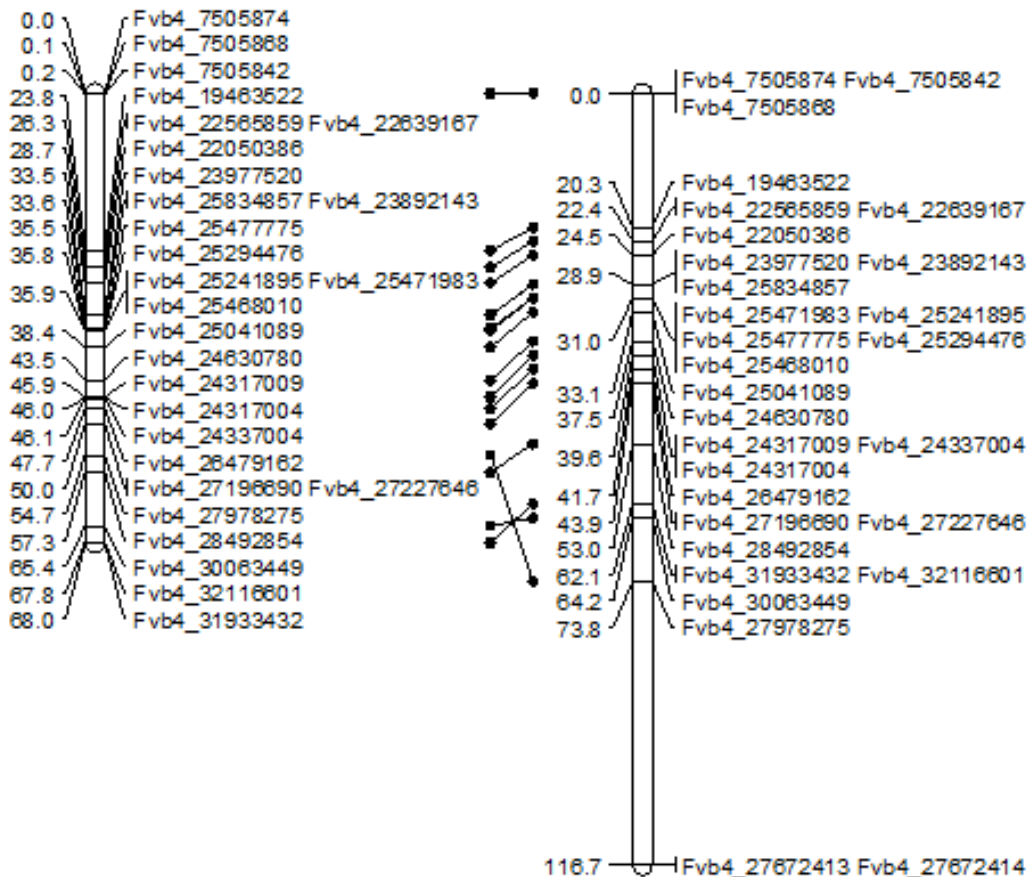

# Fvb 4

## Hapil\_24

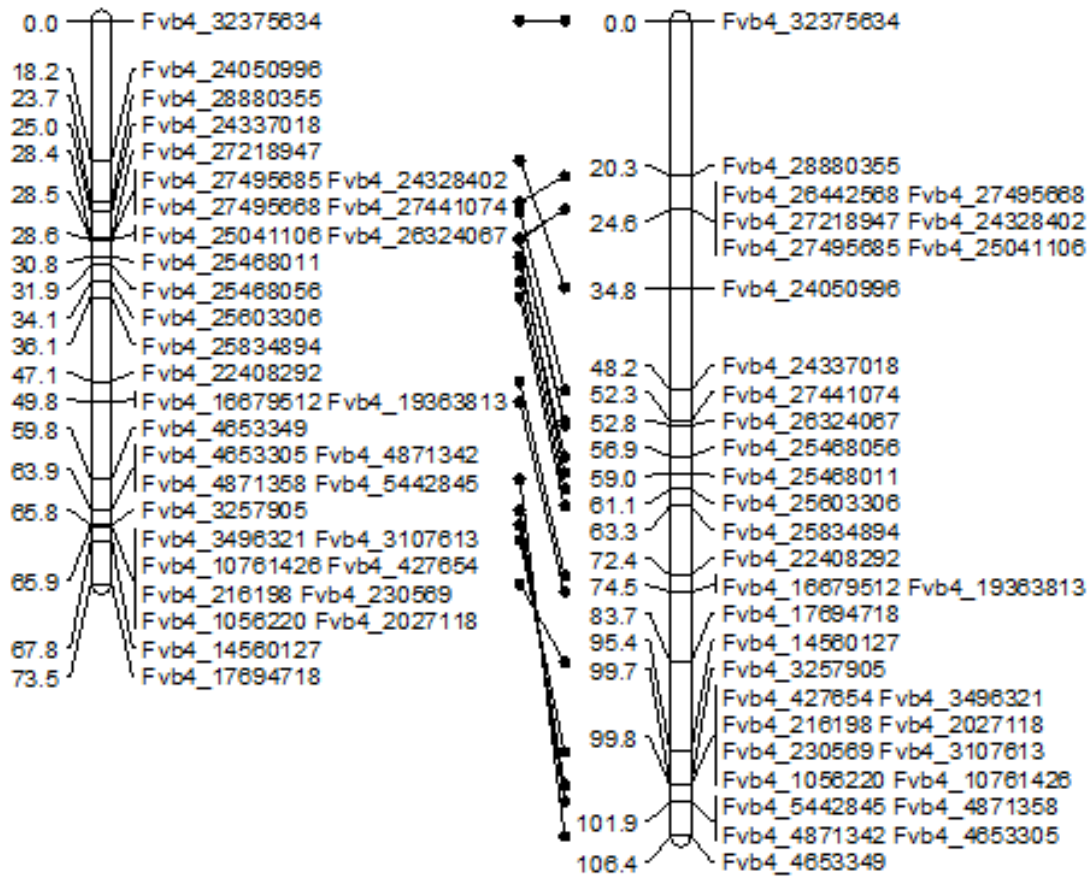

## Hapil\_30

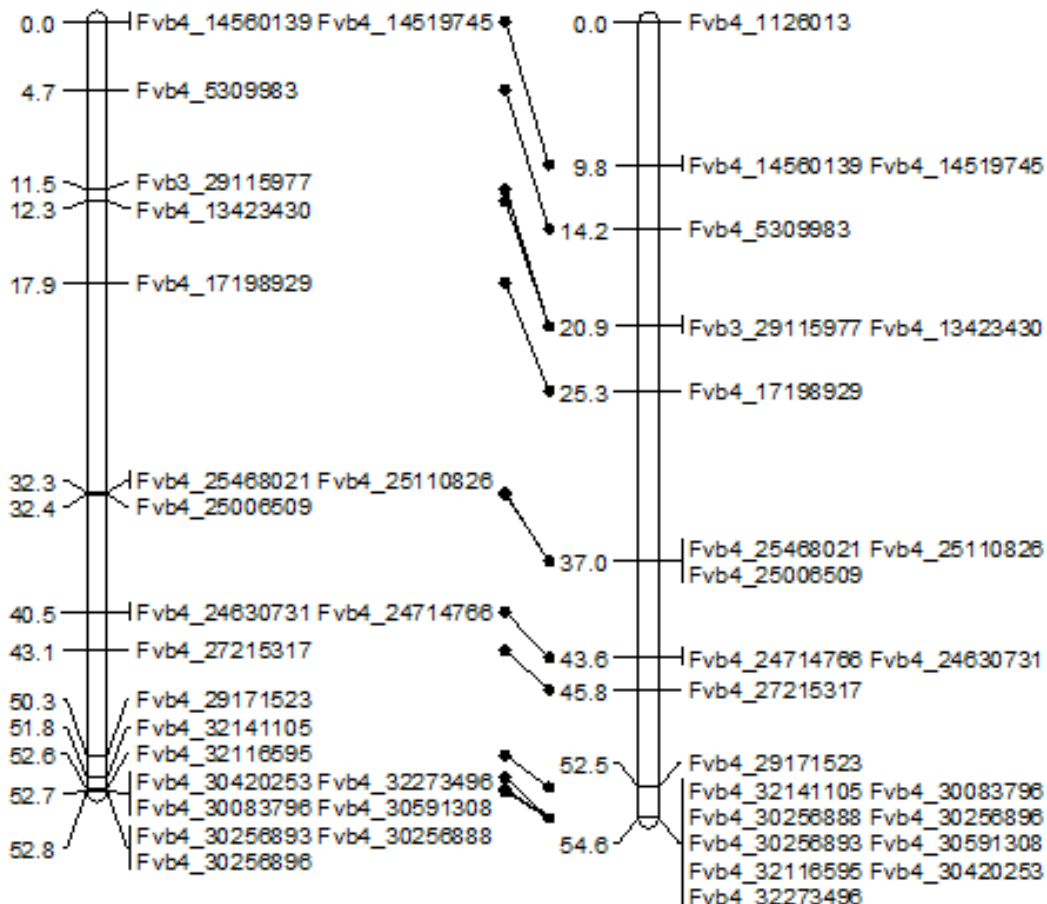

# Fvb 4

## Hapil\_31

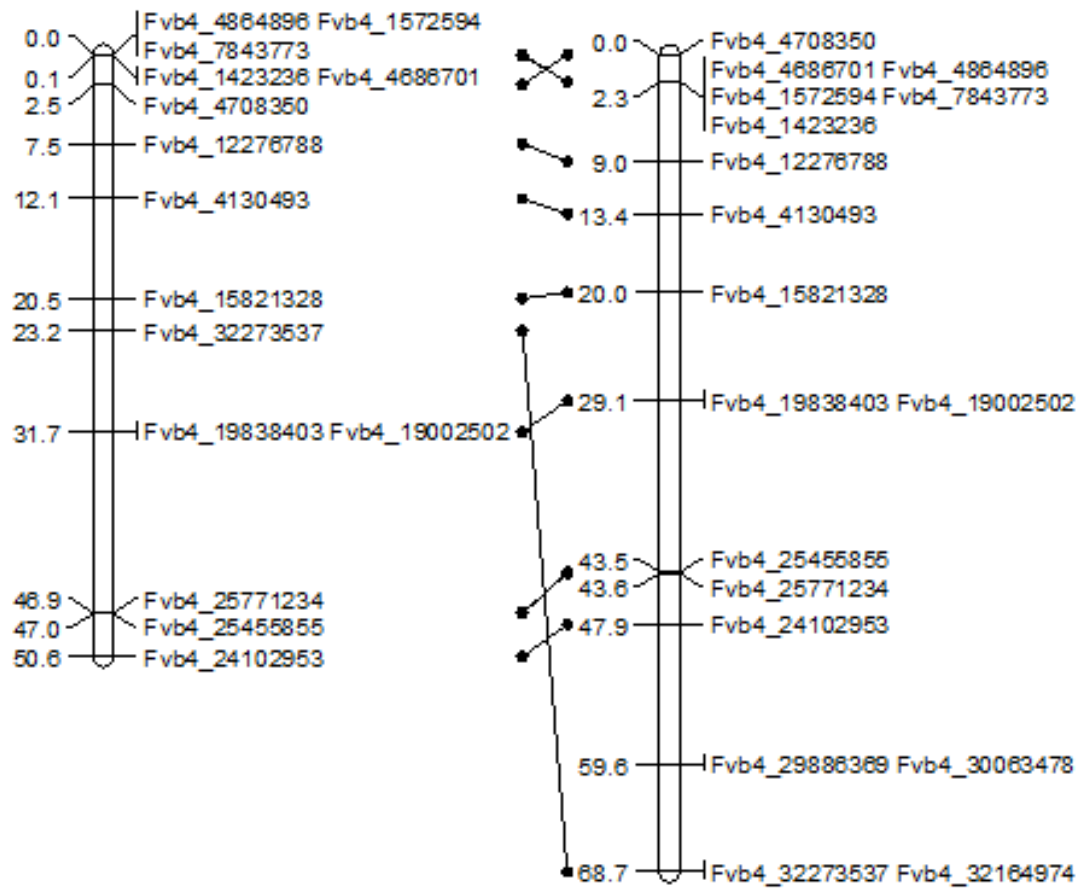

## Hapil\_35

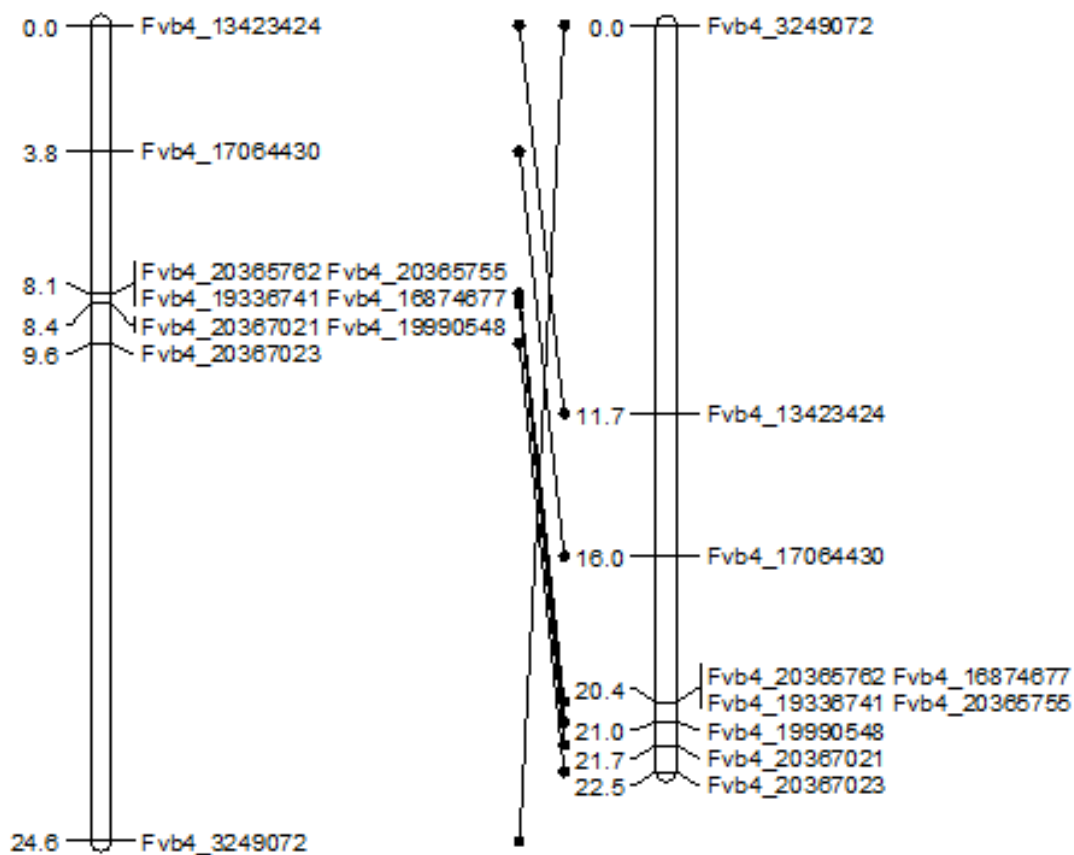



# Redgauntlet\_13

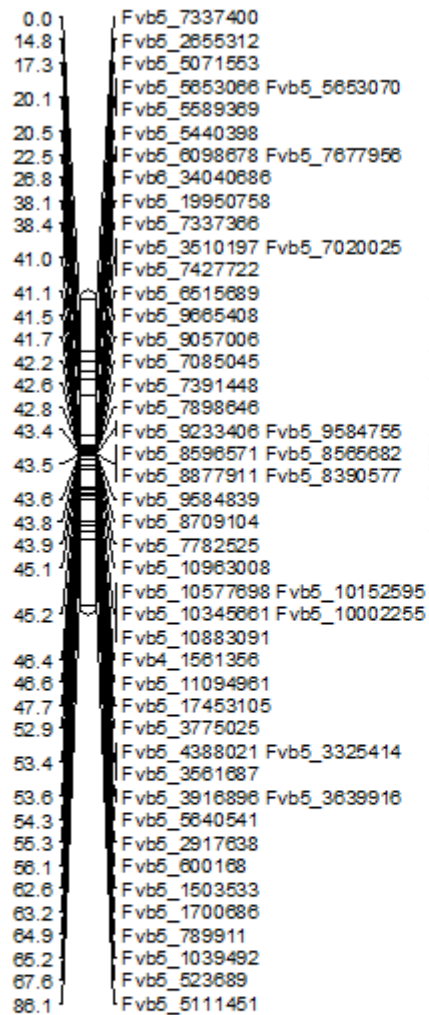

# Fvb 5

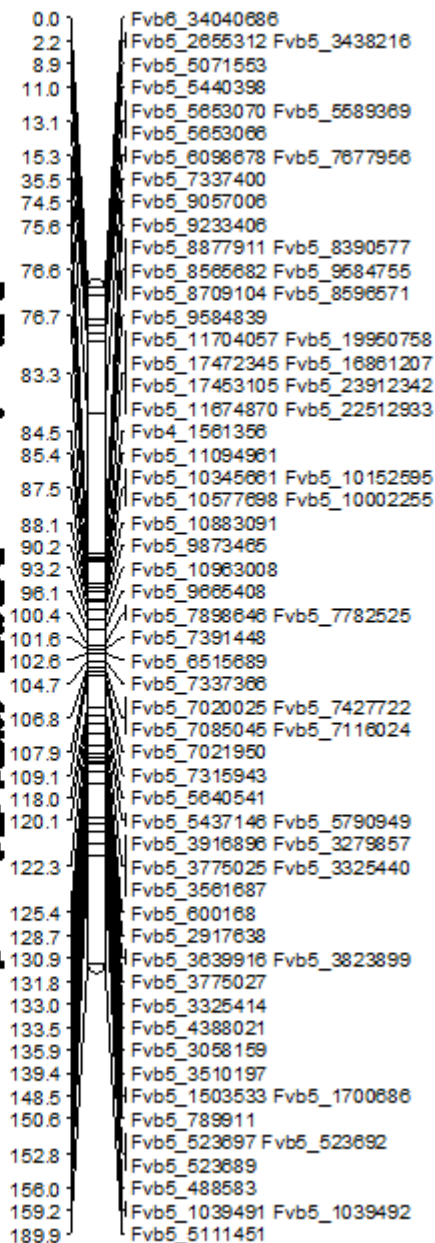

# Redgauntlet\_24

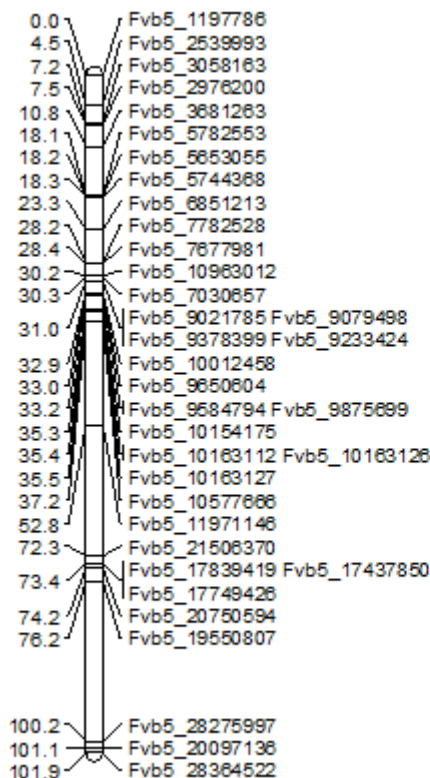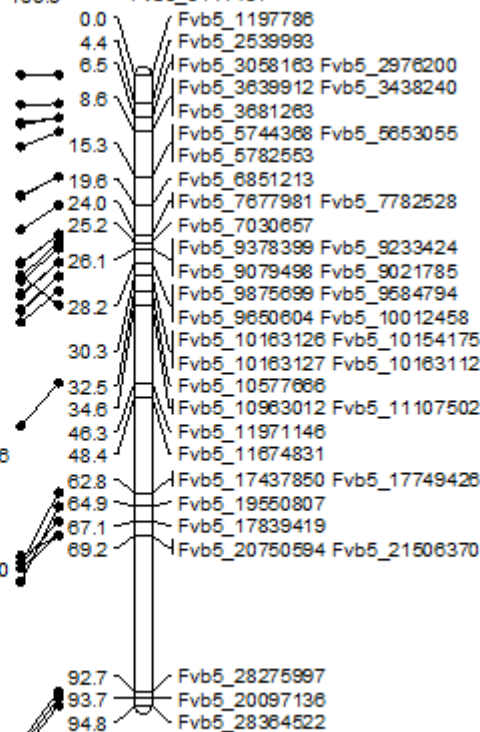

# Fvb 5

## Redgauntlet\_25

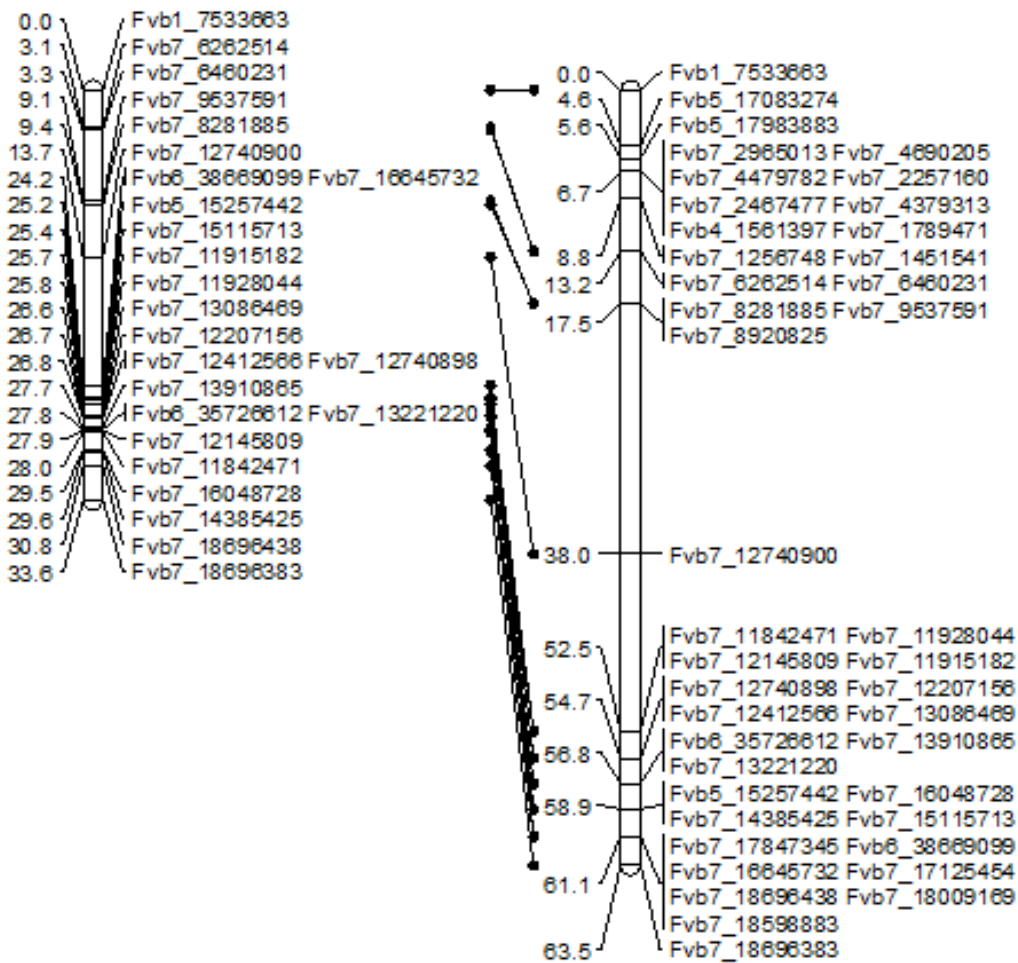

## Redgauntlet\_33

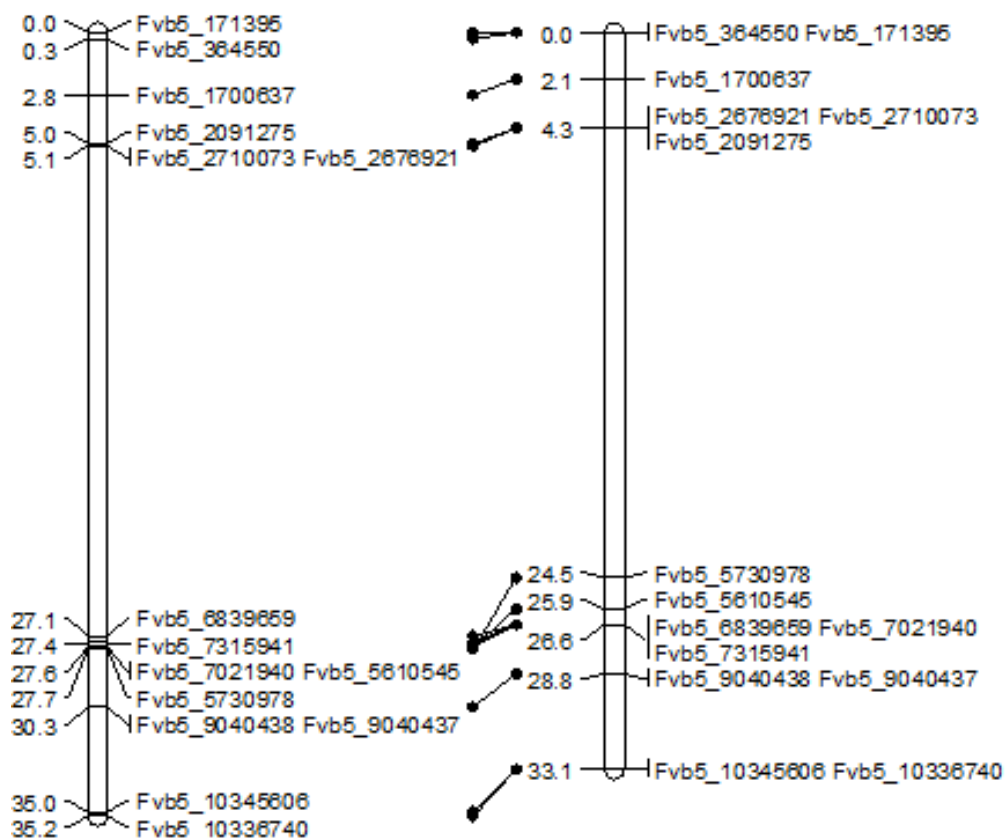

# Fvb 5

## Redgauntlet\_35

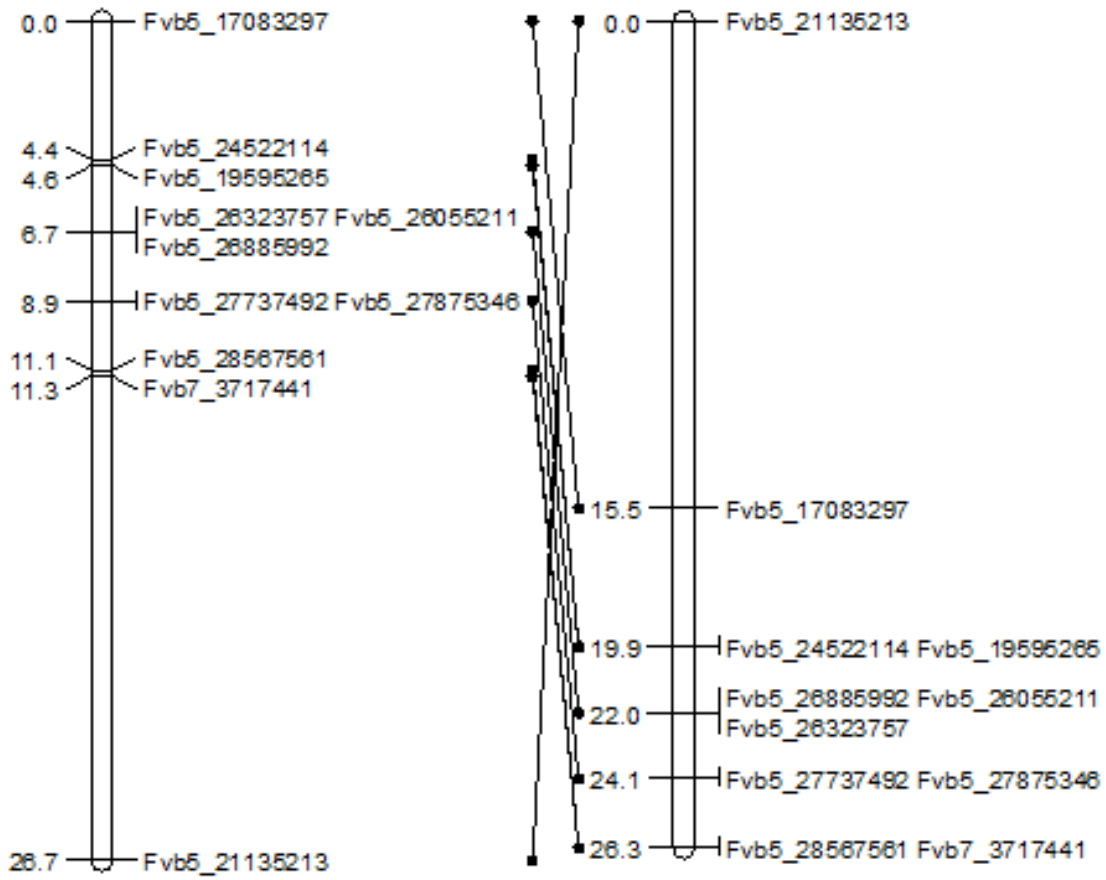

# Fvb 5

## Hapil\_1

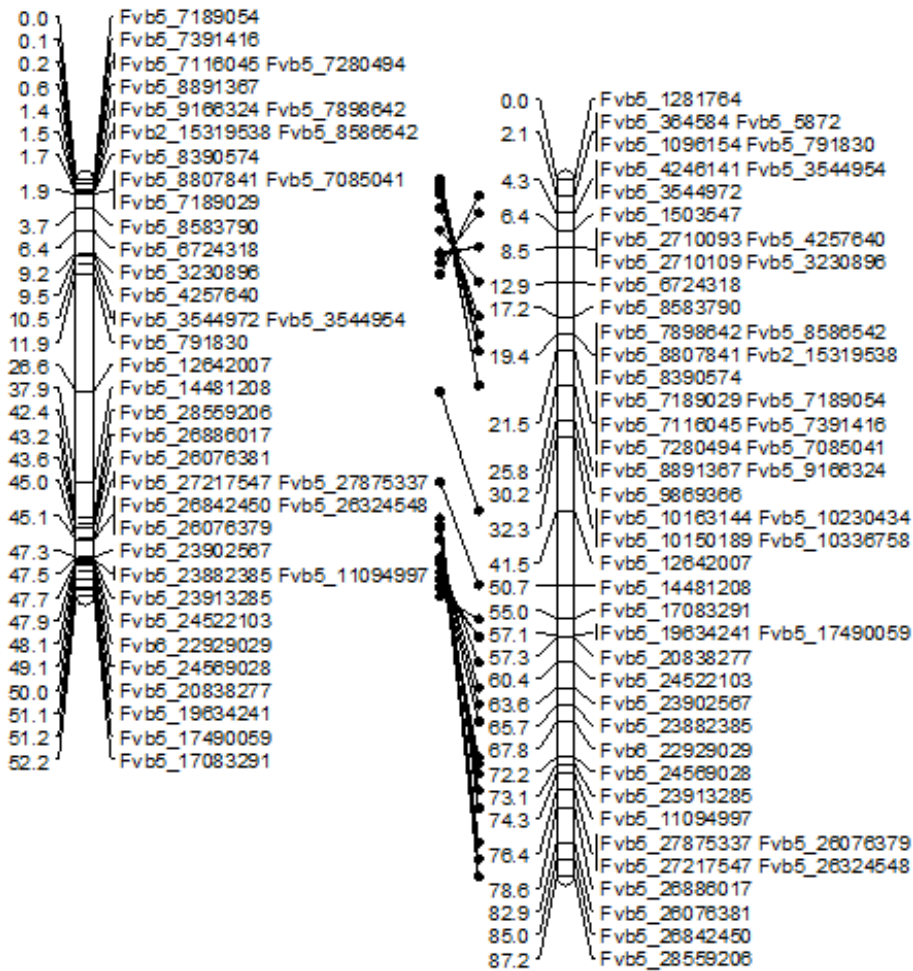

## Hapil\_6

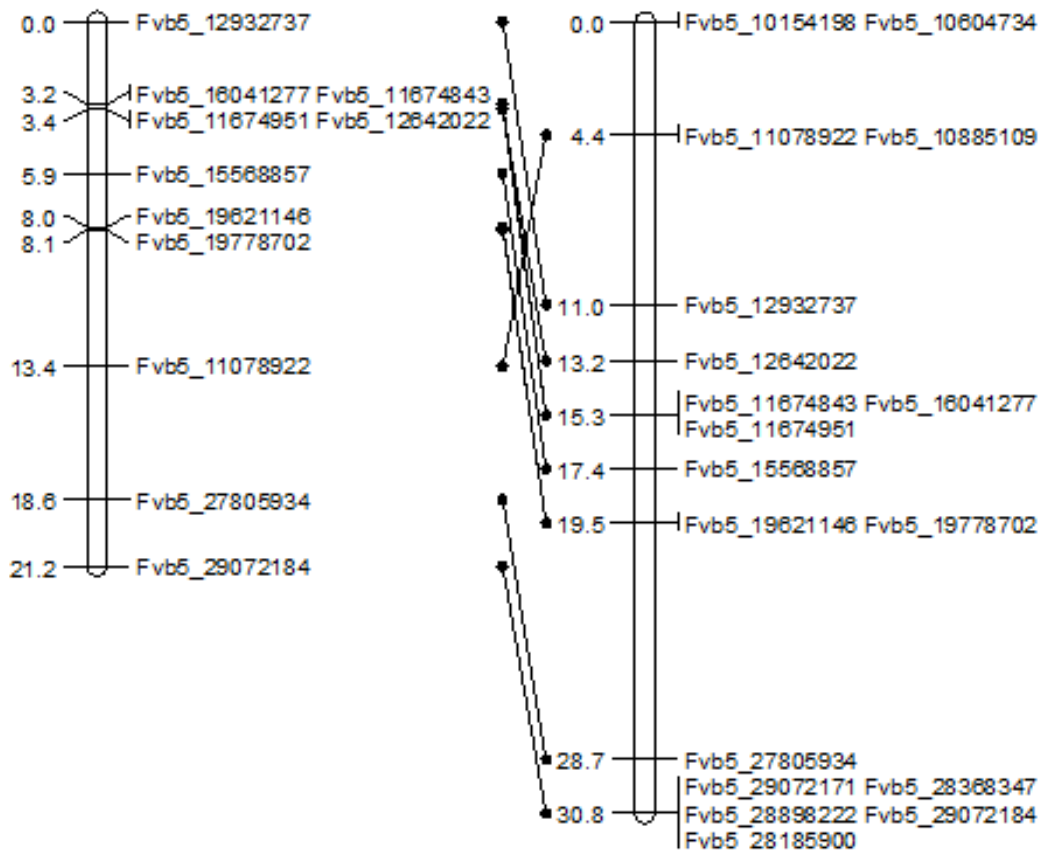

# Fvb 5

## Hapil\_20

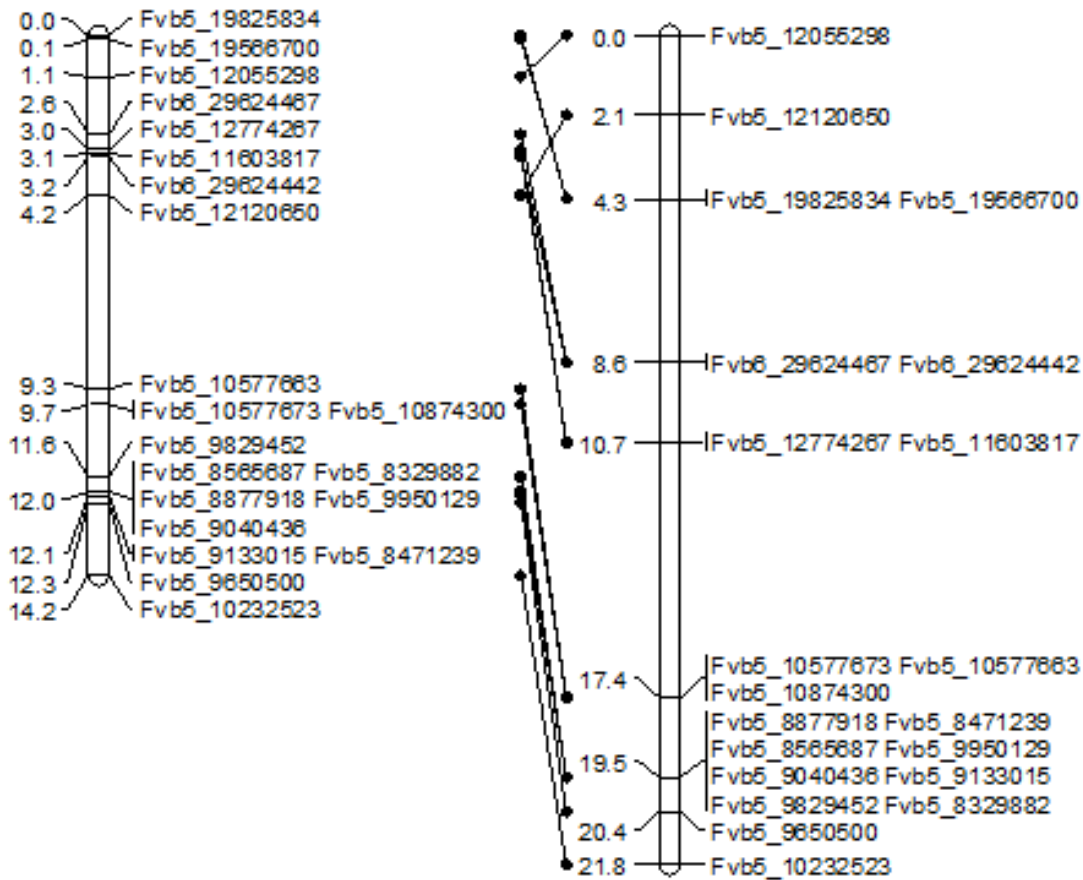

## Hapil\_28

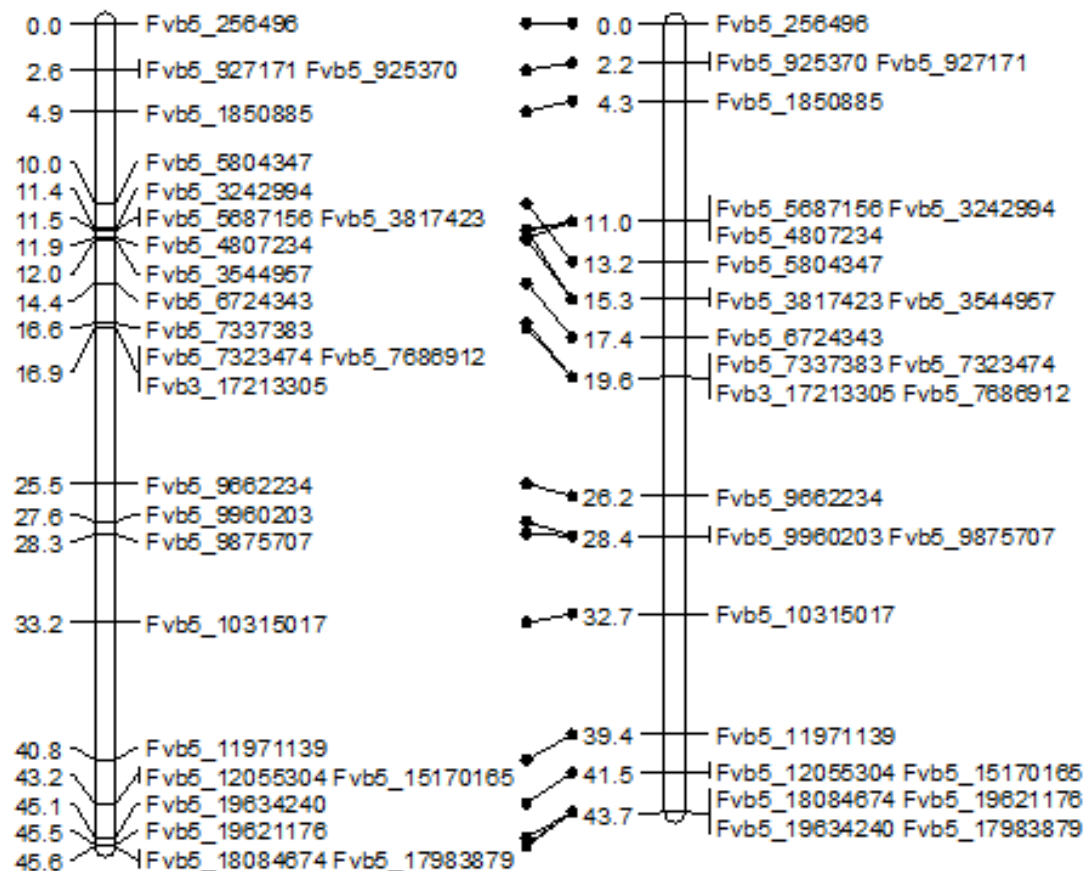

# Fvb 6

## Redgauntlet\_5

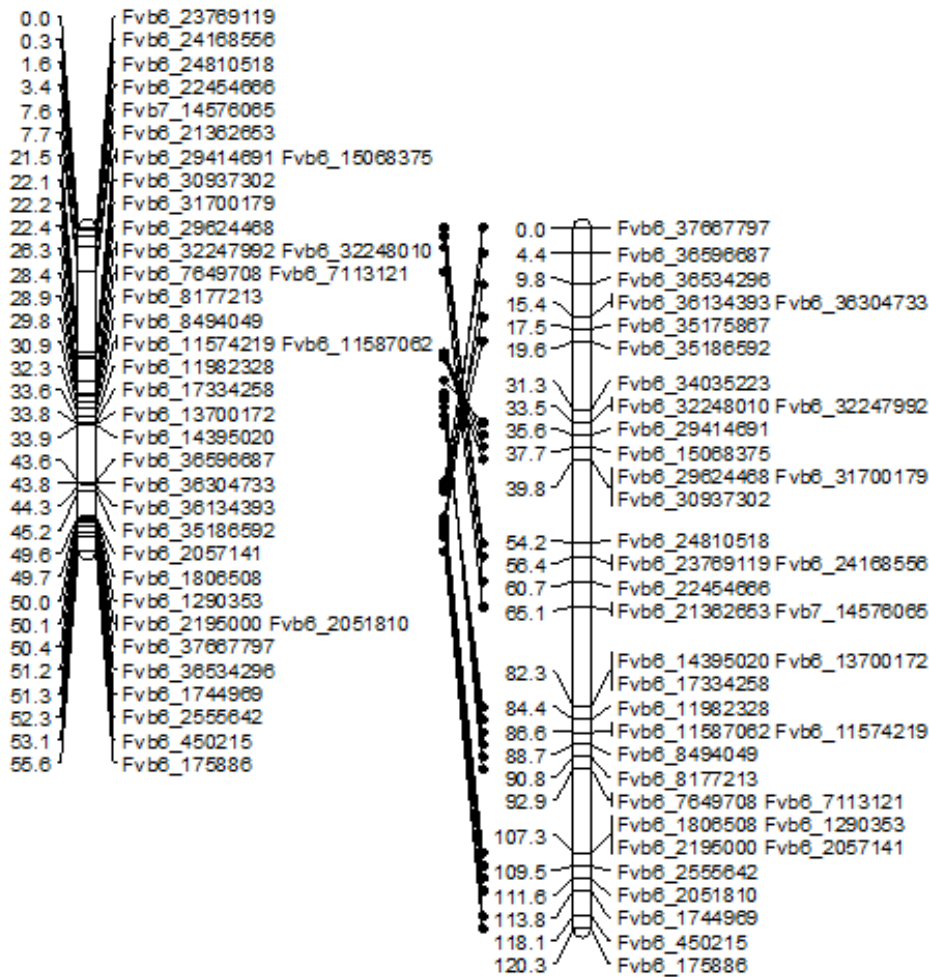

## Redgauntlet\_6

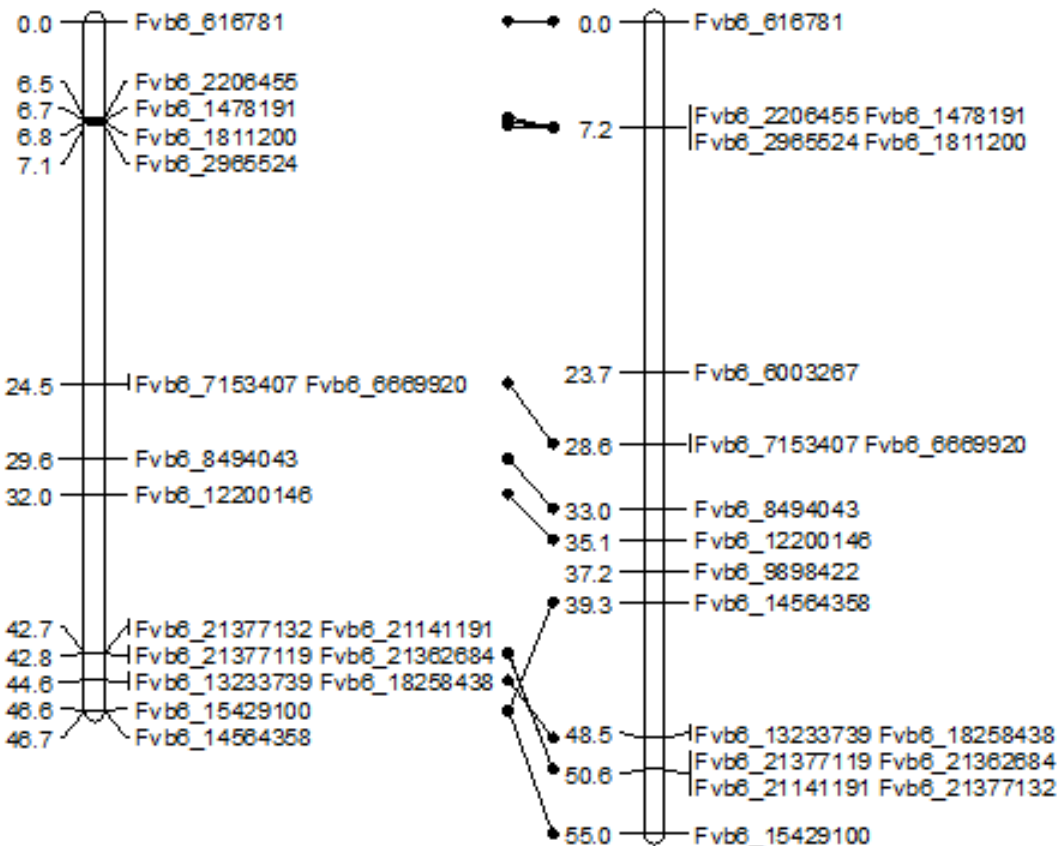

# Fvb 6

## Redgauntlet\_31

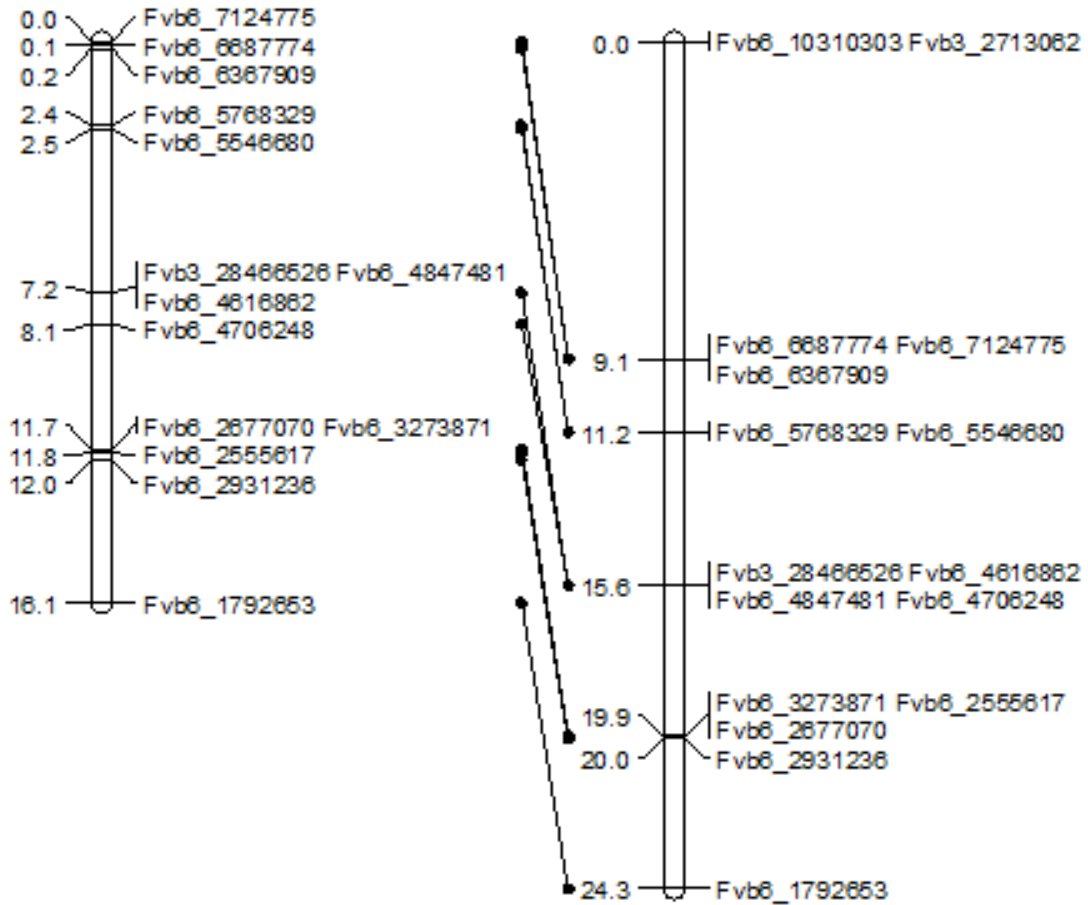

## Redgauntlet\_40

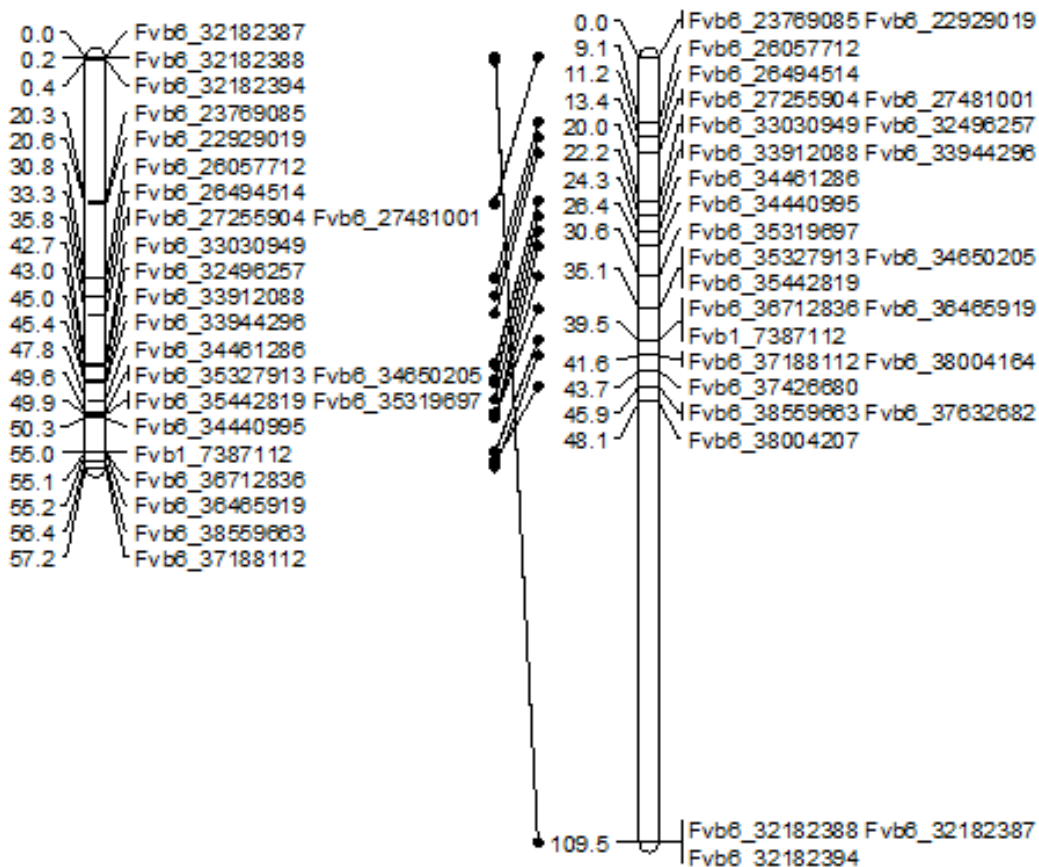

# Fvb 6

## Hapil\_2

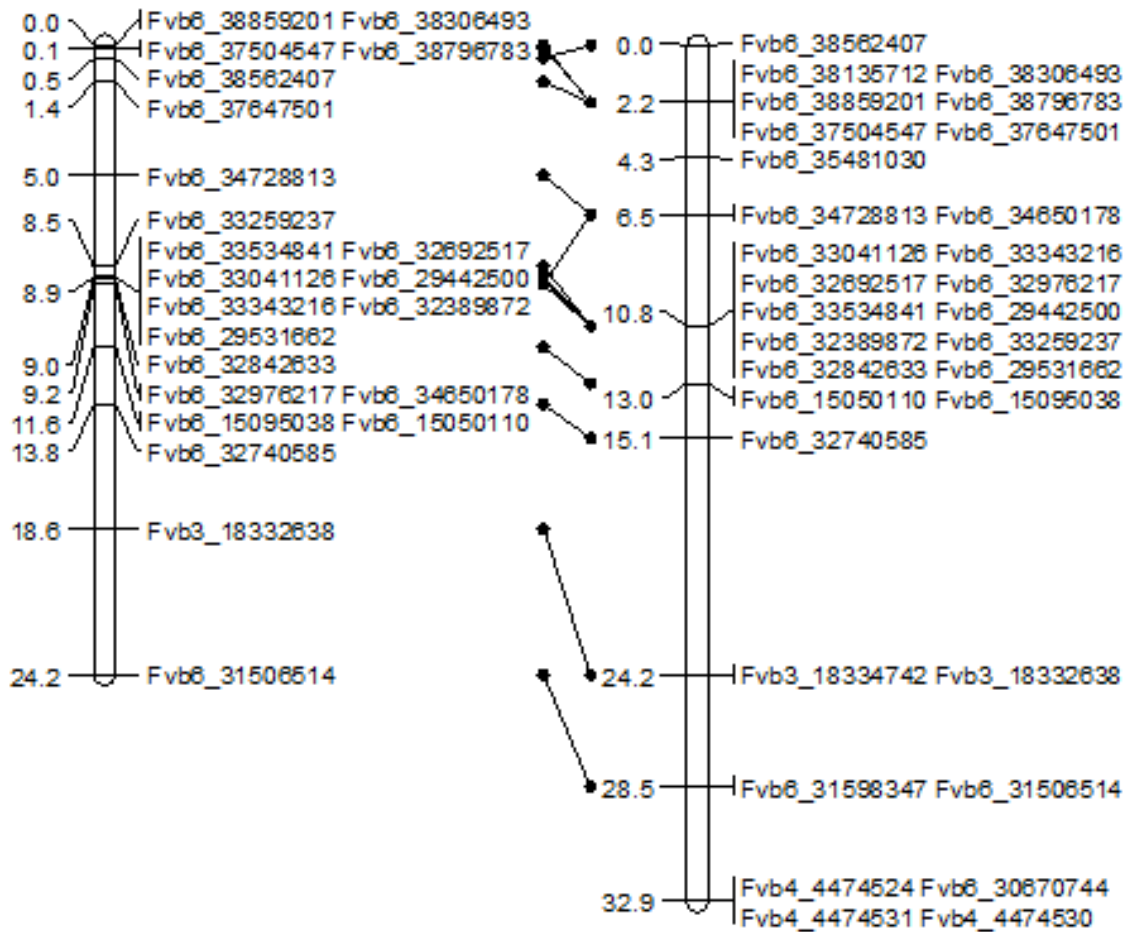

## Hapil\_3

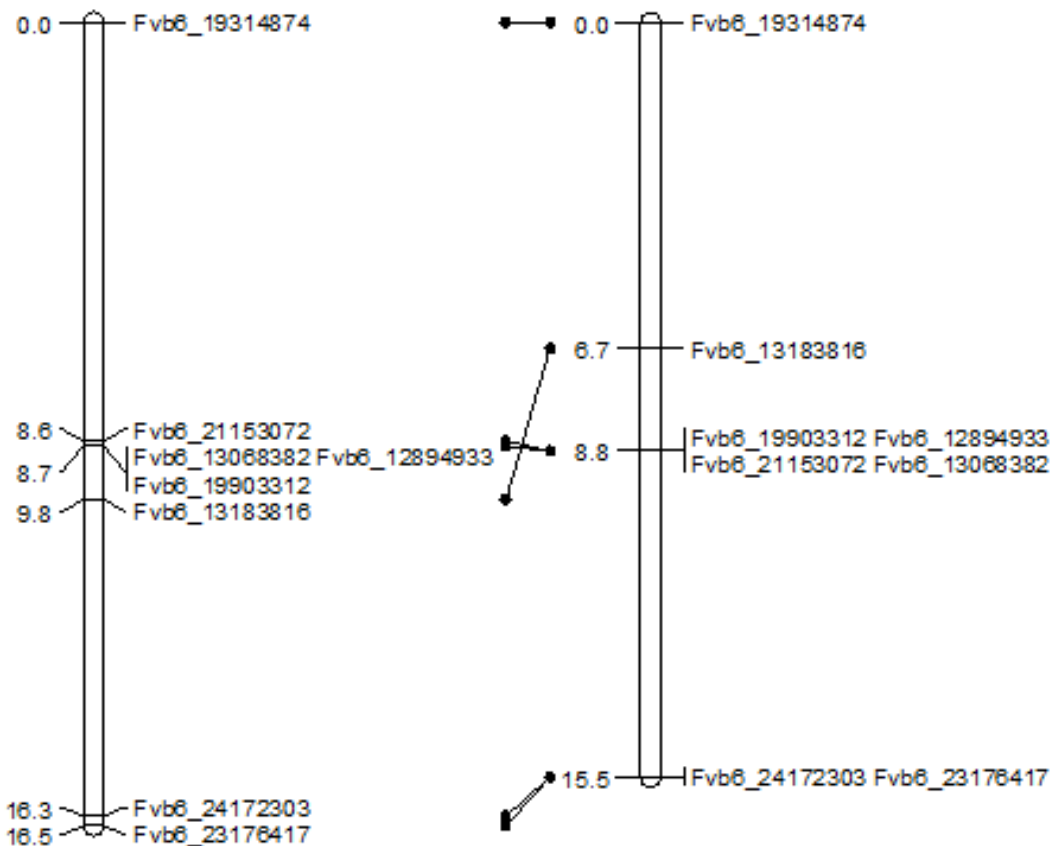



# Fvb 6

## Hapil\_14

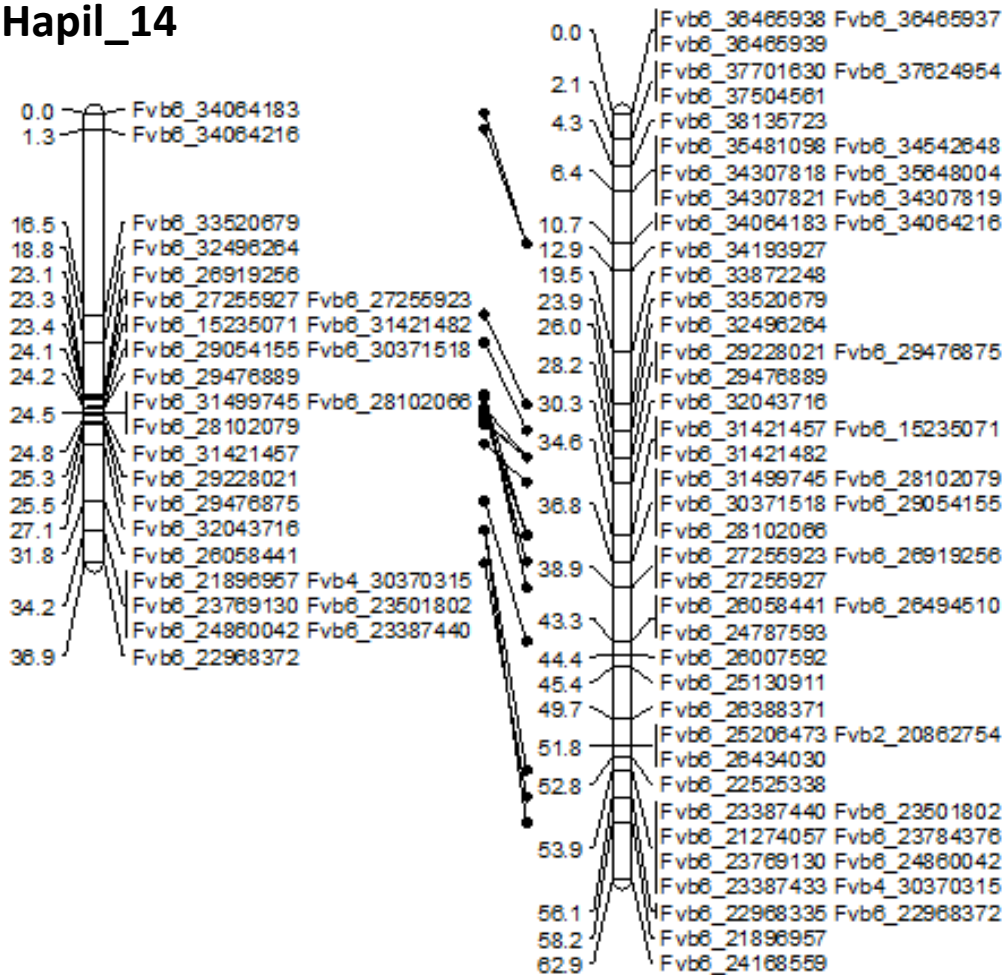

## Hapil\_25

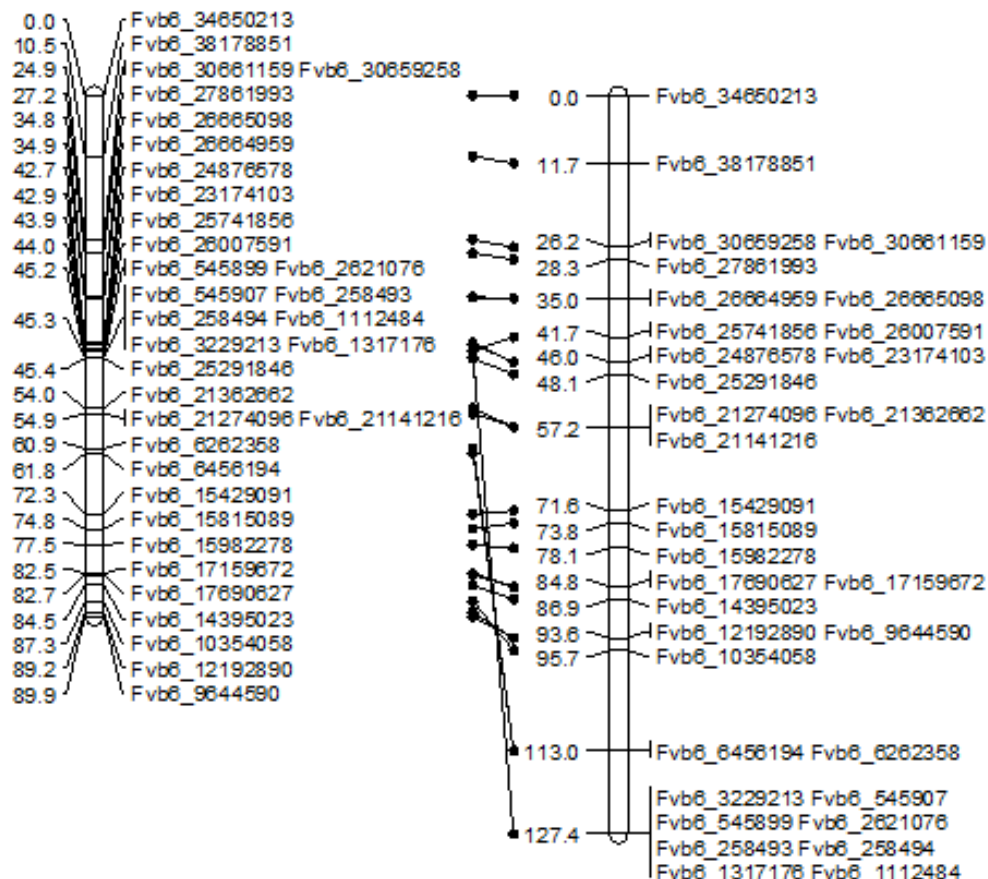

# Fvb\_6

## Hapil\_36

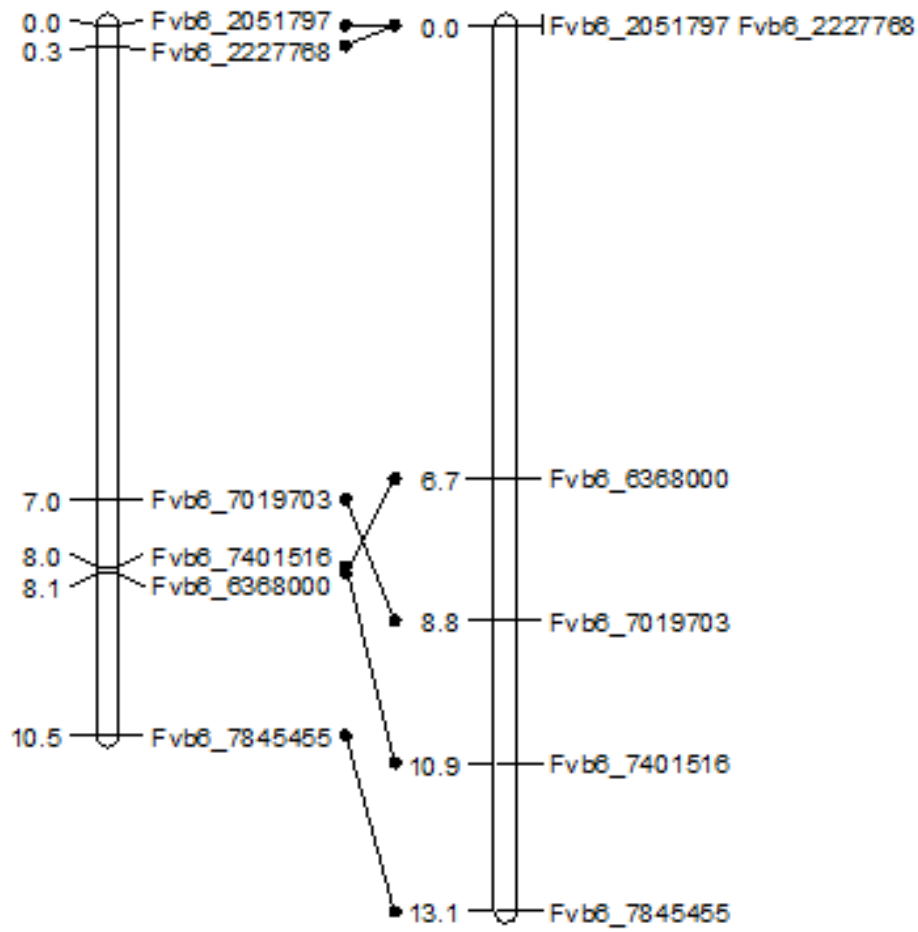

# Fvb 7

## Redgauntlet\_7

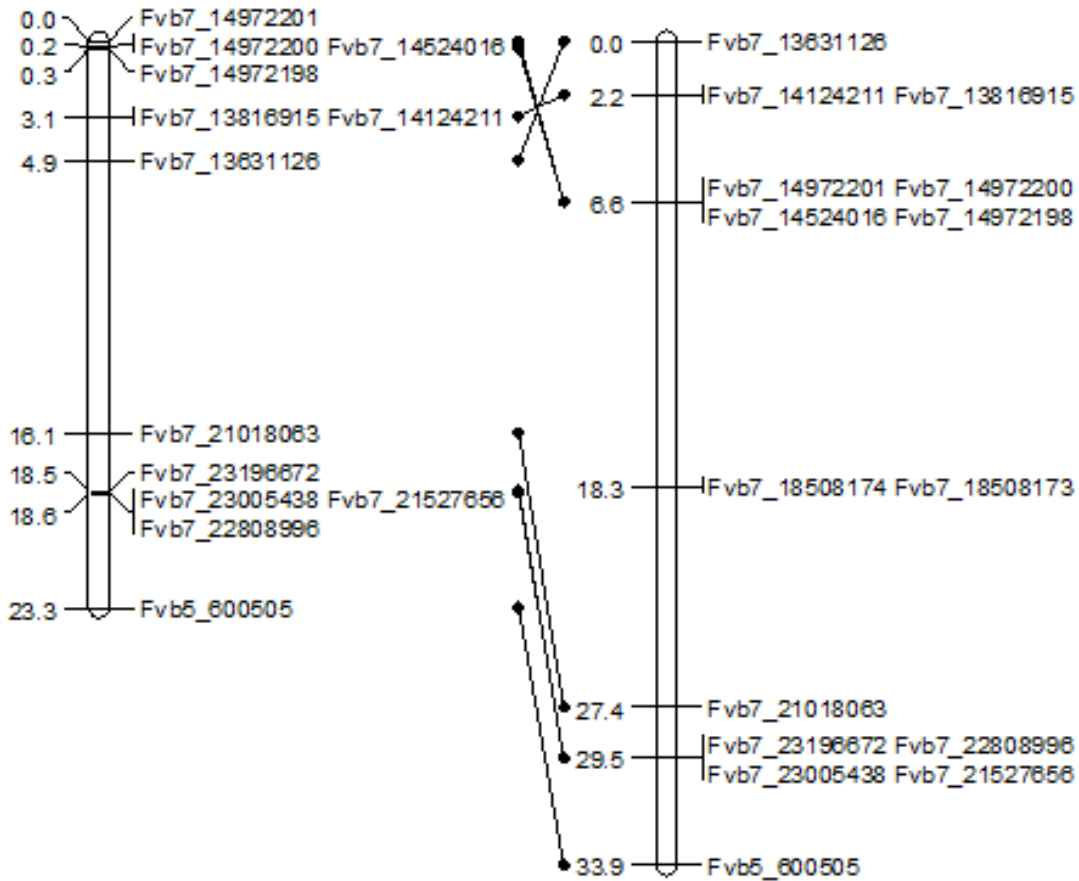

## Redgauntlet\_16

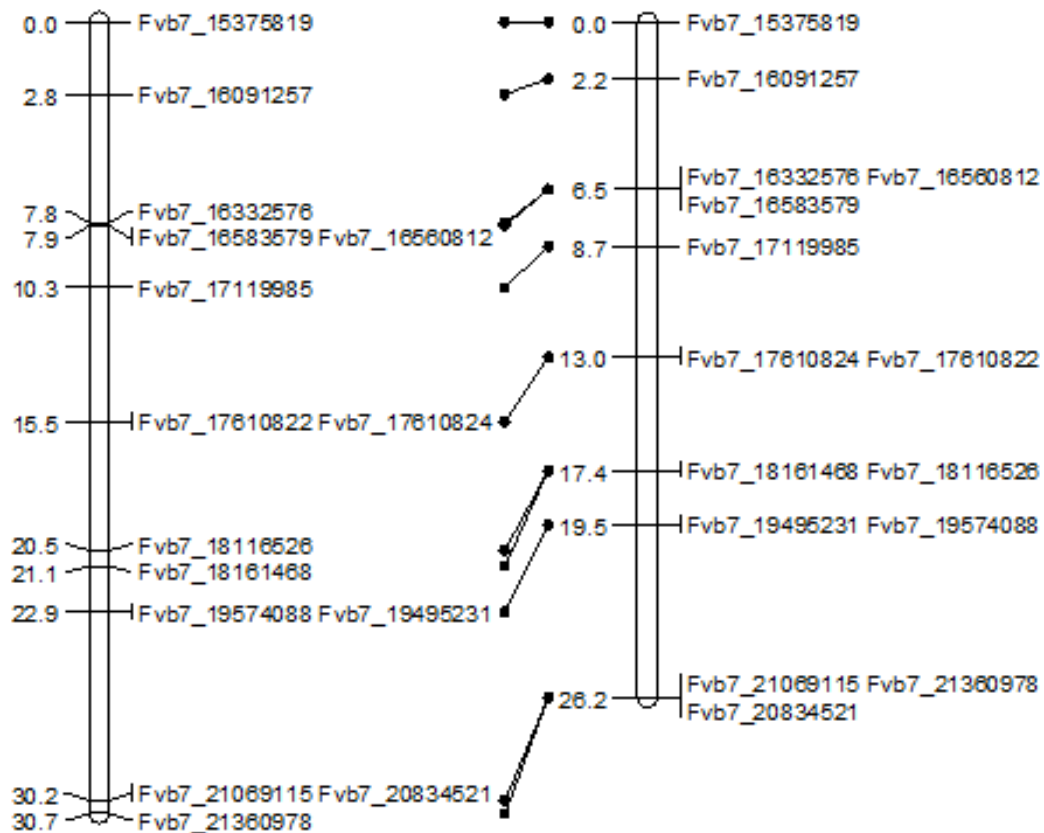

# Fvb 7

## Redgauntlet\_20

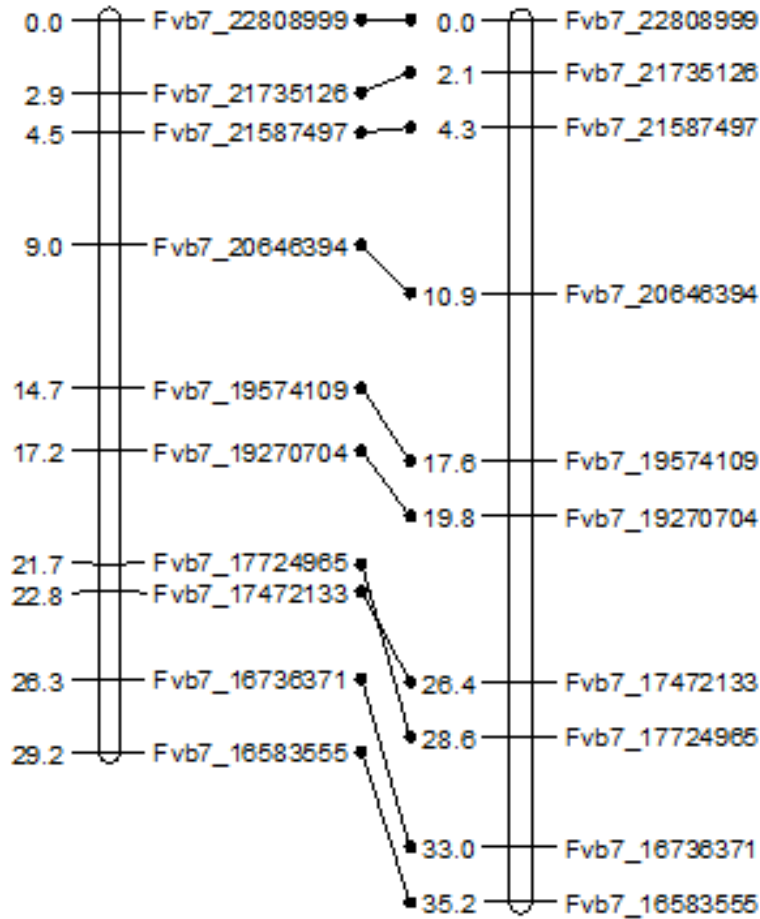

## Redgauntlet\_25

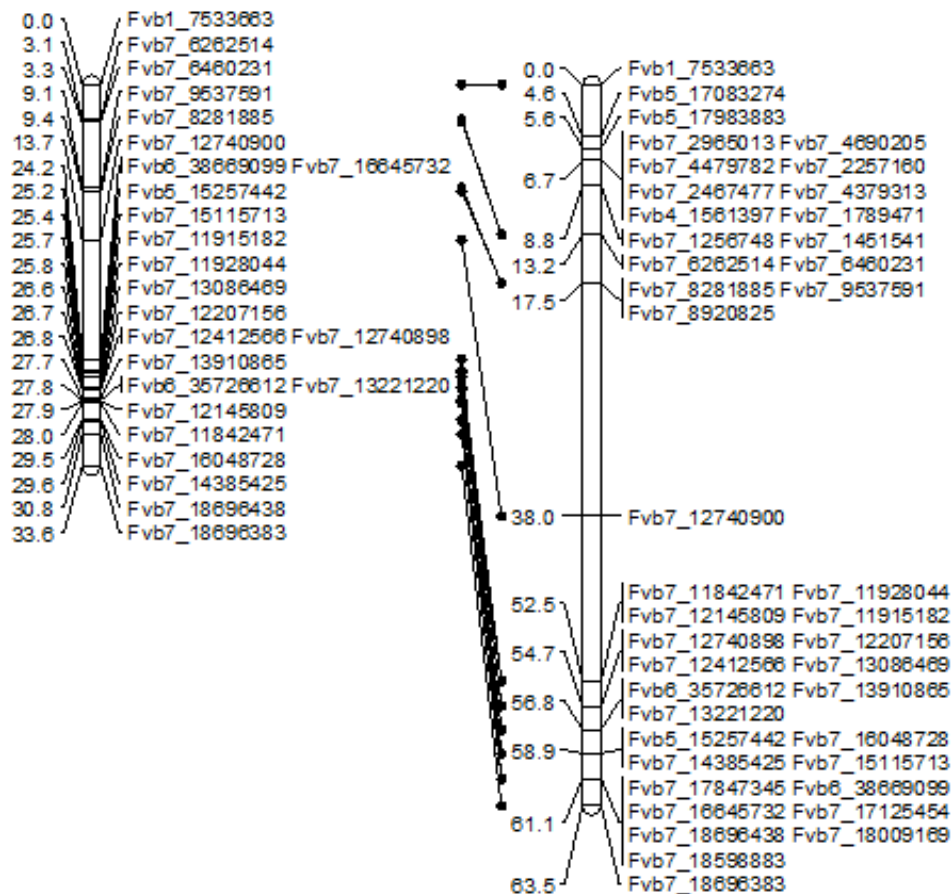

# Fvb 7

## Redgauntlet\_38

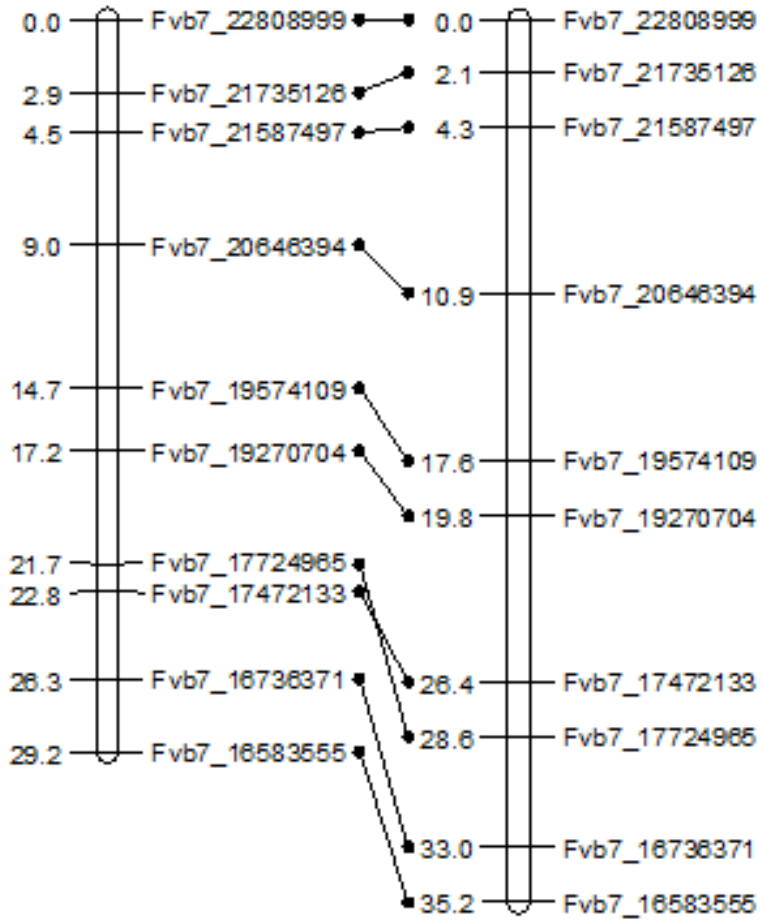

# Fvb 7

## Hapil\_5

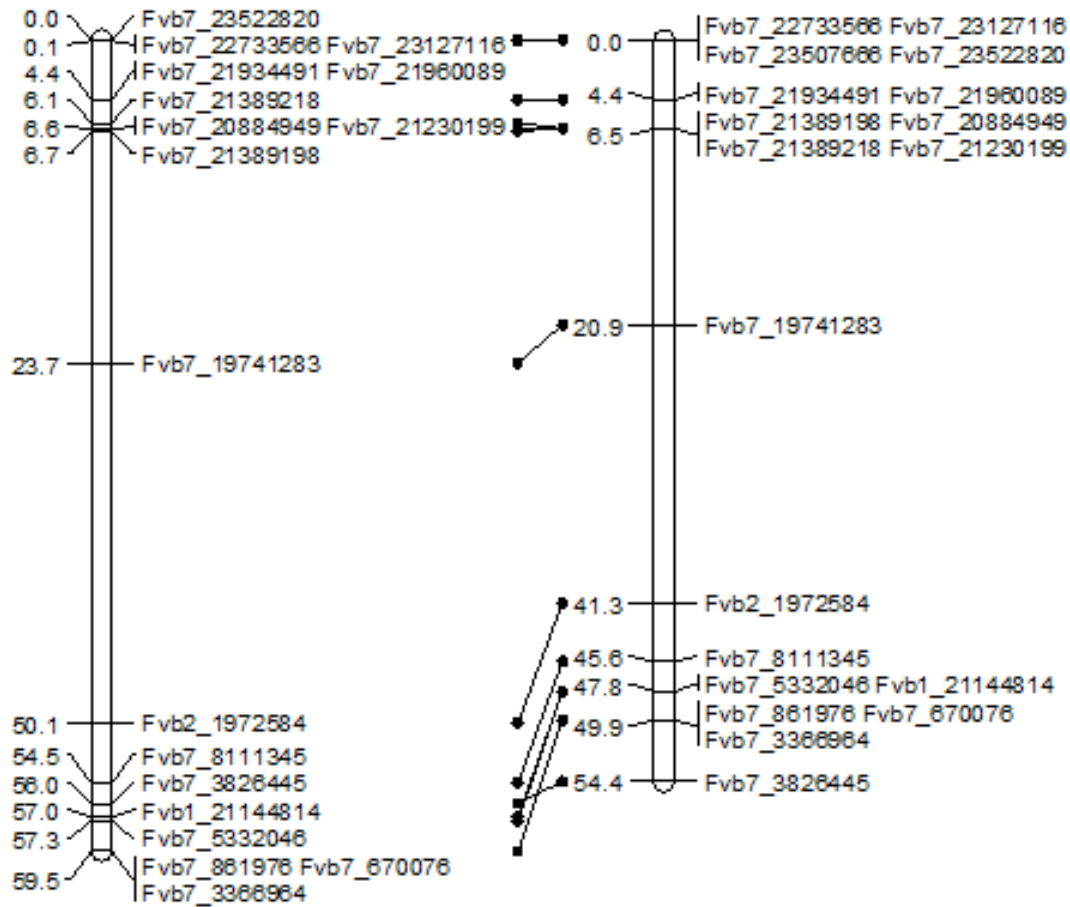

## Hapil\_12

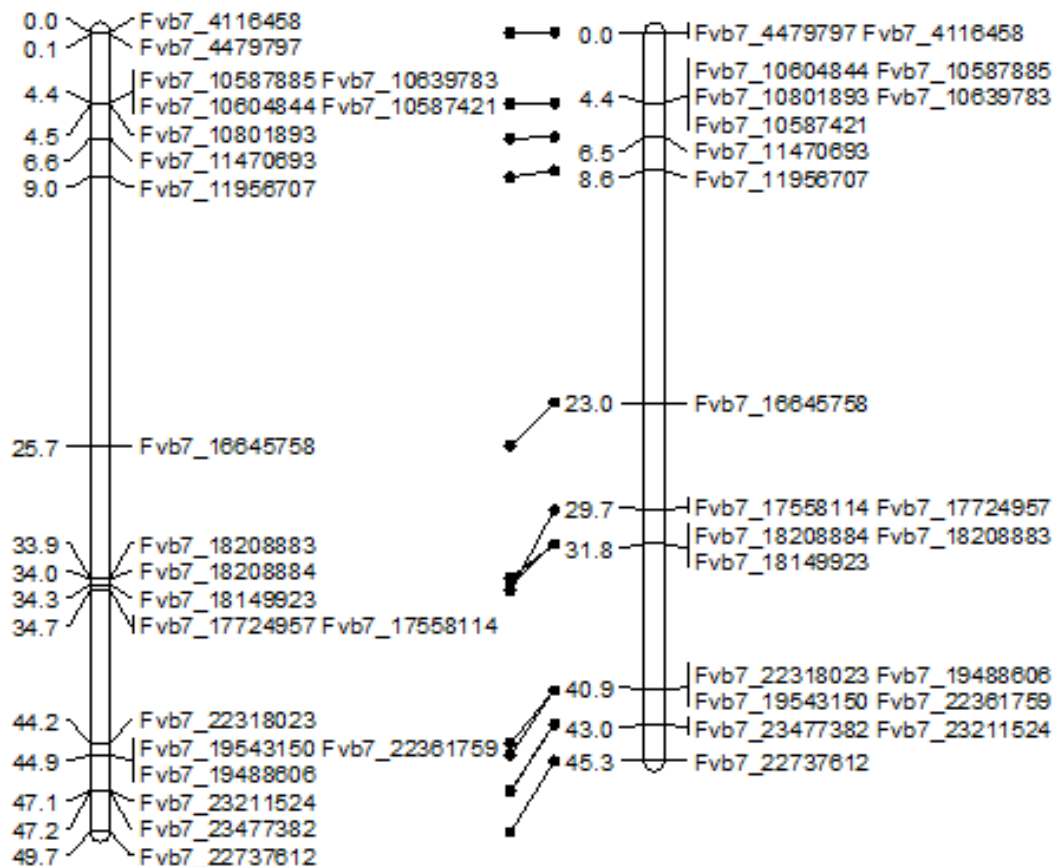

# Fvb 7

## Hapil\_23

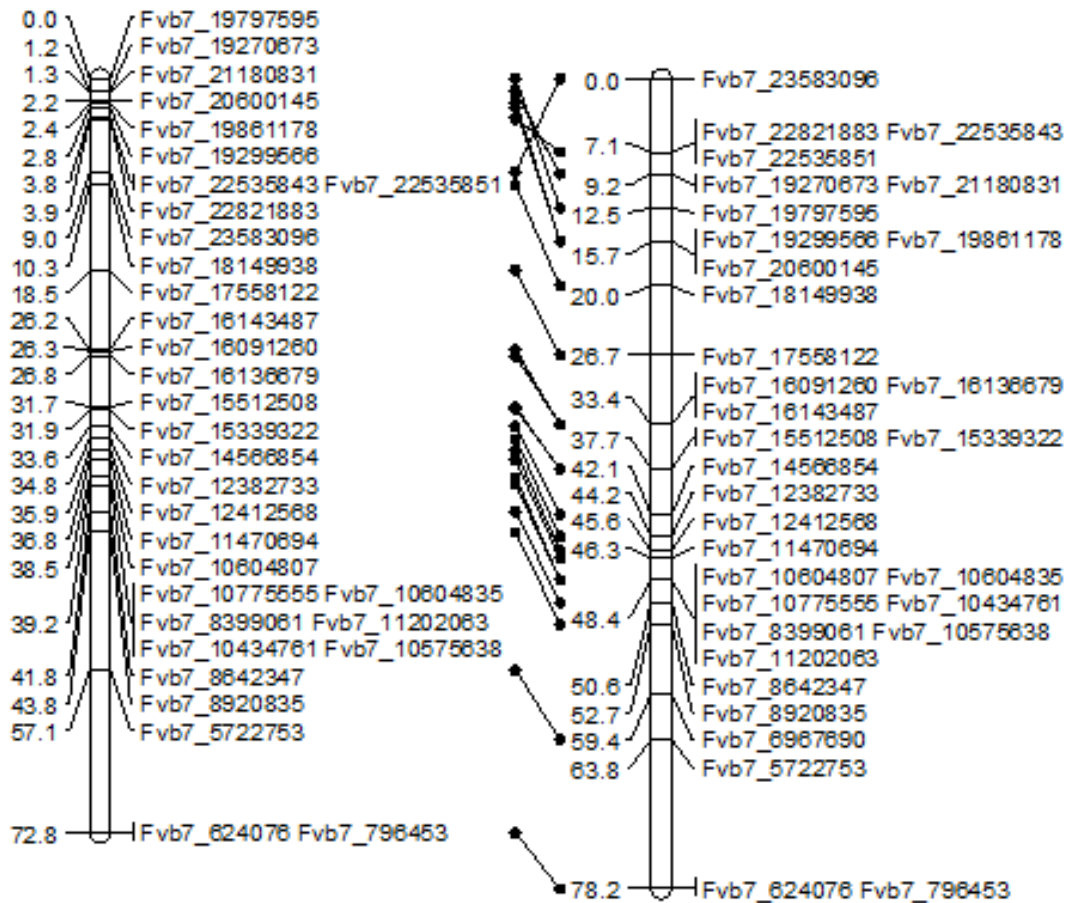

## Hapil\_32

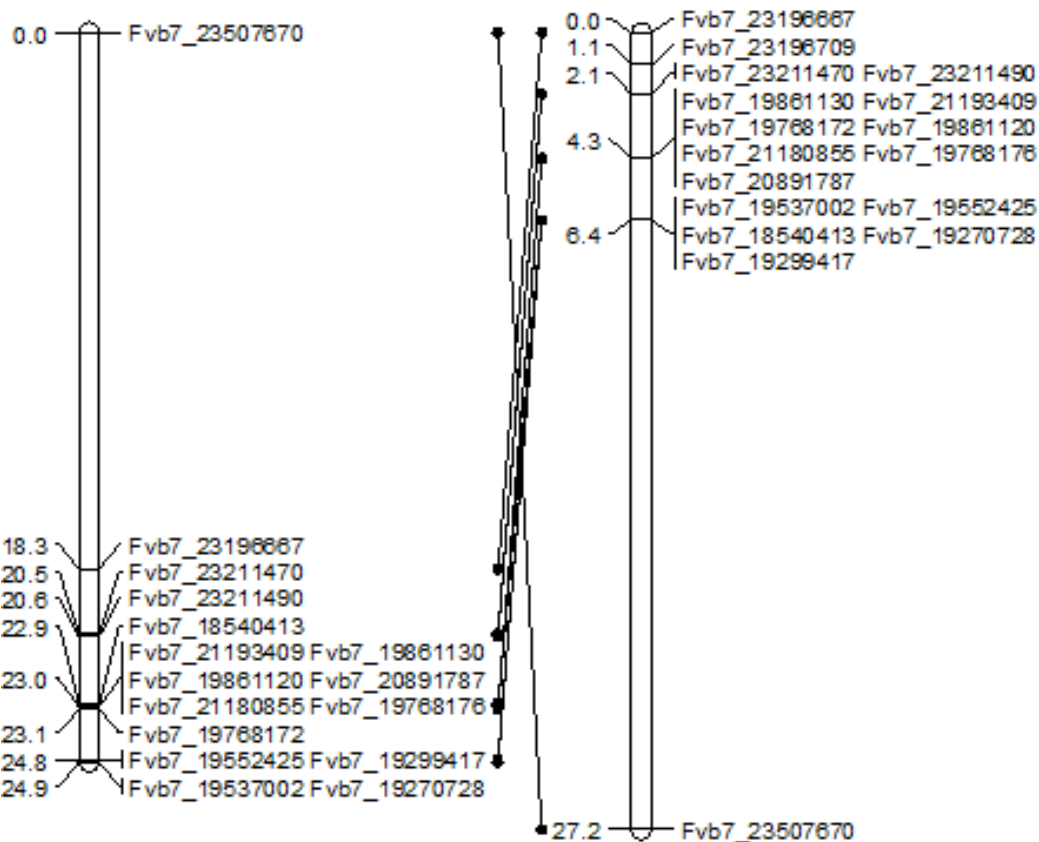

Supplement: peerj-05-3731-s004.pdf [file peerj-05-3731-s004.pdf]
